# Supplementary material for: Identification of genetic loci for early maturity in spring bread wheat using the association analysis and gene dissection
Source: PeerJ. 2023 Oct 9;11:e16109. doi: 10.7717/peerj.16109 (PMC10569184; doi:10.7717/peerj.16109)
Supplement: Supplemental Information 5 — Information about markers, their position on chromosomes, p-value, R2, and other statistical data. [file peerj-11-16109-s005.xlsx]

## Sheet: Лист1
Trait	Marker	Chr	Pos	df	F	p	add_effect	add_F	add_p	dom_effect	dom_F	dom_p	errordf	MarkerR2	Genetic Var	Residual Var	-2LnLikelihood	BH
mat_12	Kukri_c31628_571	7B	658219677	2	15.0976	3.34555e-06	3.16445	26.6019	2.11682e-06	5.7839	13.9382	0.000374681	73	0.233838	5.50508e-05	5.50508	329.281	0.0156454
mat_12	Tdurum_contig43995_611	7B	658219828	2	15.0976	3.34555e-06	3.16445	26.6019	2.11682e-06	5.7839	13.9382	0.000374681	73	0.233838	5.50508e-05	5.50508	329.281	0.0156454
mat_12	Excalibur_c31707_302	7B	680113513	2	13.9896	7.1915e-06	3.04688	24.3255	4.95378e-06	5.75111	13.4351	0.000465462	74	0.215399	5.64748e-05	5.64748	337.322	0.0224207
mat_12	Tdurum_contig43995_370	7B	658219587	2	12.4771	2.31971e-05	-3.08169	24.8109	4.38232e-06	1.64809	0.843164	0.361647	71	0.199969	5.6149e-05	5.6149	318.905	0.0542407
mat_12	Tdurum_contig44993_359	7B	662652952	2	11.4355	4.86604e-05	-3.02732	22.1935	1.16824e-05	3.61654	8.85104	0.003985	73	0.190781	0.0805963	5.85397	332.962	0.0910241
mat_12	IAAV6659	7B	679794445	2	10.1038	0.000135637	-2.12973	15.6081	0.000179841	5.18123	10.723	0.00162831	73	0.170437	6.18497e-05	6.18497	342.75	0.187666
mat_12	GENE-4442_121	7B	679799993	1	16.0004	0.000151753	NaN	NaN	NaN	NaN	NaN	NaN	73	0.138809	6.07909e-05	6.07909	334.566	0.187666
mat_12	Tdurum_contig5360_329	7B	679794384	2	9.90618	0.000160519	2.12815	15.4095	0.000198061	5.81403	9.1832	0.00340615	72	0.171268	6.2551e-05	6.2551	347.767	0.187666
mat_12	IAAV8521	7B	679794071	2	9.54831	0.0002072	2.14118	15.7644	0.000166342	4.7821	8.94858	0.00378515	74	0.163021	6.19224e-05	6.19224	341.609	0.209565
mat_12	RAC875_c89312_61	7B	678832328	2	9.46542	0.000224062	-2.13816	15.5663	0.00018314	4.80574	8.94417	0.00380844	73	0.16225	6.25278e-05	6.25278	336.518	0.209565
mat_12	Excalibur_c53111_215	7B	1258188	2	9.24336	0.000264067	-2.25809	17.3671	8.3592e-05	3.11242	4.13501	0.0456405	74	0.179394	0.65808	5.15868	339.769	0.224529
mat_12	BS00064905_51	UN	314905379	1	13.2705	0.000505142	NaN	NaN	NaN	NaN	NaN	NaN	73	0.129688	0.202326	6.22153	339.23	0.30528
mat_12	Kukri_c7804_2504	3B	457025568	2	8.40251	0.000519772	-1.35396	10.9428	0.00146069	-2.23736	6.66266	0.011853	74	0.149565	0.125017	6.11554	342.57	0.30528
mat_12	BS00047083_51	7B	680161741	2	8.24612	0.000602219	2.12858	15.7499	0.000170904	3.53839	3.55033	0.0636278	72	0.144991	6.12282e-05	6.12282	329.206	0.30528
mat_12	Excalibur_c41752_392	3B	493650726	2	8.0579	0.000688555	1.29197	10.9208	0.00147581	-2.5545	5.86298	0.0179484	74	0.144843	0.13236	6.1495	340.331	0.30528
mat_12	Tdurum_contig47508_250	2A	754339135	2	8.00817	0.000717197	1.76976	10.9794	0.00143584	-1.18564	1.11291	0.29493	74	0.144509	6.40944e-05	6.40944	343.246	0.30528
mat_12	BS00023075_51	2A	754339135	2	7.97091	0.000746335	-1.75571	10.6144	0.0017136	-1.34602	1.25896	0.265575	73	0.141179	6.49687e-05	6.49687	338.851	0.30528
mat_12	Tdurum_contig13245_119	7A	10908207	2	7.88184	0.000818113	1.37094	15.2737	0.000212266	0.314225	0.0841058	0.772666	71	0.14259	6.62998e-05	6.62998	338.025	0.30528
mat_12	RAC875_c43893_213	3B	482004501	2	7.84693	0.000833846	-1.33986	11.84	0.000974942	-2.29681	4.43161	0.0388185	72	0.139165	6.54311e-05	6.54311	336.082	0.30528
mat_12	BS00057451_51	3B	493655318	2	7.80192	0.000857307	1.21266	9.4919	0.00292249	-2.84034	6.376	0.0137704	73	0.148091	0.224685	6.09856	332.191	0.30528
mat_12	wsnp_Ku_rep_c68565_67614479	4A	594215456	2	7.71342	0.000914039	-1.20437	9.64715	0.00270035	2.57575	8.74492	0.00418054	74	0.167661	1.06576	4.83805	341.455	0.30528
mat_12	RAC875_rep_c83245_239	3B	480343168	2	7.66635	0.000967047	1.41524	11.6878	0.00104566	-2.08751	3.52535	0.0645449	72	0.143554	0.0495005	6.56384	335.125	0.30528
mat_12	BS00105995_51	3B	484872289	2	7.53186	0.00106216	-1.41733	12.0075	0.000890944	-1.90993	4.0161	0.0487788	74	0.139796	0.152437	6.19033	347.871	0.30528
mat_12	wsnp_Ex_c6488_11266589	1A	550613052	2	7.52774	0.00110348	-1.38199	14.842	0.000258752	-0.323178	0.0997777	0.75305	70	0.150807	0.604775	5.64225	326.017	0.30528
mat_12	Kukri_c16006_1996	5A	649246114	1	11.4892	0.00113895	NaN	NaN	NaN	NaN	NaN	NaN	73	0.109093	6.75907e-05	6.75907	342.276	0.30528
mat_12	IACX473	6A	585192913	2	7.45647	0.00114972	2.15552	11.6091	0.00108431	-2.69899	1.25696	0.266004	72	0.154173	1.03064	4.48821	328.405	0.30528
mat_12	RAC875_rep_c108082_333	5B	606850521	1	11.4034	0.00117122	NaN	NaN	NaN	NaN	NaN	NaN	75	0.109169	6.68083e-05	6.68083	350.217	0.30528
mat_12	RAC875_c11671_1921	5B	609142902	1	11.3955	0.00117554	NaN	NaN	NaN	NaN	NaN	NaN	75	0.110612	6.68547e-05	6.68547	349.887	0.30528
mat_12	Excalibur_c9868_1206	5D	263156555	1	11.3955	0.00117554	NaN	NaN	NaN	NaN	NaN	NaN	75	0.110612	6.68547e-05	6.68547	349.887	0.30528
mat_12	Excalibur_c28592_173	5D	475308482	2	7.39856	0.00118647	2.00749	13.0891	0.000544039	3.80416	6.46199	0.0131424	74	0.134641	6.49626e-05	6.49626	343.742	0.30528
mat_12	CAP8_c145_89	5D	547273468	2	7.39856	0.00118647	2.00749	13.0891	0.000544039	3.80416	6.46199	0.0131424	74	0.134641	6.49626e-05	6.49626	343.742	0.30528
mat_12	Excalibur_c42190_383	5D	546906300	2	7.39855	0.00118647	-2.00749	13.089	0.000544042	3.80416	6.46198	0.0131424	74	0.131996	6.49627e-05	6.49627	343.629	0.30528
mat_12	CAP7_rep_c12715_390	5D	547273523	2	7.39855	0.00118647	-2.00749	13.089	0.000544042	3.80416	6.46198	0.0131424	74	0.131996	6.49627e-05	6.49627	343.629	0.30528
mat_12	BS00022036_51	5D	547273761	2	7.39855	0.00118647	-2.00749	13.089	0.000544042	3.80416	6.46198	0.0131424	74	0.131996	6.49627e-05	6.49627	343.629	0.30528
mat_12	wsnp_CAP11_c209_198671	5D	547273711	2	7.39375	0.00120092	1.99771	12.7697	0.000633343	4.10015	6.16	0.0154011	73	0.13666	6.58348e-05	6.58348	334.615	0.30528
mat_12	Kukri_c4074_463	3B	473237497	2	7.37397	0.00123092	-1.42395	12.0538	0.000883871	-2.1053	3.0707	0.0840324	72	0.138778	6.57643e-05	6.57643	728.349	0.30528
mat_12	Kukri_c4599_482	3B	476290232	2	7.32739	0.00126894	-1.30193	10.698	0.00164754	-2.20811	4.41409	0.0391448	73	0.144611	0.146751	6.29461	338.076	0.30528
mat_12	Tdurum_contig4658_418	7B	680171170	2	7.30293	0.001295	-1.79415	11.2423	0.00127729	5.03958	6.87507	0.0106594	73	0.142945	0.264097	6.12484	339.019	0.30528
mat_12	Excalibur_c24593_1217	7A	9109786	1	11.1941	0.00132214	NaN	NaN	NaN	NaN	NaN	NaN	71	0.130905	0.357435	5.63955	325.598	0.30528
mat_12	BS00045330_51	3B	474028891	2	7.25097	0.00135219	-1.38022	10.7832	0.0015829	-2.07553	4.23671	0.0431787	73	0.138735	0.26478	6.11115	339.941	0.30528
mat_12	wsnp_Ex_c5653_9937062	7B	693400415	2	7.2411	0.00136335	-1.19699	13.6881	0.000418896	-0.886521	0.878057	0.351867	73	0.140408	0.191267	6.24502	341.058	0.30528
mat_12	Excalibur_rep_c101263_892	UN	143902421	2	7.22627	0.00140276	-1.07564	10.604	0.00174106	-1.68584	2.88052	0.0940994	71	0.134371	6.22651e-05	6.22651	324.294	0.30528
mat_12	RAC875_c8927_1434	5A	618961446	2	7.20624	0.00140351	-1.94486	13.7462	0.000408165	2.82344	3.52793	0.0643921	73	0.129705	6.581e-05	6.581	339.916	0.30528
mat_12	Kukri_c17082_378	3B	2487569	2	7.16613	0.00146269	-0.600291	1.40239	0.240274	-4.2819	14.2437	0.000330074	72	0.15275	1.12235	4.97122	335.104	0.310921
mat_12	Kukri_rep_c70198_1436	3B	481605122	2	7.12298	0.00150444	1.39552	10.9466	0.00146628	-1.94506	3.65376	0.0599232	73	0.134589	0.262311	6.13235	329.032	0.311997
mat_12	Tdurum_contig54463_316	3B	480567982	2	7.10139	0.00155599	1.33318	11.4734	0.00116188	-2.21245	3.53974	0.0640735	71	0.133772	6.63772e-05	6.63772	331.344	0.311997
mat_12	Excalibur_c29625_243	3B	479675161	2	7.01322	0.00163687	1.30214	11.0093	0.00141591	-1.87759	3.34525	0.0714835	74	0.128056	0.0551411	6.45153	345.346	0.311997
mat_12	GENE-1966_110	3D	369799866	2	7.01322	0.00163687	1.30214	11.0093	0.00141591	-1.87759	3.34525	0.0714835	74	0.128056	0.0551411	6.45153	345.346	0.311997
mat_12	RAC875_c1499_568	UN	438968758	2	7.01708	0.00165618	-1.11917	6.13921	0.0156025	4.13082	11.3396	0.00122828	72	0.172102	1.82896	4.00646	333.304	0.311997
mat_12	Excalibur_c29625_222	3B	479675182	2	7.02751	0.0016679	1.30456	8.18276	0.00559138	-2.76542	5.66789	0.0200442	70	0.149477	0.765466	5.60389	318.858	0.311997
mat_12	Tdurum_contig17421_310	6B	686687722	2	6.98855	0.00170923	-1.36881	6.77299	0.0112882	-3.00446	3.5728	0.0628736	71	0.129989	6.6914e-05	6.6914	326.793	0.31346
mat_12	RAC875_c87052_193	2B	18176415	2	6.87269	0.00189729	1.54611	12.5628	0.000711395	-0.132707	0.0160464	0.899567	70	0.135688	6.73206e-05	6.73206	329.996	0.341256
mat_12	RFL_Contig6053_3082	6A	597790217	2	6.77815	0.00202297	1.50236	7.37837	0.00828513	3.46016	8.01279	0.006037	72	0.136513	0.276395	5.81074	332.253	0.351317
mat_12	GENE-4660_123	7A	68848279	2	6.77499	0.00202835	-0.384519	0.427542	0.51531	-4.97257	13.2735	0.000508474	72	0.238743	2.5311	3.53822	332.583	0.351317
mat_12	IAAV2654	5B	635091863	2	6.69694	0.00215083	-1.35847	8.87777	0.00393346	-1.5082	1.77138	0.187411	73	0.134296	0.589907	5.67593	335.024	0.358489
mat_12	BS00011469_51	5D	546907480	2	6.68824	0.00215204	-1.69117	10.4773	0.00181848	4.56714	6.71279	0.0115521	74	0.129155	0.186458	6.26226	344.629	0.358489
mat_12	BS00011794_51	5D	547273557	2	6.65444	0.00221442	1.68748	10.4023	0.00188408	4.56298	6.70286	0.0116111	74	0.125359	0.199879	6.24537	344.762	0.358489
mat_12	BS00111112_51	7A	67671363	2	6.66597	0.00222307	0.40747	0.432558	0.512863	-4.98311	13.0173	0.000570569	72	0.176977	2.41236	3.66598	332.067	0.358489
mat_12	Kukri_c19883_629	4A	732518956	1	9.83893	0.00245204	NaN	NaN	NaN	NaN	NaN	NaN	75	0.110085	0.569752	5.84328	349.781	0.38871
mat_12	RAC875_c29540_413	1A	504242859	2	6.47559	0.00262811	1.23138	12.4621	0.000738975	-0.816363	0.500754	0.481518	71	0.128061	0.201501	6.46559	331.917	0.409678
mat_12	Kukri_c18055_1740	7A	736518399	2	6.44979	0.00270442	-1.38438	9.77685	0.0025869	3.07647	6.33166	0.0141899	70	0.297374	2.30893	3.0972	320.742	0.414663
mat_12	Excalibur_c35919_107	2A	754461505	2	6.38951	0.00278989	2.81697	12.743	0.000641057	2.61017	3.02463	0.0862831	73	0.123023	0.207847	5.90062	335.769	0.420869
mat_12	Excalibur_c37696_192	5B	711714499	1	9.41516	0.00301926	NaN	NaN	NaN	NaN	NaN	NaN	74	0.0998784	0.324334	6.32777	347.784	0.448241
mat_12	BS00064272_51	5B	656713538	2	6.22446	0.00321056	-2.15384	11.5047	0.0011308	4.98362	3.28475	0.0740954	73	0.114917	6.74955e-05	6.74955	342.162	0.469194
mat_12	BobWhite_c1093_494	5D	548025941	2	6.18012	0.0033545	2.2197	11.3823	0.00120418	-2.11584	2.9076	0.0925348	72	0.133507	0.540349	5.8737	336.952	0.481704
mat_12	BS00084106_51	5B	657714408	2	6.11685	0.00349921	2.15279	11.5722	0.0010893	3.93743	3.73637	0.0571189	74	0.112715	6.70379e-05	6.70379	347.056	0.481704
mat_12	BS00021868_51	5B	656257248	2	6.11102	0.00351674	-2.15279	11.5612	0.00109488	3.93743	3.73281	0.0572346	74	0.114506	6.71019e-05	6.71019	347.022	0.481704
mat_12	wsnp_Ku_c40084_48381107	5B	657414228	2	6.11102	0.00351674	-2.15279	11.5612	0.00109488	3.93743	3.73281	0.0572346	74	0.114506	6.71019e-05	6.71019	347.022	0.481704
mat_12	wsnp_Ra_c10712_17572884	2B	18386107	2	6.11077	0.00358042	1.35384	10.6276	0.00172194	0.265958	0.0614727	0.804909	71	0.116448	6.90322e-05	6.90322	334.548	0.481704
mat_12	Excalibur_c50044_749	7B	6179342	1	8.99666	0.00369762	NaN	NaN	NaN	NaN	NaN	NaN	74	0.0991986	1.22632	5.08008	346.979	0.481704
mat_12	wsnp_Ex_c5418_9575485	3B	586732220	2	6.05851	0.00372114	2.12227	11.9592	0.000923027	-1.70131	1.06986	0.304486	72	0.123801	0.481416	5.75266	333.32	0.481704
mat_12	Kukri_rep_c117029_125	1A	500988691	2	6.04971	0.00372755	1.16489	9.96562	0.00232971	-1.66245	2.97662	0.0887656	73	0.122643	0.575097	5.78799	339.591	0.481704
mat_12	wsnp_RFL_Contig2073_1317762	3B	586732270	2	6.05343	0.00375969	-2.1479	11.9573	0.000930154	-1.70977	1.04768	0.309566	71	0.125232	0.328933	6.06498	332.481	0.481704
mat_12	Excalibur_c18645_857	2D	611529325	1	9.61764	0.00386027	NaN	NaN	NaN	NaN	NaN	NaN	35	0.202045	1.56943	2.84858	152.491	0.483673
mat_12	Ra_c29200_300	1A	546044433	2	5.99687	0.00387849	1.26051	11.7918	0.000984071	0.0801403	0.00744035	0.931498	74	0.113108	0.0359768	6.65133	346.888	0.483673
mat_12	Tdurum_contig74815_1274	7A	11099721	2	5.95961	0.00400467	1.24604	11.0429	0.00139381	-1.65168	2.60011	0.111171	74	0.121621	0.391548	6.0298	348.072	0.491503
mat_12	Excalibur_rep_c69241_274	3B	588474526	2	5.94038	0.00407141	2.19156	11.1653	0.00131628	-1.68571	2.30219	0.133511	74	0.12093	0.619714	5.71739	344.767	0.491503
mat_12	Excalibur_c26662_218	3B	587004142	2	5.91244	0.00417046	-2.18903	11.1038	0.00135465	-1.68031	2.29507	0.134104	74	0.118165	0.656786	5.66635	344.467	0.491503
mat_12	Excalibur_c25678_337	5D	299940284	2	5.91244	0.00417046	-2.18903	11.1038	0.00135465	-1.68031	2.29507	0.134104	74	0.118165	0.656786	5.66635	344.467	0.491503
mat_12	wsnp_Ex_rep_c108951_91954190	1A	504244587	2	5.93522	0.00420897	1.18085	11.771	0.00102722	-0.202751	0.0364371	0.849184	69	0.123201	0.391151	5.70898	317.746	0.491503
mat_12	tplb0025b13_2054	1A	3387885	2	5.88428	0.00427282	-0.341673	0.611869	0.436615	3.20839	8.35511	0.00506221	74	0.123783	0.83953	5.39812	350.098	0.491503
mat_12	Tdurum_contig13048_89	7A	19420624	2	5.84957	0.00445025	1.07958	8.39625	0.00499681	-2.04961	3.04677	0.085224	72	0.125003	1.26224	4.72953	336.055	0.491503
mat_12	Tdurum_contig50731_961	5B	617709959	1	8.60828	0.0044535	NaN	NaN	NaN	NaN	NaN	NaN	75	0.0837198	6.90413e-05	6.90413	352.813	0.491503
mat_12	BS00011795_51	6B	720560817	2	5.83301	0.00446583	-0.949592	6.24488	0.0147051	-2.42243	5.87594	0.0178267	74	0.133295	0.982757	5.21996	344.886	0.491503
mat_12	BobWhite_c28635_785	1B	465589226	2	5.86546	0.00446677	-0.549773	1.86381	0.176686	7.779	10.0321	0.00230425	69	0.251377	2.94637	3.31905	321.591	0.491503
mat_12	RAC875_c79857_301	2B	135007923	2	5.80986	0.00455586	0.795438	3.14592	0.0802874	-3.1321	10.9541	0.00145298	74	0.126625	0.924456	5.29986	344.442	0.495476
mat_12	Excalibur_c19475_619	7A	12407232	2	5.77643	0.00468922	0.0334294	0.0072175	0.932529	-3.25656	11.5438	0.00110376	74	0.127444	1.39389	4.73572	351.546	0.504118
mat_12	BS00063990_51	6B	85790451	2	5.73643	0.00485407	-0.396585	0.438516	0.509925	-4.54235	11.1445	0.00132917	74	0.121901	1.24357	4.91159	345.48	0.511381
mat_12	Excalibur_c8585_701	1B	645571368	2	5.72927	0.00496192	0.307409	0.569654	0.452928	-3.31058	11.0842	0.00139136	71	0.135238	0.996971	4.85353	325.715	0.511381
mat_12	BS00083918_51	6B	720952130	2	5.68142	0.00509055	0.915531	6.12899	0.0156182	-2.32052	5.58737	0.0207539	74	0.123354	0.932026	5.30131	345.189	0.511381
mat_12	RAC875_c4834_694	7B	613176524	2	5.68218	0.00513956	-1.84099	8.72132	0.00426196	4.91615	5.62409	0.0204307	72	0.114426	0.176675	6.57558	341.851	0.511381
mat_12	RAC875_c63889_486	7A	55881525	2	5.67171	0.00518617	0.430481	0.939675	0.335652	-3.01185	11.3178	0.00124078	72	0.137064	1.77432	4.34662	338.039	0.511381
mat_12	wsnp_Ex_c7738_13195349	2B	129662454	2	5.65421	0.00521189	-0.721564	2.82715	0.0969564	-3.25073	10.5582	0.00175029	74	0.116044	0.771529	5.5249	346.742	0.511381
mat_12	RFL_Contig1633_304	2B	130342853	2	5.65421	0.00521189	-0.721564	2.82715	0.0969564	-3.25073	10.5582	0.00175029	74	0.116044	0.771529	5.5249	346.742	0.511381
mat_12	GENE-0644_421	2A	83821315	2	5.65382	0.00521366	0.722995	2.84399	0.0959856	-3.25284	10.5494	0.00175754	74	0.118283	0.755213	5.55278	350.627	0.511381
mat_12	wsnp_Ku_c792_1636348	7A	11100160	2	5.63628	0.00529344	-1.33102	10.3543	0.0019274	-1.87317	3.13936	0.0805971	74	0.112028	0.465359	5.96633	348.295	0.511381
mat_12	GENE-2970_274	5B	617820713	1	8.24224	0.0053341	NaN	NaN	NaN	NaN	NaN	NaN	75	0.0794163	0.0637496	6.81173	353.364	0.511381
mat_12	GENE-2935_850	7B	1026015	1	8.23228	0.00537864	NaN	NaN	NaN	NaN	NaN	NaN	74	0.0896094	0.330208	6.3531	348.642	0.511381
mat_12	Excalibur_c13239_85	2A	83816473	2	5.59568	0.00551002	-0.720253	2.81959	0.0974551	-3.2639	10.4432	0.00185762	73	0.115603	0.680592	5.72636	341.149	0.511381
mat_12	Tdurum_contig83066_276	2B	133689843	2	5.57702	0.0055725	-0.725332	2.91643	0.0919314	-3.07245	10.4396	0.00185114	74	0.11676	0.620879	5.74032	341.922	0.511381
mat_12	GENE-0644_370	2A	83821264	2	5.56118	0.00567712	0.707653	2.65764	0.107421	-3.24633	10.4457	0.00185541	73	0.118354	0.825527	5.52671	339.752	0.511381
mat_12	BS00022657_51	2B	132340583	2	5.56118	0.00567712	0.707653	2.65764	0.107421	-3.24633	10.4457	0.00185541	73	0.118354	0.825527	5.52671	339.752	0.511381
mat_12	GENE-0644_42	2B	135000380	2	5.56118	0.00567712	0.707653	2.65764	0.107421	-3.24633	10.4457	0.00185541	73	0.118354	0.825527	5.52671	339.752	0.511381
mat_12	RAC875_c96399_610	2A	758388411	2	5.55932	0.00568626	-0.12513	0.0277877	0.868076	6.22504	9.94108	0.0023571	73	0.131723	1.63206	4.56748	341.454	0.511381
mat_12	BS00039641_51	4A	702070394	2	5.51844	0.00586315	0.736732	1.10237	0.29721	3.63519	6.38118	0.0137025	74	0.130602	1.74734	4.40007	345.799	0.519361
mat_12	RFL_Contig2163_1080	6D	3853247	2	5.51395	0.00588606	0.25012	0.267974	0.60626	-2.93565	8.37251	0.00501897	74	0.119527	0.722753	5.61033	346.534	0.519361
mat_12	Ku_c27771_508	3B	495471559	2	5.48947	0.00604125	-1.21518	8.5104	0.00470698	-2.02813	3.50718	0.0651635	73	0.110398	0.355761	6.26396	344.324	0.528073
mat_12	wsnp_CAP8_rep_c3938_1936666	1A	547215683	2	5.46798	0.00615496	-1.1074	10.6529	0.00168278	-0.422476	0.190133	0.664111	73	0.10123	0.0414415	6.35269	336.51	0.533031
mat_12	wsnp_Ex_c28679_37784954	3A	744434003	2	5.4615	0.0062196	0.31909	0.710157	0.402222	-2.84578	10.3863	0.00191822	72	0.128383	1.57299	4.7043	338.546	0.533687
mat_12	RFL_Contig4167_1164	5D	519651394	2	5.4182	0.00639727	1.14376	9.66804	0.00267342	1.55472	2.29015	0.134515	74	0.119362	0.594541	5.82638	342.209	0.543943
mat_12	wsnp_BE499478B_Ta_2_1	2B	139814509	2	5.3858	0.00661062	-0.696829	2.41444	0.124606	-3.40772	10.2192	0.00206519	73	0.12588	1.22502	5.0717	343.057	0.557019
mat_12	wsnp_CAP11_c78_114341	7A	610930166	2	5.37408	0.00667836	0.464326	0.528519	0.469587	5.85489	10.742	0.00161379	73	0.350772	3.03518	3.32652	341.839	0.557702
mat_12	IAAV6309	6D	2268889	2	5.3677	0.00674699	1.20808	9.49408	0.00293267	1.8963	2.8722	0.0945039	72	0.121992	1.11643	4.99579	330.715	0.558448
mat_12	BS00049644_51	2A	605184906	2	5.32622	0.00696251	0.908387	3.03809	0.0856006	2.8079	7.28827	0.0086443	73	0.11573	0.47301	5.87435	342.288	0.571231
mat_12	CAP7_c1208_150	6D	2269135	2	5.31884	0.00703971	0.465624	0.288966	0.592565	3.91027	5.79277	0.0186958	72	0.157811	1.46361	4.86147	340.264	0.572543
mat_12	wsnp_Ku_rep_c109724_94227136	6D	268066200	2	5.29604	0.00718068	1.21494	10.1371	0.00215813	0.607264	0.443784	0.507461	72	0.104922	0.131784	6.73256	344.224	0.572812
mat_12	IAAV4351	4A	594211568	2	5.29457	0.00718989	-1.08937	8.9315	0.00384765	0.949123	0.968497	0.328397	72	0.114432	0.875417	5.06726	335.251	0.572812
mat_12	RAC875_rep_c106400_276	2D	87741508	2	5.28348	0.00722675	-0.623944	1.97073	0.164669	-3.35191	10.1277	0.00215683	73	0.133336	1.47413	4.78228	341.438	0.572812
mat_12	Ex_c101666_634	7B	24060479	2	5.25179	0.00739685	-1.0283	7.29719	0.00858113	-1.19584	1.45465	0.231677	74	0.135504	0.701059	5.69214	344.307	0.581368
mat_12	Kukri_c1106_1489	5A	481670287	2	5.18006	0.00798014	1.26721	7.4323	0.00808854	-3.14512	5.05467	0.0277107	71	0.129133	1.00032	4.96268	324.624	0.617407
mat_12	wsnp_Ex_c5457_9632050	3B	493120756	2	5.27148	0.00798742	-1.21793	5.02541	0.0289581	-3.02943	7.61245	0.00781729	57	0.127895	6.65285e-05	6.65285	260.357	0.617407
mat_12	RAC875_c13722_326	7A	22896064	1	7.38688	0.00824975	NaN	NaN	NaN	NaN	NaN	NaN	72	0.080285	0.430262	6.0136	337.249	0.632458
mat_12	Kukri_c19198_379	2A	716457106	2	5.1162	0.00840004	0.493137	0.599931	0.441176	6.02583	10.2085	0.00208638	72	0.11633	1.77624	4.13976	331.171	0.633719
mat_12	Tdurum_contig81947_779	7A	733815485	2	5.11674	0.00843304	-1.12948	6.31222	0.0142982	3.24807	6.66213	0.0119455	71	0.148499	1.89929	3.84525	327.947	0.633719
mat_12	wsnp_Ex_rep_c66423_64641115	1D	415415807	2	5.10406	0.00848964	-0.868734	5.01933	0.0281964	-2.23827	3.73419	0.0572995	72	0.108751	0.711298	5.8148	338.835	0.633719
mat_12	tplb0021a17_853	6B	678175475	2	5.06508	0.00871155	2.03076	8.15493	0.00558843	-0.466517	0.0800378	0.778047	74	0.0988075	0.213018	6.46969	347.367	0.633719
mat_12	Kukri_c7087_896	3A	594000726	2	5.06463	0.00871496	-1.86141	9.43137	0.00299574	-1.54103	1.90299	0.171955	74	0.102602	0.573843	5.89008	345.03	0.633719
mat_12	Tdurum_contig85266_280	7B	6153848	2	5.06161	0.00873816	1.37068	9.75465	0.00256466	-0.30067	0.0897992	0.765284	74	0.153282	1.3213	4.94915	349.331	0.633719
mat_12	Tdurum_contig31235_99	3A	739397060	2	5.02663	0.00904734	0.208224	0.331554	0.566541	-2.61754	9.7151	0.00262574	73	0.123647	1.27425	5.02163	341.124	0.633719
mat_12	wsnp_Ex_c7291_12517871	2B	72580210	2	4.98977	0.00934488	1.8727	9.44199	0.00299351	-1.5773	1.74535	0.190645	73	0.104926	0.496756	6.08821	341.207	0.633719
mat_12	Ra_c9061_2115	3B	595694108	2	4.98977	0.00934488	1.8727	9.44199	0.00299351	-1.5773	1.74535	0.190645	73	0.104926	0.496756	6.08821	341.207	0.633719
mat_12	Tdurum_contig30451_88	2A	603687247	2	4.98489	0.00942335	0.886393	2.72571	0.103161	2.82158	6.29679	0.0143789	72	0.111087	0.568216	5.83686	340.427	0.633719
mat_12	GENE-4592_95	7A	12909662	1	7.12827	0.00945372	NaN	NaN	NaN	NaN	NaN	NaN	70	0.100317	0.591675	6.16254	331.558	0.633719
mat_12	Tdurum_contig75814_655	6A	571685421	2	4.98585	0.00945499	0.523977	1.36513	0.246613	7.94327	9.49169	0.00294969	71	0.139271	1.86523	4.3906	331.923	0.633719
mat_12	RAC875_c36670_72	5B	671193127	2	4.97412	0.00951282	1.35987	9.52105	0.00289496	-0.153672	0.0193852	0.889662	72	0.151122	1.21905	5.17166	339.073	0.633719
mat_12	Tdurum_contig56661_291	3B	593869260	2	4.95603	0.00962603	-1.86876	9.37096	0.00309767	-1.57191	1.73933	0.191403	73	0.104061	0.535136	6.03439	342.021	0.633719
mat_12	Ku_c9822_828	3B	595288710	2	4.95603	0.00962603	-1.86876	9.37096	0.00309767	-1.57191	1.73933	0.191403	73	0.104061	0.535136	6.03439	342.021	0.633719
mat_12	wsnp_JD_c10602_11238420	3B	596429959	2	4.95603	0.00962603	-1.86876	9.37096	0.00309767	-1.57191	1.73933	0.191403	73	0.104061	0.535136	6.03439	342.021	0.633719
mat_12	IAAV1801	3B	699693852	2	4.95603	0.00962603	-1.86876	9.37096	0.00309767	-1.57191	1.73933	0.191403	73	0.104061	0.535136	6.03439	342.021	0.938656
mat_12	Kukri_rep_c86903_184	3D	591873035	2	4.94603	0.0097502	1.16708	4.97476	0.0288815	-4.01029	7.70449	0.00703678	72	0.112803	1.44847	4.92722	339.612	0.633719
mat_12	wsnp_Ex_rep_c104859_89444355	4A	570477860	2	4.9143	0.00994722	1.22404	9.43333	0.00299292	1.22473	1.2	0.276922	74	0.108768	1.029	5.30668	338.994	0.633719
mat_12	wsnp_Ku_c13952_22097895	1D	494149272	2	4.93713	0.0099964	0.989948	2.76799	0.100838	2.53025	4.87763	0.0306321	68	0.128208	1.12355	5.16062	321.941	0.633719
mat_12	Kukri_rep_c106786_230	2B	33839836	2	4.93518	0.0101068	-0.669364	2.21654	0.141375	6.53029	6.39944	0.0138491	66	0.132021	2.18481	4.14002	312.191	0.633719
mat_12	BS00087178_51	6A	432246854	2	4.89496	0.0101183	1.02424	2.46076	0.121047	7.50432	8.32674	0.00513351	74	0.115193	1.41372	4.89466	346.696	0.633719
mat_12	Kukri_c51781_199	1A	568547511	2	4.90573	0.0101426	-1.16537	9.54911	0.00286968	0.468805	0.233482	0.630462	71	0.0979608	0.110664	6.41558	325.294	0.633719
mat_12	wsnp_Ex_c22984_32207214	1D	335074144	2	4.89557	0.0101518	1.70862	9.70102	0.00264351	-1.61987	1.52831	0.220384	73	0.106824	0.829507	5.65618	342.429	0.633719
mat_12	wsnp_Ex_c55986_58282517	1A	497520528	2	4.89006	0.0101621	1.23172	8.08528	0.00578467	0.867038	0.575205	0.45064	74	0.105887	0.368948	6.23958	345.226	0.633719
mat_12	wsnp_Ex_c23598_32826926	1A	567979211	2	4.8789	0.0104272	-1.24873	9.72752	0.00264833	0.0801673	0.00680529	0.934493	70	0.118179	1.16206	5.07836	328.957	0.633719
mat_12	Tdurum_contig11613_329	5B	172748173	2	4.8509	0.0105193	1.54437	5.17064	0.0259127	-1.34491	1.00764	0.318784	74	0.100505	0.602855	5.89177	347.229	0.633719
mat_12	wsnp_Ex_c28679_37784735	3A	744434358	2	4.84585	0.0105663	-0.454894	1.36333	0.246761	-2.38268	8.88129	0.00391128	74	0.138493	1.63459	4.62016	348.136	0.633719
mat_12	wsnp_Ku_c2725_5163091	2B	189617031	2	4.84082	0.0106134	-0.881652	1.92996	0.168986	6.55802	6.4351	0.013326	74	0.12362	1.63925	4.60937	347.468	0.633719
mat_12	RFL_Contig5166_1049	6A	79263114	2	4.865	0.0106457	-0.438299	0.931608	0.337916	-3.19641	7.52463	0.0078004	68	0.155739	1.98939	4.29138	320.818	0.633719
mat_12	Kukri_c1281_515	6A	433964575	2	4.84163	0.0106459	1.15662	2.40033	0.125694	7.57484	8.39392	0.00498415	73	0.109249	1.4207	4.92093	342.286	0.633719
mat_12	RAC875_c75528_355	7A	79648857	2	4.83732	0.0106462	-0.456783	0.639649	0.426433	-3.9827	9.67283	0.00266728	74	0.286314	2.08641	4.16409	346.597	0.633719
mat_12	BS00075001_51	1D	414303421	2	4.83404	0.0106771	-0.710797	3.92086	0.0514601	-2.65324	4.66798	0.0340125	74	0.105715	0.901928	5.47734	346.918	0.633719
mat_12	Tdurum_contig47317_100	7B	675149642	2	4.82628	0.0107505	-0.46949	0.238404	0.626825	-5.45414	8.55438	0.00458954	74	0.140883	1.20601	5.09677	347.406	0.633719
mat_12	BobWhite_rep_c63429_271	4A	570478598	2	4.82728	0.0107813	-1.20596	9.20343	0.00335859	1.28523	1.24043	0.269093	73	0.101551	0.751961	5.74654	345.491	0.633719
mat_12	BobWhite_c47709_141	7A	67671537	2	4.83118	0.0107858	-0.389062	0.410983	0.523535	-4.96248	9.61672	0.00276522	72	0.204806	1.96074	4.17645	339.132	0.633719
mat_12	Kukri_c29396_58	7B	675318832	2	4.8146	0.010862	0.472804	0.241785	0.624395	-5.45054	8.53512	0.00463315	74	0.111501	1.16776	5.14417	346.976	0.633719
mat_12	GENE-0511_161	1A	511100255	2	4.81362	0.010912	0.662052	2.93834	0.0908019	-2.44738	4.68	0.033836	73	0.105907	0.851497	5.6299	338.29	0.633719
mat_12	wsnp_BF293133A_Ta_2_2	3A	11838999	2	4.80883	0.0110002	0.717627	1.57314	0.213865	5.23507	9.52611	0.00288795	72	0.116102	2.04004	4.31842	340.019	0.633719
mat_12	GENE-1464_73	3A	743874374	2	4.80369	0.011008	0.353835	0.83851	0.36288	-2.51485	8.99055	0.00372358	73	0.133135	1.56879	4.79569	345.885	0.633719
mat_12	IACX7841	5A	485841357	2	4.78985	0.0111022	-1.7408	8.94595	0.00379	3.31916	2.6954	0.10494	74	0.101933	0.0811433	6.76276	345.253	0.633719
mat_12	tplb0047k12_1370	1D	69096996	2	4.78381	0.0112028	-1.16693	2.47193	0.12028	7.54617	8.25871	0.00532739	73	0.119164	1.30358	5.05378	343.542	0.633719
mat_12	Excalibur_c29748_596	6B	719717000	2	4.77637	0.0112767	-0.663029	3.34898	0.071386	-2.62103	6.07341	0.0161109	73	0.116359	1.128	5.2853	341.36	0.633719
mat_12	wsnp_BE490763B_Ta_2_2	2B	563859648	2	4.77371	0.0113032	-0.14581	0.0658381	0.798228	5.73599	8.8271	0.00403174	73	0.137734	1.52011	4.58307	341.145	0.633719
mat_12	BS00064039_51	3B	571302940	2	4.77441	0.0114281	0.870047	4.38428	0.0399479	-2.67073	5.0584	0.0277017	70	0.121412	1.93429	4.40378	330.578	0.633719
mat_12	BS00042131_51	3D	614366302	2	4.76167	0.0115112	0.223478	0.331734	0.566487	7.47436	9.26634	0.00328682	71	0.287548	2.59444	3.50653	339.397	0.633719
mat_12	wsnp_Ex_c15475_23756906	3A	688690622	2	4.75637	0.0115207	0.0265642	0.00184829	0.965829	4.07017	8.19498	0.00551714	72	0.15514	2.3839	4.02481	340.741	0.633719
mat_12	BS00012023_51	6A	23876277	2	4.7444	0.0115576	-1.09861	2.24472	0.138383	7.56787	8.38248	0.00499439	74	0.12441	1.34565	4.95503	347.914	0.633719
mat_12	BS00021702_51	1D	414565852	2	4.74158	0.0116286	-0.720374	3.16305	0.079544	-2.17674	4.31135	0.0414295	73	0.104382	1.28627	5.05096	344.961	0.633719
mat_12	BobWhite_c13202_399	6D	470629012	2	4.73306	0.0117164	0.646922	2.98366	0.0883965	-2.54334	6.60157	0.0122602	73	0.104793	0.872525	5.35028	339.095	0.633719
mat_12	RAC875_c13696_226	UN	476471576	2	4.72333	0.0117752	0.617998	1.28257	0.261128	3.14534	9.27292	0.00323395	74	0.104949	0.672359	5.80733	346.844	0.633719
mat_12	Excalibur_c80601_278	2B	713675960	2	4.73022	0.0117895	-0.958406	7.16963	0.00920431	-1.18831	1.23721	0.269762	72	0.094506	0.107945	6.85465	340.236	0.633719
mat_12	wsnp_Ra_c11877_19161832	6A	603094960	2	4.72024	0.011939	-1.09168	9.39517	0.00308945	-0.248049	0.0455837	0.831555	71	0.0992752	0.273176	6.64692	334.905	0.972651
mat_12	GENE-4277_295	7D	20064069	2	4.68161	0.0122619	-1.1315	8.8862	0.00391735	-1.43873	1.48258	0.227347	73	0.104409	0.680382	5.9067	342.033	0.644778
mat_12	BS00091891_51	7A	77434953	2	4.6785	0.0123865	-0.802427	2.41992	0.124311	3.06557	8.26776	0.00534239	71	0.106433	0.72077	5.8266	332.482	0.644778
mat_12	BS00065783_51	5D	69456300	2	4.66218	0.0124309	0.964479	6.21567	0.0149298	-2.12645	3.97429	0.0499367	74	0.0986992	0.705559	5.77472	348.389	0.644778
mat_12	GENE-4074_537	6B	135127501	2	4.66827	0.0124525	-0.337146	0.514917	0.475372	-3.03461	7.85228	0.0065375	72	0.112972	1.92524	4.39593	341.055	0.644778
mat_12	BS00080751_51	2A	718355354	2	4.65891	0.0124669	0.368925	0.262873	0.609701	4.03731	8.83698	0.00399674	74	0.138946	2.12853	4.14532	347.869	0.644778
mat_12	BS00022355_51	1A	7658679	2	4.65076	0.0125573	1.3673	2.55353	0.114368	2.49354	2.52175	0.116608	74	0.115171	1.46873	4.82389	345.018	0.644778
mat_12	wsnp_Ex_rep_c106085_90293854	2B	189594654	2	4.64719	0.0125972	-0.212098	0.0639073	0.801134	4.59905	6.95991	0.010182	74	0.119946	1.74832	4.53956	352.346	0.644778
mat_12	RFL_Contig2615_700	2D	576280587	2	4.64293	0.0126449	0.656306	3.2884	0.0738813	-2.47199	5.80786	0.0184755	74	0.114443	1.16653	5.19152	339.807	0.644778
mat_12	Tdurum_contig28304_335	7D	586486103	2	4.63939	0.0126846	0.576958	1.82679	0.180681	-2.04337	5.42576	0.0226118	74	0.101423	1.1421	5.2551	347.068	0.644778
mat_12	RAC875_c44365_203	3B	474403328	2	4.63613	0.0128114	1.18018	9.22323	0.00334096	-0.310939	0.0395862	0.842861	72	0.0864709	6.83486e-05	6.83486	335.121	0.647704
mat_12	BS00089894_51	1A	497522625	2	4.62207	0.0128811	-1.17041	9.24022	0.00328553	-0.495728	0.227752	0.634621	74	0.0960587	0.601717	5.92505	347.933	0.647725
mat_12	RAC875_c17011_373	6B	720498494	2	4.61165	0.0130008	-0.655635	3.34178	0.0716274	-2.47021	5.74299	0.019117	74	0.107047	1.0561	5.32916	347.223	0.650249
mat_12	tplb0051b16_1324	2D	299527034	2	4.58546	0.0133522	1.16926	7.81131	0.00665035	1.88578	2.94412	0.0904911	73	0.102481	0.735668	5.7369	345.715	0.653767
mat_12	CAP12_c1085_283	1B	662021267	2	4.64634	0.0135103	1.4234	9.28523	0.00349718	0.711982	0.0902256	0.764983	58	0.130647	2.71869	2.83133	267.186	0.653767
mat_12	Kukri_c2634_487	4A	541361639	2	4.57477	0.0135749	0.88623	6.29908	0.0143955	-2.25402	3.98685	0.0497465	71	0.117095	0.837475	5.52773	335.068	0.653767
mat_12	BS00064146_51	7B	655818377	2	4.56573	0.013588	-0.567804	1.68924	0.197847	-2.07389	5.50848	0.0216783	73	0.104005	1.19494	5.21803	343.335	0.653767
mat_12	Tdurum_contig66398_976	7B	23441058	2	4.5687	0.0135994	-0.889326	5.60342	0.0206548	-1.90646	2.36247	0.12873	72	0.110315	0.700323	5.92965	342.642	0.653767
mat_12	wsnp_Ex_c7246_12443506	2B	133006973	2	4.56473	0.0136001	-0.695151	2.5345	0.115763	-3.01724	8.37515	0.0050304	73	0.101375	0.933136	5.35897	340.643	0.653767
mat_12	RAC875_c35010_187	7A	10389204	2	4.58425	0.0136699	1.04106	8.53983	0.00475375	-0.972035	0.292311	0.590563	67	0.106674	0.508114	5.57916	309.036	0.653767
mat_12	Excalibur_c18410_136	3B	752091260	2	4.55067	0.0137247	1.049	9.07437	0.00356059	-0.262211	0.0739253	0.786473	74	0.0945343	0.375791	6.30931	347.92	0.653767
mat_12	BS00066108_51	3B	95155547	2	4.54965	0.0137371	1.40543	8.89534	0.00388459	-1.03269	1.21484	0.273996	74	0.0901139	0.0922696	6.7806	356.303	0.653767
mat_12	wsnp_Ex_c11229_18163892	3A	744380141	2	4.54639	0.0138233	0.365245	0.865991	0.355177	-2.40769	8.47794	0.00478258	73	0.105413	1.62512	4.81948	342.984	0.653767
mat_12	Tdurum_contig18174_283	5B	100030620	2	4.56169	0.0138883	-1.15162	9.10426	0.00360301	-0.261894	0.0622271	0.803773	68	0.099994	0.307421	6.11002	316.65	0.653767
mat_12	wsnp_Ku_c5359_9531713	3B	822197226	2	4.55969	0.0139128	-0.474372	1.39348	0.241992	-3.24208	8.28571	0.0053578	68	0.138087	1.98592	4.47249	320.978	0.653767
mat_12	Excalibur_c74925_338	7B	656882621	2	4.53695	0.0139875	-0.559481	1.60988	0.208652	-2.17687	5.55162	0.0212279	72	0.101766	1.26098	5.21708	339.979	0.653767
mat_12	BS00039118_51	7B	656929210	2	4.52088	0.0141401	-0.56855	1.73399	0.192078	-2.02916	5.2125	0.0253791	73	0.102181	0.930319	5.56995	337.325	0.653767
mat_12	BS00073898_51	6B	676152236	2	4.51416	0.0141777	1.18387	5.30778	0.0240791	-1.09465	0.98263	0.324825	74	0.0946121	0.553358	6.01588	348.546	0.653767
mat_12	Tdurum_contig42584_1190	7B	750588999	2	4.49969	0.0143614	1.10708	8.9653	0.00375447	0.830279	0.567498	0.453678	74	0.103025	0.689193	5.82338	347.704	0.653767
mat_12	BS00036352_51	3B	493122619	2	4.49284	0.0145457	-1.48997	7.56557	0.00754256	-1.9908	2.57453	0.113035	72	0.0892984	0.0783185	6.95063	351.324	0.653767
mat_12	Ex_c8832_2521	2B	190015945	2	4.48346	0.0145705	0.240317	0.0836843	0.773185	4.5052	6.63316	0.0120339	74	0.101651	1.49264	4.82958	348.003	0.653767
mat_12	Excalibur_rep_c107558_367	2D	133752213	2	4.48346	0.0145705	0.240317	0.0836843	0.773185	4.5052	6.63316	0.0120339	74	0.101651	1.49264	4.82958	348.003	0.653767
mat_12	wsnp_Ra_c46023_52004149	5D	103214091	2	4.48346	0.0145705	0.240317	0.0836843	0.773185	4.5052	6.63316	0.0120339	74	0.101651	1.49264	4.82958	348.003	0.653767
mat_12	Excalibur_c7255_697	7D	13602328	1	6.29334	0.0145836	NaN	NaN	NaN	NaN	NaN	NaN	67	0.0746722	0.561573	6.47689	318.572	0.653767
mat_12	BobWhite_rep_c65013_174	4A	545603552	2	4.48796	0.0146089	-1.42641	8.59009	0.00454401	0.434988	0.115359	0.735126	72	0.107384	0.944051	5.20205	335.634	0.653767
mat_12	RAC875_rep_c108382_824	7D	633604438	2	4.4508	0.0152581	-0.81944	5.14384	0.0265095	2.40034	3.69715	0.0586947	69	0.100689	0.857978	5.74418	325.344	0.66123
mat_12	IAAV912	7A	19420534	2	4.42726	0.0153189	1.05525	7.66394	0.00713597	-0.954482	0.961015	0.330169	74	0.0942835	0.815058	5.65673	346.001	0.66123
mat_12	BS00047901_51	2D	15967348	2	4.42285	0.0153792	0.120408	0.0564779	0.812818	-4.70898	8.72959	0.004212	74	0.125415	1.64606	4.67975	349.109	0.66123
mat_12	BS00023201_51	1A	7643102	2	4.41695	0.0154605	-0.397951	0.375657	0.541841	4.10369	6.17236	0.0152697	74	0.100509	1.14303	5.26226	351.851	0.66123
mat_12	RFL_Contig1284_640	5A	564595376	2	4.42331	0.0154726	1.23441	8.54935	0.0046355	-0.748935	0.608337	0.438007	72	0.0974875	0.786827	5.86807	340.866	0.66123
mat_12	RAC875_c10819_636	5B	619133328	1	6.14652	0.0154764	NaN	NaN	NaN	NaN	NaN	NaN	74	0.073493	0.279247	6.67995	350.804	0.66123
mat_12	Kukri_c1831_1243	4A	714176849	2	4.42018	0.0155158	-0.719538	3.14794	0.0803099	-2.57602	5.25691	0.0248253	72	0.159591	1.86182	3.94669	329.717	0.66123
mat_12	TA001002-0479	7A	19420764	2	4.42018	0.0155158	-0.719538	3.14794	0.0803099	-2.57602	5.25691	0.0248253	72	0.159591	1.86182	3.94669	329.717	0.66123
mat_12	Kukri_c1728_1876	3D	63407713	2	4.41351	0.0155572	-1.27098	8.36164	0.00506394	0.0460312	0.00196256	0.964787	73	0.095919	0.630842	5.98671	343.83	0.66123
mat_12	D_F5XZDLF01B7ECX_54	7D	475148205	1	6.14247	0.0156111	NaN	NaN	NaN	NaN	NaN	NaN	71	0.0648364	0.00581654	7.02454	335.496	0.66123
mat_12	Ra_c105707_788	3D	13422868	2	4.41157	0.0156873	1.16575	8.82054	0.00407756	-0.626526	0.212226	0.646456	71	0.0956976	0.615017	6.11415	332.443	0.66123
mat_12	Ra_c7673_1773	6B	703287272	1	6.11242	0.0157212	NaN	NaN	NaN	NaN	NaN	NaN	75	0.0671574	0.342854	6.51186	353.838	0.66123
mat_12	RAC875_c17224_741	6B	704187556	1	6.11242	0.0157212	NaN	NaN	NaN	NaN	NaN	NaN	75	0.0671574	0.342854	6.51186	353.838	0.66123
mat_12	IAAV868	1D	409500532	1	6.11098	0.0157655	NaN	NaN	NaN	NaN	NaN	NaN	74	0.0627521	0.214119	6.78122	350.733	0.66123
mat_12	Tdurum_contig38751_317	3B	813950898	2	4.38818	0.0160713	0.770345	3.39607	0.0696479	-1.81102	3.5739	0.0628942	70	0.09632	1.0833	5.1727	327.395	0.666006
mat_12	Kukri_c36758_140	1B	658712499	2	4.373	0.0161292	-1.27444	8.66873	0.00435579	-0.128773	0.0184524	0.892327	73	0.0980483	0.596268	6.0396	343.127	0.666006
mat_12	wsnp_Ex_c10886_17694220	4A	539295551	2	4.36802	0.0161505	-1.00822	7.15074	0.00924109	-1.7137	3.15209	0.0799977	74	0.11432	1.19831	5.18123	349.404	0.666006
mat_12	Excalibur_c373_1347	7D	576747277	2	4.35957	0.0163757	-1.64363	7.89044	0.0064147	2.4911	2.92879	0.0913785	72	0.0960415	0.407007	6.39772	338.995	0.666006
mat_12	Ra_c37920_342	4A	545601978	2	4.36016	0.0164207	1.42918	8.59089	0.00456012	0.73852	0.308868	0.580148	71	0.122907	0.998104	5.14287	329.998	0.666006
mat_12	Ku_c8631_308	3B	467046893	2	4.34043	0.0165536	-1.29606	5.32945	0.0238022	-2.15414	4.42509	0.03886	74	0.090241	0.374597	6.32264	348.997	0.666006
mat_12	RAC875_c52566_551	2B	126949293	2	4.35062	0.0165605	0.715024	2.63109	0.109285	-3.14063	8.01534	0.00605052	71	0.101796	0.839676	5.59973	331.845	0.666006
mat_12	Ra_c10284_405	3D	209687012	2	4.33471	0.0166384	1.155	4.71854	0.0330871	-3.74048	6.56298	0.0124759	74	0.127339	1.48395	4.85681	348.416	0.666006
mat_12	wsnp_Ex_c4927_8772847	3B	96844320	2	4.33933	0.0166736	1.39846	8.65984	0.00439176	-0.889904	0.794719	0.375688	72	0.0867165	7.06869e-05	7.06869	341.562	0.666006
mat_12	BS00075731_51	7A	731882506	1	5.99773	0.0167253	NaN	NaN	NaN	NaN	NaN	NaN	74	0.0845242	1.43312	5.1186	350.312	0.666006
mat_12	wsnp_Ex_c1482_2835665	7A	596688552	2	4.34209	0.0167999	0.443666	0.478371	0.491516	7.32633	8.52893	0.00473837	69	0.136714	2.65897	3.5935	325.566	0.666006
mat_12	wsnp_Ex_rep_c69024_67924125	1D	412090390	2	4.32752	0.01685	-0.749113	3.69176	0.0586965	-2.04006	3.22998	0.0765542	72	0.0981329	0.695653	5.98389	339.666	0.666006
mat_12	BS00037002_51	6A	2972633	2	4.31718	0.0169013	0.711839	0.905793	0.344374	7.51562	8.36881	0.00502814	74	0.103426	1.70991	4.61745	349.352	0.666006
mat_12	Excalibur_rep_c70658_301	3B	752091794	2	4.31838	0.0169878	-1.06461	8.52995	0.00467973	-0.685053	0.486434	0.4878	72	0.091263	0.33109	6.53926	340.117	0.666006
mat_12	BS00030534_51	3B	466615535	2	4.30539	0.0170804	1.29091	5.25834	0.0247238	-2.15365	4.41782	0.039016	74	0.0945014	0.39262	6.314	348.613	0.666006
mat_12	wsnp_Ku_c19631_29148397	3B	469785730	2	4.30166	0.0171896	1.32758	5.46061	0.0222357	-2.27692	4.43892	0.0386131	73	0.0892405	0.358033	6.44678	344.738	0.666006
mat_12	wsnp_Ku_c26257_36216869	3B	470046620	2	4.30166	0.0171896	1.32758	5.46061	0.0222357	-2.27692	4.43892	0.0386131	73	0.0892405	0.358033	6.44678	344.738	0.666006
mat_12	Kukri_c28517_372	6B	704303506	1	5.9347	0.0172522	NaN	NaN	NaN	NaN	NaN	NaN	75	0.0689239	0.393902	6.48909	353.886	0.666006
mat_12	BS00022158_51	1A	516373207	2	4.29283	0.0172735	1.06062	4.54634	0.0363537	-2.59328	6.61565	0.0121426	74	0.106182	1.25784	5.12288	346.835	0.666006
mat_12	Tdurum_contig20262_440	2B	18931800	2	4.305	0.0173035	-1.06346	8.59547	0.00456832	0.204586	0.0156544	0.900794	70	0.0893647	7.11943e-05	7.11943	332.756	0.666006
mat_12	IAAV5835	3B	618155098	2	4.29763	0.0174173	0.310506	0.583606	0.447507	3.47667	8.54925	0.00467246	70	0.115896	2.12558	3.97673	331.255	0.666667
mat_12	RFL_Contig4626_873	6D	91819922	2	4.28062	0.0174632	1.86926	8.55832	0.00458068	-1.49007	0.901182	0.345597	74	0.093662	0.766631	5.74681	350.396	0.666667
mat_12	Kukri_c13761_379	4A	707040330	2	4.27267	0.0176949	1.47094	7.37904	0.00828231	2.11774	2.74919	0.101716	72	0.099138	0.658895	6.02202	338.794	0.668862
mat_12	Excalibur_c11947_746	1D	22883966	2	4.27293	0.0178041	1.11677	8.17109	0.00562356	-1.49258	1.82081	0.181628	70	0.0894763	0.228603	6.60557	334.931	0.668862
mat_12	Ku_c12191_1123	3A	737800156	2	4.27311	0.0178605	-0.953673	6.19709	0.0152475	2.128	3.34974	0.0715984	69	0.101153	0.929578	5.66218	321.715	0.668862
mat_12	BS00039686_51	2B	694055764	2	4.25826	0.0178695	-0.525347	0.633	0.428872	7.24881	8.25342	0.00534132	73	0.104607	2.05398	4.0991	340.694	0.668862
mat_12	RAC875_c34757_180	2A	70877024	2	4.26112	0.0178783	1.1338	8.07494	0.00585414	-1.39336	1.83558	0.179765	72	0.0916873	0.488723	6.29408	340.383	0.668862
mat_12	RAC875_c55313_89	3A	60005427	2	4.24727	0.0181008	-0.0236649	0.00334712	0.954027	-2.87742	8.49393	0.00476303	72	0.101862	1.37439	5.12483	340.422	0.674488
mat_12	wsnp_Ex_c30239_39179460	7A	24591506	2	4.23313	0.0183308	-1.01922	8.45628	0.00485176	-0.268917	0.0755532	0.784215	72	0.0960983	0.589972	6.17998	339.934	0.67582
mat_12	wsnp_BF473884A_Ta_1_3	7A	71140908	2	4.22446	0.0183641	0.353588	0.364562	0.547855	-3.33109	8.26156	0.00530138	74	0.173648	2.14101	4.20542	349.736	0.67582
mat_12	Ra_c27641_452	3A	438266950	2	4.24292	0.0184082	-0.168272	0.0991508	0.75383	7.41843	8.48509	0.00486098	68	0.17355	1.9407	4.17596	319.251	0.67582
mat_12	IAAV7376	4A	538486664	2	4.21603	0.0185574	1.0079	7.22425	0.00892829	-1.616	2.44519	0.122271	73	0.0966499	0.899314	5.67987	342.586	0.67582
mat_12	wsnp_JD_rep_c64325_41024646	3A	466111273	2	4.20812	0.0186351	-0.450805	1.17527	0.281888	-2.61367	8.02367	0.00596425	74	0.123584	1.57466	4.7927	346.426	0.67582
mat_12	Ex_c5979_1449	4A	467297790	2	4.20772	0.0186418	-1.26977	7.09161	0.00952247	2.25676	3.53835	0.063953	74	0.096968	0.985908	5.4741	348.052	0.67582
mat_12	BS00011869_51	3D	426452281	2	4.20521	0.0186838	-1.45085	7.35152	0.00834901	-1.73997	2.27413	0.135865	74	0.0845469	0.2801	6.49754	348.625	0.67582
mat_12	IAAV7468	2A	46108242	2	4.20661	0.0187146	-1.25329	8.16839	0.00557036	0.164677	0.0212468	0.884516	73	0.0958434	0.541005	6.16484	343.087	0.67582
mat_12	D_GA8KES401EYUM8_190	1D	412081175	2	4.19393	0.0189284	-0.820628	5.07582	0.0273094	-1.41358	1.68903	0.197875	73	0.0831081	0.0840265	6.90532	354.477	0.677004
mat_12	RAC875_c64593_117	6A	26633472	2	4.18821	0.0189709	-0.0382887	0.00317944	0.955188	-2.36303	8.37259	0.00501877	74	59.4789	10.021	0.00010021	578.765	0.677004
mat_12	BS00093889_51	3A	724319940	2	4.18863	0.0190184	-1.13409	5.60788	0.0205676	-2.9044	4.93945	0.0293919	73	0.0943199	1.27923	5.19357	342.42	0.677004
mat_12	Tdurum_contig10677_529	7B	657933269	2	4.18755	0.0190369	0.425323	0.894123	0.347525	-2.11808	5.64108	0.0202101	73	0.100412	1.20552	5.27311	343.271	0.677004
mat_12	BobWhite_c26082_239	5B	685431595	2	4.17521	0.0191934	0.288125	0.596537	0.442396	-2.24077	6.93435	0.0103154	74	0.0967774	1.53674	4.8313	352.768	0.679984
mat_12	RFL_Contig2160_617	1B	46884361	2	4.15861	0.0194815	0.887619	4.37025	0.0400539	-2.40282	5.3647	0.023359	74	0.104631	1.22169	5.19955	342.907	0.685806
mat_12	JD_c39990_130	2B	133169393	2	4.15573	0.0195875	0.672126	2.33637	0.130766	-2.76014	7.69876	0.00703447	73	0.102568	0.981727	5.29508	340.036	0.685806
mat_12	wsnp_BE605194B_Ta_2_1	7B	657872619	2	4.1499	0.0196345	0.387259	0.71482	0.400611	-2.16906	5.967	0.0169963	74	0.116393	1.6067	4.81207	341.582	0.685806
mat_12	Ku_c23446_2209	2B	133009054	2	4.15205	0.0197095	-0.692871	2.56336	0.113806	-2.9495	7.47748	0.00788289	72	0.0937336	0.743985	5.66295	339.371	0.685806
mat_12	BS00026456_51	1A	3118274	2	4.15121	0.0197244	-0.0905555	0.0540258	0.816869	2.85649	7.09005	0.00958236	72	0.128088	2.12722	3.59261	333.05	0.685806
mat_12	D_contig25212_98	2A	84940007	2	4.13282	0.0199941	-0.890883	2.38461	0.12692	-3.30581	7.79347	0.00670975	73	0.120089	1.61067	4.80986	341.066	0.69261
mat_12	RAC875_c50787_146	3D	363270236	1	5.63181	0.0202354	NaN	NaN	NaN	NaN	NaN	NaN	75	0.0590537	7.17151e-05	7.17151	356.083	0.697048
mat_12	BS00066647_51	7B	676144771	2	4.10605	0.0204233	-0.612816	0.399411	0.529368	-6.35247	7.79137	0.00669554	74	0.101892	1.17435	5.25662	348.347	0.697048
mat_12	IAAV3100	2B	715028510	2	4.12121	0.0204463	0.962734	7.98567	0.00618457	-0.610327	0.248485	0.619753	69	0.0885523	0.206366	6.34599	327.867	0.697048
mat_12	wsnp_BE605194B_Ta_2_7	7B	657871634	2	4.11105	0.0204468	-0.4292	0.90069	0.345816	-2.21784	5.62154	0.0204583	72	0.0946447	1.2007	5.36522	340.321	0.697048
mat_12	TA004059-0492	1B	658714967	2	4.11508	0.0204948	1.22921	8.1326	0.00573111	-0.191291	0.0343301	0.85355	70	0.105516	0.501729	6.24599	330.507	0.697048
mat_12	Kukri_c39994_227	7A	68882767	2	4.07351	0.0210875	-0.335881	0.336152	0.563869	-3.42763	8.00113	0.0060514	73	0.126764	1.73233	4.74086	344.9	0.714605
mat_12	wsnp_Ku_c1292_2572053	2A	45120172	2	4.06443	0.0212603	-1.24884	8.02289	0.00598643	0.372616	0.108056	0.743322	73	0.08984	0.718458	5.88255	343.193	0.717861
mat_12	BS00062644_51	7A	641320627	2	4.05237	0.0214337	-0.851459	5.32789	0.0238221	2.17946	3.74601	0.0568072	74	0.0910948	1.20463	5.23078	343.026	0.71861
mat_12	BobWhite_c11539_336	3D	90826808	2	4.05701	0.0214621	-1.34266	6.88736	0.0106208	-2.4069	3.56967	0.0629275	72	0.0904358	0.684081	6.04658	338.322	0.71861
mat_12	Excalibur_c28045_741	1B	619259218	2	4.05128	0.021513	0.589799	2.2517	0.137841	2.62375	6.57983	0.0123979	73	0.0995472	1.25582	5.07223	342.891	0.71861
mat_12	RFL_Contig5001_1099	1A	353916288	1	5.51906	0.0217667	NaN	NaN	NaN	NaN	NaN	NaN	68	0.0772644	1.0508	5.62828	321.896	0.723214
mat_12	RAC875_c23168_480	1A	537964999	2	4.03616	0.0218677	1.09018	6.6201	0.0121742	-0.35212	0.145047	0.704451	72	0.0849923	0.122486	6.51534	337.535	0.723214
mat_12	BS00078785_51	7B	654951710	2	4.03249	0.022002	0.379224	0.78035	0.380058	-2.28687	6.13823	0.0156455	71	0.0953074	1.32661	5.26217	335.997	0.723214
mat_12	BS00022949_51	2B	140850002	2	4.01908	0.022086	-0.796321	2.57251	0.113053	-3.63581	7.45224	0.00793596	74	0.0891053	0.763585	5.88067	348.889	0.723214
mat_12	wsnp_Ex_c3964_7181151	2A	765710044	2	4.01535	0.0222803	0.0809495	0.0358216	0.850424	-1.99994	7.97567	0.00614908	72	0.468546	3.11595	3.06635	342.351	0.723214
mat_12	Kukri_c7192_1128	1A	3382874	2	4.00637	0.0223402	-0.136774	0.0361308	0.849773	3.45392	6.14825	0.0154624	74	0.127858	1.26381	5.19149	348.443	0.723214
mat_12	IACX2941	1B	53052313	2	4.00637	0.0223402	-0.136774	0.0361308	0.849773	3.45392	6.14825	0.0154624	74	0.127858	1.26381	5.19149	348.443	0.723214
mat_12	Excalibur_c833_1405	6D	351750309	1	5.45492	0.0223431	NaN	NaN	NaN	NaN	NaN	NaN	72	0.0767249	0.942999	5.89589	343.071	0.723214
mat_12	BS00062781_51	6A	580199459	2	4.00605	0.0223467	0.77365	3.73113	0.0572891	2.02389	4.52407	0.0368008	74	0.13138	1.58666	4.83107	346.149	0.723214
mat_12	Tdurum_contig49187_601	5A	482375729	2	4.00626	0.0225906	-0.682952	3.57244	0.0629466	3.70765	5.67454	0.0199742	70	0.114485	1.13405	5.12597	329.338	0.725796
mat_12	RAC875_rep_c105322_99	5B	403782839	2	4.009	0.0226018	-0.958621	5.65962	0.0201732	-1.66134	2.78046	0.10002	69	0.140612	1.12107	5.09642	322.492	0.725796
mat_12	wsnp_Ra_c22775_32274079	4A	710663173	2	3.99064	0.0226593	0.749308	1.1621	0.284581	2.67231	3.76069	0.056336	74	0.128267	1.2535	5.19583	349.445	0.725796
mat_12	IAAV3806	6A	52019701	2	3.97299	0.0230228	-2.78714	7.68018	0.00707818	1.91353	1.31371	0.255468	74	0.0893088	1.03877	5.46066	348.527	0.730145
mat_12	BS00071736_51	7A	733367334	2	3.96747	0.0231376	-1.02608	4.97436	0.0287999	2.64015	4.95332	0.029129	74	0.104956	1.41224	4.99885	348.252	0.730145
mat_12	GENE-0315_356	1B	561506291	2	3.96302	0.0232307	-0.791749	4.15384	0.0451638	-1.4954	2.23859	0.138915	74	0.0901315	0.713043	5.92141	348.473	0.730145
mat_12	IAAV7916	7A	80851910	2	3.95436	0.0234128	-0.0364125	0.0058388	0.9393	-3.3329	7.23801	0.00884168	74	0.0892311	1.48839	4.91609	350.849	0.730145
mat_12	Kukri_c11397_2523	6B	717865324	2	3.95722	0.0234132	-0.593346	2.5135	0.117258	-2.46972	5.42823	0.0226214	73	0.0952797	0.768709	5.88309	347.895	0.730145
mat_12	IAAV5841	1B	561643016	2	3.95973	0.0234227	0.714764	3.46777	0.0667138	-2.54143	3.20848	0.0775193	72	0.0866442	0.771937	5.95256	342.756	0.730145
mat_12	IAAV3545	4A	726121649	2	3.95213	0.0235832	0.76026	2.44512	0.122337	-2.86631	6.89559	0.0105765	72	0.109531	2.19271	4.30238	340.002	0.730145
mat_12	RAC875_c1265_1564	7A	635499353	2	3.94543	0.0236632	1.04654	2.98353	0.0884034	-3.96874	6.35971	0.0138868	73	0.0925188	1.10969	5.44103	344.491	0.730145
mat_12	Kukri_c61419_550	4A	488252088	2	3.9452	0.0236682	1.18053	5.8085	0.0185052	2.35681	3.87645	0.0528175	73	0.0959046	1.05684	5.41952	345.053	0.730145
mat_12	RAC875_rep_c112449_669	6D	465209359	2	3.93759	0.02377	1.84525	7.03972	0.00977681	-4.41266	2.35427	0.129264	74	0.0801118	0.194919	6.69106	347.112	0.730145
mat_12	CAP11_c3464_68	1A	511502142	2	3.94249	0.0237888	-0.801203	4.24664	0.0429927	-1.70972	2.44994	0.121976	72	0.0886301	0.676139	5.9579	339.902	0.730145
mat_12	GENE-4375_382	7A	79780963	2	3.93277	0.0238735	-0.533292	0.888202	0.349074	-3.61711	7.84854	0.00650729	74	0.103711	1.52546	4.94439	348.902	0.730145
mat_12	RFL_Contig2772_1693	5B	605480892	1	5.31788	0.0239497	NaN	NaN	NaN	NaN	NaN	NaN	74	0.0619159	0.465805	6.47002	350.248	0.730145
mat_12	RAC875_c41169_68	7A	10194037	2	3.93158	0.0239606	1.08794	7.48681	0.00782228	0.917781	0.797848	0.374714	73	0.0909459	0.645516	6.04778	346.825	0.730145
mat_12	Kukri_c67054_123	5B	684612598	2	3.92849	0.023966	0.55824	1.14618	0.287877	3.23414	7.82904	0.00657085	74	0.0934448	1.34184	5.08246	349.879	0.730145
mat_12	Excalibur_c8720_297	2D	610276918	2	3.92955	0.0241995	-0.412981	0.349335	0.556421	5.20779	7.83513	0.00663864	70	0.369864	2.24615	3.85256	334.836	0.998153
mat_12	IAAV125	4A	541340585	2	3.92559	0.0242186	-1.00924	7.0597	0.00975838	-1.46642	1.85579	0.177479	71	0.0974605	1.01616	5.63436	333.6	0.73128
mat_12	Excalibur_c10263_218	6A	52019833	2	3.92172	0.0242379	-2.42969	6.36486	0.013882	0.608185	0.104587	0.747344	72	0.0900479	0.930803	4.91611	331.531	0.73128
mat_12	BobWhite_c11038_605	5B	654751460	2	3.90614	0.0245165	-0.87845	6.04182	0.0163784	-1.63849	1.92739	0.169325	73	0.0803822	0.353864	6.4812	341.96	0.734787
mat_12	BS00003655_51	5B	606020996	2	3.89734	0.0246497	1.64108	7.76406	0.00678749	1.24473	0.194975	0.660113	74	0.0776726	0.134722	6.80353	349.194	0.734787
mat_12	Tdurum_contig92835_177	1B	687720350	2	3.89429	0.0247179	-1.23629	7.73021	0.00690328	-0.218343	0.0558264	0.81388	74	0.0822548	0.536157	6.14281	348.901	0.734787
mat_12	BS00022417_51	2B	142446162	2	3.88863	0.0248445	0.764538	2.37324	0.127755	-3.27554	7.31349	0.00851077	74	0.10003	0.79631	5.77455	349.323	0.734787
mat_12	Kukri_rep_c68371_1242	2B	616969888	2	3.88717	0.0248775	-0.557598	1.1867	0.279579	2.76455	5.07177	0.0273265	74	0.0898186	1.07696	5.41195	354.762	0.734787
mat_12	Kukri_c27309_590	2D	31806210	2	3.88626	0.0248978	-0.238326	0.1584	0.691795	6.90867	6.85099	0.0107635	74	0.0955363	1.70537	4.68964	349.832	0.734787
mat_12	Excalibur_c23748_452	6A	23356506	2	3.88151	0.025005	-1.16729	2.48945	0.118935	5.20642	7.00167	0.0099678	74	0.0966097	1.4156	5.00743	348.789	0.734787
mat_12	IACX5772	6A	23602570	2	3.88151	0.025005	-1.16729	2.48945	0.118935	5.20642	7.00167	0.0099678	74	0.0966097	1.4156	5.00743	348.789	0.734787
mat_12	wsnp_Ra_c12935_20587578	3B	469766713	2	3.88065	0.0250871	-1.29571	5.37005	0.0233322	-2.31812	4.00746	0.0490676	73	0.0882779	0.476857	6.28843	341.102	0.734787
mat_12	wsnp_Ra_c3270_6136601	1A	500980808	2	3.87221	0.025216	0.977544	7.64713	0.00719628	-0.673687	0.413474	0.522226	74	0.0809685	0.423158	6.32673	349.424	0.734787
mat_12	BobWhite_c12457_433	3A	479772480	2	3.87525	0.0252742	1.33674	5.35296	0.0235865	-2.30421	3.88634	0.0525782	72	0.0845054	0.350456	6.54104	342.328	0.734787
mat_12	Ra_c956_2318	7A	733362372	2	3.86372	0.0254105	-1.06565	5.30917	0.0240613	2.47229	4.66214	0.034121	74	0.0929608	1.55894	4.85338	348.676	0.734787
mat_12	Kukri_c48199_102	4A	543741072	2	3.8684	0.0254976	1.24343	7.39685	0.00823365	0.394416	0.0842125	0.772526	71	0.0971982	1.12296	4.95486	328.407	0.734787
mat_12	wsnp_BE495143A_Ta_2_2	6A	580198764	2	3.87194	0.0255557	0.821717	4.22501	0.0436753	2.29203	4.10974	0.0465591	69	0.128275	1.87045	4.18063	321.519	0.734787
mat_12	RAC875_c39237_193	7A	76491584	2	3.85451	0.025623	0.307854	0.353682	0.553875	-3.04966	7.68656	0.00705565	74	0.155087	2.03864	4.35824	350.549	0.734787
mat_12	Kukri_c39882_203	4A	538486956	2	3.86881	0.0256275	-0.855664	5.95772	0.0172624	-1.97017	2.48425	0.119633	69	0.0889424	0.926179	5.51775	322.471	0.734787
mat_12	RAC875_c14944_555	2A	36932761	1	5.18385	0.0256897	NaN	NaN	NaN	NaN	NaN	NaN	75	0.0574001	1.05913	5.56468	353.492	0.734787
mat_12	Tdurum_contig11216_942	1B	645571983	2	3.83658	0.0261058	-0.346581	0.680338	0.412195	-2.73227	7.07566	0.00962582	73	0.0933921	0.514481	6.27094	344.564	0.741551
mat_12	RFL_Contig1823_1044	1B	645708109	2	3.83658	0.0261058	-0.346581	0.680338	0.412195	-2.73227	7.07566	0.00962582	73	0.0933921	0.514481	6.27094	344.564	0.741551
mat_12	BS00022660_51	6A	23410152	2	3.83411	0.026164	-1.18266	2.52931	0.116131	5.20402	6.88131	0.0106255	73	0.0943831	1.36534	5.15878	345.613	0.741551
mat_12	Kukri_c10508_253	5B	617137883	1	5.14352	0.0263344	NaN	NaN	NaN	NaN	NaN	NaN	73	0.0518777	0.0716344	7.02573	346.498	0.742101
mat_12	Tdurum_contig28828_664	7B	329848893	2	3.82392	0.0263421	1.06404	5.25919	0.0247125	2.46823	4.60865	0.0351336	74	0.103138	1.5571	4.90762	348.794	0.742101
mat_12	CAP7_c3756_190	7A	501588085	2	3.81911	0.0264571	1.69661	6.68075	0.0117435	-2.62823	3.87612	0.0527744	74	0.0832045	1.3082	5.17883	344.886	0.743102
mat_12	wsnp_Ex_c2474_4619730	5A	457521276	2	3.80994	0.0267422	-0.863914	4.85078	0.0308362	-1.08139	1.23044	0.271012	73	0.0952808	0.995689	5.57167	343.255	0.74886
mat_12	RAC875_c35846_671	2D	333205836	1	5.10174	0.026975	NaN	NaN	NaN	NaN	NaN	NaN	72	0.0566495	0.472929	6.56394	343.145	0.753125
mat_12	BobWhite_c15766_562	2A	740012559	2	3.79878	0.02708	0.289313	0.568685	0.453276	-2.75317	6.34047	0.014058	72	0.0949497	1.12531	5.48396	340.846	0.753602
mat_12	wsnp_BE497820B_Ta_2_1	5B	411930792	1	5.08359	0.0271532	NaN	NaN	NaN	NaN	NaN	NaN	74	0.065151	0.812106	5.98675	352.222	0.753602
mat_12	Tdurum_contig98206_211	2B	136430718	2	3.78962	0.0272382	0.723542	2.04791	0.156742	-3.1192	7.2476	0.0088236	73	0.0878228	0.942328	5.68268	344.105	0.753724
mat_12	GENE-0069_468	1A	537974212	2	3.79246	0.0274478	1.09318	6.79491	0.0112247	-0.245805	0.0567868	0.812365	69	0.0820718	0.200885	6.60894	326.755	0.756363
mat_12	BS00022067_51	5D	351397565	2	3.77615	0.0275068	1.16381	6.5928	0.012286	-2.4506	2.1001	0.151572	74	0.0909305	0.740741	5.86958	348.14	0.756363
mat_12	RAC875_c18668_513	7B	749423123	2	3.78685	0.0275866	1.201	7.50168	0.00786335	0.873675	0.434647	0.511944	69	0.166472	2.3447	3.12555	317.827	0.756363
mat_12	RAC875_c232_1895	5A	478896690	2	3.76987	0.0276638	-0.913502	2.39014	0.126427	1.99529	2.86438	0.0948248	74	0.0917631	1.21009	5.26781	344.682	0.756363
mat_12	wsnp_Ex_c50413_54706626	5B	476798411	2	3.76457	0.0279304	0.928455	4.48337	0.03773	1.96496	3.90544	0.052016	72	0.0897673	1.70456	4.81653	347.352	0.756363
mat_12	wsnp_Ku_c93664_84327484	3B	552230969	2	3.76398	0.0279452	1.31648	6.27473	0.0145439	-1.59816	1.69917	0.196607	72	0.0794211	0.237522	6.69254	341.601	0.978167
mat_12	wsnp_Ku_c15214_23756800	1A	503312313	2	3.76159	0.0280057	-0.893751	6.49989	0.0129492	-1.44686	1.50969	0.223243	72	0.0852495	0.433268	6.44666	340.56	0.756363
mat_12	Tdurum_contig8171_1680	5B	658454412	2	3.75682	0.0281966	1.32977	7.43695	0.00806972	0.935963	0.571425	0.45223	71	0.0761027	7.30628e-05	7.30628	337.634	0.756363
mat_12	BS00011513_51	6B	7101243	2	3.75121	0.0282017	0.00176856	1.83819e-05	0.996591	7.13248	7.4775	0.00785894	73	0.126197	1.76331	4.74165	343.595	0.756363
mat_12	wsnp_Ex_c21129_30256617	6A	608074487	2	3.75116	0.0282031	1.03536	7.18763	0.00909513	-0.455424	0.28579	0.594578	73	0.0870727	1.30269	5.20457	344.245	0.756363
mat_12	RAC875_c1757_530	2A	770011371	1	5.0091	0.0282231	NaN	NaN	NaN	NaN	NaN	NaN	75	0.0761078	0.826578	5.88231	354.269	0.756363
mat_12	BS00095061_51	3B	455065619	2	3.74144	0.0283861	-0.783781	2.71496	0.103709	-2.94489	6.38621	0.0136669	74	0.0905575	0.958259	5.59034	348.98	0.757243
mat_12	Excalibur_c31042_178	2B	17390614	2	3.74021	0.0284179	0.249386	0.119824	0.730221	-3.3112	6.71176	0.0115582	74	0.0874508	1.62552	4.80371	354.573	0.757243
mat_12	Kukri_c64223_135	6A	615447312	2	3.73659	0.0285777	-0.670161	3.57774	0.0625813	-2.0673	3.73161	0.0573278	73	0.0832609	0.901103	5.44418	340.582	0.759339
mat_12	RAC875_c32212_84	7A	501069485	2	3.72622	0.0288475	1.68221	6.64777	0.011973	-2.77128	3.4955	0.0656018	73	0.0850718	1.00239	5.60566	343.616	0.759849
mat_12	BS00099367_51	5B	605785862	1	4.96819	0.0288538	NaN	NaN	NaN	NaN	NaN	NaN	75	0.0524349	0.466294	6.41174	354.566	0.759849
mat_12	RAC875_rep_c72435_90	2D	84342533	2	3.72666	0.0289048	0.674675	1.8686	0.175949	-3.3749	7.1011	0.00952891	72	0.0842261	0.881349	5.85057	340.626	0.759849
mat_12	wsnp_Ra_c17636_26538543	2A	759537063	2	3.72083	0.0289219	0.323472	0.436367	0.51096	-2.97368	7.36402	0.00829654	74	0.0825762	1.01953	5.51175	347.071	0.759849
mat_12	wsnp_Ex_c44049_50205904	1D	262248010	2	3.7109	0.0291837	0.940461	4.01222	0.0488849	1.15854	1.1396	0.289254	74	0.0778902	0.31704	6.52073	345.724	0.760056
mat_12	IAAV6833	7B	6372478	2	3.70748	0.0292745	-0.323948	0.308719	0.580166	-3.05743	7.25521	0.0087651	74	0.154129	1.90482	4.50989	349.705	0.760056
mat_12	GENE-2673_1010	5A	706538644	2	3.70569	0.0293222	1.33161	6.99827	0.00998505	-1.72951	2.37359	0.127727	74	0.0801038	0.494427	6.24798	350.432	0.760056
mat_12	Excalibur_rep_c110824_66	5D	58252215	2	3.70356	0.0293788	-1.30429	5.75704	0.0189761	-0.619876	0.224983	0.636685	74	0.0795477	0.300448	6.55501	349.454	0.760056
mat_12	BS00109717_51	6B	686801922	2	3.70356	0.0293788	-1.30429	5.75704	0.0189761	-0.619876	0.224983	0.636685	74	0.0795477	0.300448	6.55501	349.454	0.760056
mat_12	Kukri_c15768_1383	7D	550216751	2	3.69937	0.0294909	-0.643935	2.7906	0.0991015	3.23826	5.6003	0.0206124	74	0.0872973	1.06639	5.45221	348.829	0.760056
mat_12	Excalibur_c28759_914	6B	716259047	2	3.7048	0.0295538	-0.99251	6.42967	0.0134583	-1.54449	1.51245	0.222883	71	0.0830736	0.708497	5.84689	333.233	0.760056
mat_12	GENE-3798_1143	6B	126137386	2	3.69455	0.0297575	-0.553574	0.320479	0.573105	7.33039	7.38856	0.00824278	72	0.0919297	1.55268	5.00925	340.669	0.760056
mat_12	Kukri_c14191_351	6B	148828639	2	3.69019	0.0298053	-1.26433	2.85308	0.0955258	5.09359	6.37706	0.0137629	73	0.0911944	1.34253	5.19488	340.511	0.760056
mat_12	BS00066437_51	6B	149458413	2	3.68402	0.0299049	-1.25613	2.8519	0.0955334	5.0698	6.36456	0.0138208	74	0.0967203	1.30084	5.18039	349.08	0.760056
mat_12	Tdurum_contig15238_972	6B	149471810	2	3.68402	0.0299049	-1.25613	2.8519	0.0955334	5.0698	6.36456	0.0138208	74	0.0967203	1.30084	5.18039	349.08	0.760056
mat_12	GENE-4045_141	UN	78168717	2	3.68402	0.0299049	-1.25613	2.8519	0.0955334	5.0698	6.36456	0.0138208	74	0.0967203	1.30084	5.18039	349.08	0.760056
mat_12	Tdurum_contig51922_676	3A	749278248	2	3.67279	0.0302796	-1.37647	6.88443	0.0106086	0.179294	0.0325613	0.857308	73	0.084055	0.790332	5.89579	330.875	0.764246
mat_12	wsnp_Ex_c24443_33687802	4A	544891081	2	3.67246	0.0302886	-1.4474	7.16102	0.00921839	1.65987	1.95542	0.166297	73	0.122272	1.1233	5.49164	344.153	0.764246
mat_12	Kukri_c855_908	7A	708140525	2	3.6711	0.0303262	0.187393	0.0869879	0.768891	7.23781	7.2247	0.00892628	73	0.102052	1.63593	4.88655	341.316	0.764246
mat_12	wsnp_Ex_c11070_17950604	5D	561704414	2	3.66815	0.0304777	-0.939798	7.3038	0.0086019	0.603328	0.232242	0.631348	72	0.0749856	0.0705424	7.0532	345.42	0.764246
mat_12	Tdurum_contig33428_272	6B	40431104	2	3.66558	0.0304783	0.1721	0.109524	0.741648	7.05875	7.16135	0.00921685	73	0.0933711	1.63814	4.9667	344.323	0.764246
mat_12	BS00011060_51	4A	37048988	2	3.65284	0.0307643	-0.657551	2.38467	0.126855	2.57534	3.1906	0.0782154	74	0.0805749	0.919963	5.64598	349.268	0.767935
mat_12	Ku_c32426_324	7D	548804403	2	3.66469	0.0308766	1.08342	7.32934	0.00859927	0.690736	0.320244	0.573351	68	0.166285	2.16287	3.98611	310.032	0.767935
mat_12	BS00022523_51	7B	701188172	2	3.64679	0.0309339	-0.642583	1.49001	0.226143	-3.5155	7.15731	0.00921038	74	0.0798968	0.645911	6.03422	350.46	0.936196
mat_12	Excalibur_c5700_244	7B	608907415	2	3.64563	0.0309664	-1.12472	6.50519	0.0128528	1.95197	2.43215	0.123195	74	0.0929738	0.799581	5.82262	349.65	0.767935
mat_12	Excalibur_c47535_389	2A	603548405	2	3.64225	0.0310617	-0.255667	0.389086	0.534725	2.71142	6.14267	0.0155074	74	0.0932883	1.44239	5.01642	353.214	0.767935
mat_12	Kukri_c57674_324	7A	81133872	2	3.6427	0.0311181	0.17252	0.1211	0.72886	-4.00551	7.24431	0.00883829	73	0.101841	1.53855	4.81866	338.696	0.767935
mat_12	Excalibur_c23239_961	2D	602513121	2	3.63783	0.0312561	0.478718	0.671354	0.415284	2.93307	7.26253	0.00875732	73	0.103663	1.53768	4.97666	332.846	0.769312
mat_12	Kukri_rep_c108929_91	3B	556873348	2	3.63679	0.0313568	1.3994	6.25572	0.0146877	-1.66449	2.24711	0.138297	72	0.0871768	0.40285	6.53638	341.672	0.769765
mat_12	wsnp_Ex_c21930_31102213	3B	672100052	2	3.62815	0.0316035	-1.32582	7.18503	0.00913298	-0.887442	0.798933	0.374433	72	0.0798678	0.327048	6.62895	345.831	0.77379
mat_12	BS00021680_51	1B	619691916	2	3.61853	0.0318806	0.49606	1.55194	0.216945	2.65734	6.25048	0.0147277	72	0.0922239	1.24474	5.38925	340.989	0.77833
mat_12	TA002907-0816	6B	719734212	2	3.61348	0.0319554	0.482131	1.61761	0.207518	-2.30133	5.89221	0.0177104	73	0.0996318	1.04844	5.54857	344.396	0.77833
mat_12	BS00080047_51	6D	465743584	2	3.6143	0.0321533	-2.19787	4.38996	0.0398233	-6.69414	5.23202	0.0252456	70	0.0874086	0.704742	6.17431	327.38	0.778476
mat_12	wsnp_Ku_c21752_31528824	3D	606299969	2	3.60397	0.0321625	0.744156	1.66181	0.201429	2.39885	3.51257	0.0649065	74	0.0913603	1.51135	4.94604	349.866	0.778476
mat_12	BS00108784_51	7A	66227903	2	3.60231	0.0322111	-0.338005	0.301504	0.584617	-3.03624	7.01914	0.00987962	74	0.110727	1.7992	4.63734	350.414	0.778476
mat_12	D_contig14507_369	1D	365845918	2	3.60262	0.0323443	-1.70087	7.17977	0.00915727	1.3457	0.602504	0.440202	72	0.0727306	0.0494965	7.10222	342.287	0.77968
mat_12	BobWhite_c22370_352	3B	417265437	2	3.60733	0.0325998	-0.67622	2.9025	0.0931466	-2.01459	5.23933	0.0252895	67	0.106245	1.42417	4.67987	309.539	0.783187
mat_12	wsnp_BE637971D_Ta_2_3	1A	9643308	2	3.58951	0.0327316	0.480306	1.14669	0.287869	1.95459	5.31019	0.02413	72	0.100603	1.55785	5.07184	344.946	0.783187
mat_12	Tdurum_contig46389_1540	3B	29356065	2	3.5856	0.0329228	0.242297	0.293268	0.589854	6.87815	6.78545	0.0112167	71	0.0954493	1.52947	5.00588	338.683	0.783187
mat_12	RAC875_rep_c112008_519	2B	139812734	2	3.59076	0.0329249	-0.615357	1.90438	0.17211	-3.17416	6.48614	0.0131403	69	0.0842203	1.23455	5.31229	324.678	0.783187
mat_12	Kukri_c16416_647	7A	563504576	2	3.57707	0.0329599	0.798705	3.72345	0.0575397	-1.60942	3.61692	0.0611407	74	0.113182	1.34392	5.17941	352.503	0.783187
mat_12	RAC875_rep_c111888_724	7A	76500720	2	3.57299	0.0330827	0.384077	0.503239	0.48034	-2.95247	7.12034	0.00938464	74	0.101521	1.91569	4.52409	352.683	0.783187
mat_12	RAC875_c48885_107	4B	667614239	2	3.58204	0.0331064	-1.35871	7.16278	0.00929065	-1.2129	0.196222	0.659174	70	0.0781563	0.487144	6.45226	330.064	0.783187
mat_12	TA015761-0703	6D	282612421	2	3.59135	0.0331596	0.350993	0.323521	0.57146	-2.60529	6.54943	0.0128282	66	0.0801144	0.452432	6.16686	308.639	0.783187
mat_12	Ra_c8937_191	7A	81498302	2	3.56376	0.0335063	0.173977	0.12115	0.728821	-4.01477	7.08972	0.00958397	72	0.16597	1.54008	4.93927	340.226	0.78849
mat_12	wsnp_Ex_c33452_41938159	1A	540051856	2	3.56224	0.0335527	-1.09314	6.65413	0.0119638	0.18996	0.0368209	0.848378	72	0.0711738	0.059587	7.10198	342.338	0.78849
mat_12	BS00023080_51	6B	686798981	2	3.55225	0.0337852	-1.32536	5.67228	0.0198802	-0.566465	0.188847	0.665178	73	0.0775798	0.501413	6.33824	338.949	0.789405
mat_12	Excalibur_c48317_242	1D	416099580	2	3.55376	0.0338879	0.667119	3.28455	0.0742233	-2.57208	2.97729	0.0888528	71	0.0798469	0.357432	6.72979	338.613	0.789405
mat_12	BS00065245_51	2A	758389647	2	3.57511	0.0339266	1.06531	5.93393	0.0177393	-1.54448	1.11139	0.295872	63	0.0820677	0.151405	6.89232	296.679	0.789405
mat_12	IACX1444	2D	75389775	2	3.54426	0.0339601	1.02731	6.1112	0.0157636	0.344362	0.0991648	0.753733	74	0.0778324	0.392943	6.42757	348.327	0.789405
mat_12	Excalibur_rep_c102300_102	3D	153502655	2	3.54485	0.0340137	-0.958083	7.08189	0.00959545	-0.482521	0.265968	0.607629	73	0.157197	1.77862	4.10214	346.584	0.789405
mat_12	wsnp_Ku_c43368_50890819	6B	679243223	2	3.53875	0.0341311	-0.912721	6.51712	0.012774	-1.09999	1.14419	0.288294	74	0.0750465	0.545475	6.18896	353.479	0.790168
mat_12	BS00066231_51	5B	639973091	2	3.5367	0.0342668	-0.881084	3.5708	0.0628303	-2.68153	2.824	0.0971989	73	0.0822808	0.623803	6.14132	339.867	0.790372
mat_12	Kukri_c63505_174	2D	75097116	2	3.53386	0.0343558	1.03339	6.06823	0.0161544	0.474482	0.166702	0.684271	73	0.0802622	0.41508	6.48573	346.019	0.790372
mat_12	IAAV1382	3B	556867060	2	3.52598	0.0346032	-1.35903	6.45963	0.0131888	-1.66342	1.9407	0.167879	73	0.0820439	0.433581	6.25412	342.332	0.790372
mat_12	BS00104270_51	1B	688232218	2	3.53012	0.034702	-1.43537	4.88513	0.0304082	0.78003	0.562716	0.455718	70	0.0996208	1.10864	5.73427	334.426	0.790372
mat_12	Excalibur_c17456_428	2D	75257714	2	3.51942	0.034738	-1.02633	6.0672	0.0161294	0.343813	0.0986473	0.754355	74	0.0768963	0.40875	6.41918	351.156	0.790372
mat_12	BS00049639_51	3B	419566477	2	3.51688	0.0348186	-0.0893262	0.0547934	0.815578	-2.25358	7.03351	0.00980769	74	0.0818173	1.37565	5.1144	343.427	0.790372
mat_12	BobWhite_c40602_313	6A	608077839	2	3.52047	0.0348515	-1.01385	6.98692	0.0100967	-0.170805	0.0329793	0.856413	72	0.100729	1.25738	5.14203	338.229	0.790372
mat_12	D_GB5Y7FA02IDDA9_183	7D	13487465	2	3.52304	0.0350065	0.912098	6.54489	0.0127509	-0.774905	0.460183	0.49984	69	0.0832844	0.672807	6.15025	330.938	0.790372
mat_12	BS00022127_51	7B	3541540	2	3.51629	0.0350612	-0.448516	1.49603	0.225385	-2.15716	5.86062	0.0180799	71	0.306139	2.70735	3.46691	331.304	0.790372
mat_12	RFL_Contig5917_3026	2D	83167370	2	3.51281	0.0350954	-0.884628	2.21198	0.141371	-3.09334	6.48346	0.0130591	72	0.104211	1.93323	4.66621	330.636	0.87028
mat_12	wsnp_Ex_c65899_64135487	7D	13603255	2	3.50818	0.0353996	0.904823	6.63882	0.0121206	-0.708135	0.366889	0.546692	70	0.0983364	0.531495	6.29581	331.238	0.790372
mat_12	Kukri_c12534_559	1A	29191173	2	3.50152	0.0354577	0.20498	0.240825	0.625124	2.57239	6.88263	0.0106464	72	0.0968799	1.40715	5.17727	341.323	0.790372
mat_12	IAAV2725	4B	645298527	2	3.49961	0.0355195	-0.237392	0.295435	0.588461	3.18519	6.98139	0.0101251	72	0.0809641	1.34107	5.31082	344.551	0.790372
mat_12	RAC875_c47003_445	5D	185201679	2	3.4963	0.0357038	0.712983	2.63271	0.109178	2.2872	4.5555	0.036317	71	0.0784547	0.734156	6.11204	334.692	0.790372
mat_12	wsnp_Ex_c39304_46634878	6B	153957222	1	4.57663	0.0357094	NaN	NaN	NaN	NaN	NaN	NaN	75	0.0913527	0.960119	5.74442	354.838	0.790372
mat_12	Kukri_c52496_434	7B	609908981	2	3.48598	0.0358143	1.13116	6.53896	0.0126312	1.73742	1.58059	0.212683	74	0.0761663	0.853129	5.77296	349.159	0.790372
mat_12	wsnp_Ex_c33452_41938013	1A	540051721	2	3.49009	0.0358285	1.11009	6.9487	0.0102947	0.672375	0.372935	0.543359	72	0.0728096	7.2079e-05	7.2079	344.287	0.790372
mat_12	wsnp_CAP8_rep_c4776_2319078	6B	715751256	2	3.48756	0.0359887	0.514271	1.38482	0.243268	-3.26701	5.68681	0.0198056	71	0.10095	1.42714	5.23173	334.374	0.790372
mat_12	BS00059315_51	2B	138536851	2	3.47945	0.0360283	0.657607	1.78666	0.185485	-2.87588	6.6821	0.0117354	74	0.0947032	0.914655	5.72478	349.652	0.790372
mat_12	RAC875_c3925_1043	5A	493464669	2	3.4814	0.0361132	-0.910352	4.96574	0.0290222	3.33512	3.03837	0.0856466	72	0.0769096	0.907258	5.81492	344.851	0.790372
mat_12	Excalibur_c224_1383	2B	763862435	2	3.47844	0.0362107	-0.901249	2.55689	0.114255	3.04425	6.42168	0.0134812	72	0.0909628	1.64783	4.94988	341.878	0.790372
mat_12	IACX5994	1A	540051730	2	3.47751	0.0362415	-1.10041	6.69018	0.0117451	0.325715	0.0995464	0.7533	72	0.0710998	0.0709618	7.1345	342.648	0.790372
mat_12	Excalibur_c97157_65	1A	539702694	2	3.47762	0.0363156	1.09285	6.90035	0.0105796	0.476074	0.305772	0.582048	71	0.0788602	0.220742	6.68761	334.372	0.790372
mat_12	wsnp_Ku_c28820_38731047	4B	38025565	2	3.47072	0.0363169	-0.361074	0.313923	0.576998	-3.91914	6.92404	0.0103698	74	0.0862124	1.27099	5.26224	346.038	0.790372
mat_12	Excalibur_c24639_398	7B	750605748	2	3.47149	0.0364408	0.801592	2.48596	0.119311	-2.91061	5.27503	0.0245865	72	0.113331	1.15491	5.53616	342.648	0.790372
mat_12	RAC875_c59673_500	4A	681670845	2	3.46498	0.0365075	-0.883267	2.28473	0.13497	3.52674	5.83498	0.0182141	74	0.080708	0.929587	5.66599	350.938	0.790372
mat_12	IAAV2065	2A	765707610	2	3.46345	0.0365588	0.376971	0.969847	0.327971	-2.08346	6.38751	0.0136577	74	0.0893551	1.50437	4.99913	353.239	0.790372
mat_12	Kukri_c3688_407	2B	95761909	2	3.46046	0.0367328	-0.61959	1.49793	0.224981	-3.03114	6.5729	0.012442	73	0.082958	1.26048	5.34204	343.792	0.790372
mat_12	Excalibur_rep_c102881_88	7A	694545795	2	3.46233	0.0367461	1.63547	5.97095	0.0170311	-0.702915	0.135771	0.713618	72	0.104701	1.32108	4.76021	334.789	0.790372
mat_12	BS00027054_51	4B	662147936	2	3.45638	0.0367957	-0.48366	1.306	0.256855	-1.75121	4.21367	0.0436845	74	0.101776	1.14265	5.43691	350.193	0.790372
mat_12	RFL_Contig4336_184	7A	63082316	2	3.45525	0.0368335	-1.13191	6.18371	0.0151798	1.49508	1.36032	0.247278	74	0.0818908	1.22754	5.29532	350.191	0.790372
mat_12	Kukri_rep_c87640_135	3A	573985487	2	3.46415	0.036844	0.618634	1.90892	0.17154	-2.36619	4.02904	0.0486422	70	0.0841525	1.71088	4.81814	332.601	0.790372
mat_12	Kukri_c61725_545	6B	42510462	1	4.53314	0.0370979	NaN	NaN	NaN	NaN	NaN	NaN	65	0.145736	2.08829	3.8254	302.536	0.790416
mat_12	Tdurum_contig82473_67	5B	620827424	2	3.446	0.0372207	0.887199	6.62946	0.0120859	0.824069	0.592599	0.443934	73	0.0682661	7.16102e-05	7.16102	350.715	0.790416
mat_12	BS00022768_51	1D	412224018	2	3.44346	0.0372324	-0.759945	3.65362	0.0598733	-1.37444	1.88831	0.173597	74	0.0811633	0.938425	5.66808	344.531	0.790416
mat_12	RAC875_c38511_91	5B	476805518	2	3.4451	0.0372513	-0.931483	4.40091	0.0394301	1.62533	3.07494	0.0837634	73	0.187906	2.10768	4.37662	345.638	0.790416
mat_12	Ku_c3891_395	4A	27673099	1	4.50579	0.0372686	NaN	NaN	NaN	NaN	NaN	NaN	72	0.0817915	0.908719	6.10876	343.346	0.790416
mat_12	RAC875_c12907_515	6B	682550714	2	3.44128	0.0374579	0.287298	0.576249	0.450299	-2.22037	5.28648	0.0244368	72	0.0749459	0.433928	6.53064	342.618	0.792634
mat_12	Tdurum_contig76116_469	6B	704038802	2	3.421	0.0380049	1.84583	6.61384	0.0121539	0.430083	0.0246977	0.875557	74	0.0707393	0.283426	6.63208	352.343	0.800629
mat_12	RAC875_c14852_2171	6B	156267554	2	3.42113	0.0381525	1.26136	1.52823	0.220452	5.3675	6.79196	0.0111499	72	0.0912647	1.90166	4.51132	332.751	0.800629
mat_12	wsnp_BF291478B_Ta_2_1	6B	239285951	2	3.41662	0.0381574	-1.72902	4.42208	0.0389245	3.90776	5.49695	0.0217726	74	0.0747859	0.831147	5.82122	350.319	0.800629
mat_12	BobWhite_c6055_185	2D	75395153	2	3.41818	0.0381782	0.984861	5.48548	0.0219442	0.810738	0.494089	0.484375	73	0.0857163	0.695475	6.10258	344.499	0.800629
mat_12	wsnp_CAP8_c2677_1394934	2A	603524403	2	3.40968	0.0384002	0.312748	0.611131	0.43689	2.78898	5.41299	0.022766	74	0.0920263	1.31613	5.19804	351.221	0.801363
mat_12	wsnp_Ex_c831_1625061	5B	10524833	2	3.40817	0.0384532	0.416162	0.334003	0.56509	-5.3119	6.80639	0.0110117	74	0.0818979	1.31178	5.22176	350.12	0.801363
mat_12	BS00098292_51	5B	612682909	2	3.40983	0.0384702	-0.865172	5.95637	0.0171257	1.2864	1.46129	0.230679	73	0.0710798	0.200713	6.85874	346.865	0.801363
mat_12	Kukri_c25978_561	2A	740361057	2	3.40654	0.0386638	0.83092	4.02089	0.0487531	1.64054	2.2934	0.134364	72	0.0773212	1.15437	5.39694	339.909	0.803606
mat_12	BS00096470_51	1D	5357536	1	4.42061	0.038909	NaN	NaN	NaN	NaN	NaN	NaN	75	0.0518284	1.11456	5.56526	354.809	0.805311
mat_12	RAC875_c21938_802	6B	716257836	2	3.39504	0.038918	-0.833796	4.52016	0.0368798	1.35869	1.64055	0.204304	74	0.0828196	1.20379	5.34019	350.113	0.805311
mat_12	Tdurum_contig46717_2021	7A	731267873	2	3.38918	0.0393615	1.15438	6.08696	0.0160676	2.13049	2.00257	0.161466	71	0.0922437	1.66209	4.80766	333.688	0.81269
mat_12	BS00105601_51	1A	24321305	2	3.38136	0.0394844	0.118856	0.0855223	0.77079	2.24015	6.45752	0.0132032	73	0.0893948	1.79783	4.70496	344.46	0.81343
mat_12	wsnp_Ku_c13952_22097856	1B	687413626	2	3.39453	0.0396087	-1.23285	6.71236	0.0118086	-1.09579	0.304509	0.582962	66	0.0890593	0.763945	6.0574	312.061	0.813913
mat_12	BS00063928_51	1B	621636618	2	3.36937	0.0399196	0.560669	1.93064	0.16897	2.41254	5.29926	0.0242293	73	0.101924	1.18597	5.44556	344.245	0.813913
mat_12	wsnp_Ex_c1137_2182795	1A	12505477	2	3.36445	0.040023	1.18168	4.1199	0.0460268	-3.0229	4.66976	0.0339794	74	0.0870212	1.53867	4.96061	337.763	0.813913
mat_12	wsnp_JD_c16245_15468917	3B	723032364	2	3.3635	0.0400579	1.47726	3.91942	0.0515019	1.22426	0.621707	0.432967	74	0.0836602	1.06188	5.5179	353.305	0.813913
mat_12	Tdurum_contig4658_346	7B	680171098	2	3.36487	0.040084	1.14182	5.79972	0.0185907	2.69677	2.08847	0.152753	73	0.082033	0.733344	5.51424	335.866	0.813913
mat_12	RAC875_c20700_853	2A	74877814	2	3.36391	0.0401192	-1.18284	5.93142	0.0173506	-1.90841	3.06124	0.0844412	73	0.0787315	1.5637	4.97084	340.846	0.813913
mat_12	Kukri_c10751_1031	3A	688883737	2	3.35988	0.0401906	0.0453273	0.00561663	0.940464	2.9391	5.40271	0.0228909	74	0.0980001	1.51318	4.98568	351.88	0.813913
mat_12	RAC875_c23338_792	6A	615792720	2	3.36655	0.0402658	0.787169	4.09001	0.0470157	2.47349	2.0527	0.156451	70	0.0841269	0.760885	6.1817	343.445	0.813913
mat_12	GENE-1587_448	3D	47190470	2	3.3682	0.040291	-0.416253	0.981081	0.325444	-2.16167	4.49267	0.0376938	69	0.097889	1.31174	5.54281	328.769	0.813913
mat_12	TA002269-1202	2B	647316287	2	3.35288	0.040526	-0.627081	2.32137	0.131988	-2.32583	5.36018	0.0234552	73	0.109571	1.14985	5.52501	344.072	0.814702
mat_12	Ra_c109604_751	7A	246563570	2	3.34937	0.0405796	-1.48059	3.89847	0.0521133	1.22863	0.62413	0.432076	74	0.0793538	1.10452	5.50145	350.702	0.814702
mat_12	BS00023993_51	7A	329783630	1	4.34422	0.0406342	NaN	NaN	NaN	NaN	NaN	NaN	74	0.0601033	1.06564	5.59576	350.447	0.814702
mat_12	RAC875_c346_1226	7A	10901877	2	3.35194	0.0407216	0.960609	5.96261	0.0171421	-0.844791	0.266876	0.607064	71	0.0755106	0.330264	6.59245	341.276	0.814702
mat_12	RFL_Contig876_422	7D	412160724	2	3.34848	0.0409343	-0.812322	2.67846	0.106268	3.48255	5.02485	0.028205	70	0.12787	2.01211	4.5841	331.74	0.814702
mat_12	Excalibur_c50856_63	6D	438893470	2	3.34371	0.0410288	0.613266	2.48004	0.119809	-2.63607	3.29658	0.0737071	71	0.0797439	0.614829	6.39082	337.033	0.814702
mat_12	BS00073132_51	1B	447165486	2	3.33558	0.0411729	-0.500477	1.35662	0.247969	2.27687	4.02775	0.048513	73	0.0768067	1.2872	5.29025	342.414	0.814702
mat_12	BS00023138_51	5A	704515001	2	3.33862	0.0412197	-1.55889	6.50634	0.0129383	-1.64935	2.00561	0.161153	71	0.096684	0.762566	5.76936	331.007	0.814702
mat_12	tplb0025i03_2004	7B	351577517	1	4.32318	0.0412618	NaN	NaN	NaN	NaN	NaN	NaN	71	0.0524661	1.15422	5.84255	338.468	0.814702
mat_12	wsnp_Ex_c52557_56115459	3B	730285326	2	3.32967	0.0413184	1.1742	3.92287	0.051402	1.54874	1.05551	0.307634	74	0.0802143	0.72643	5.96788	352.057	0.814702
mat_12	BS00011899_51	6A	616819344	2	3.35852	0.0413306	0.196011	0.17183	0.679944	4.27005	6.17165	0.0157424	62	0.100478	2.16212	4.00821	291.535	0.814702
mat_12	wsnp_Ku_c2624_4986980	1D	408244046	2	3.33232	0.0413753	-0.769001	4.12819	0.0459178	-1.43208	1.57045	0.214253	72	0.074197	0.337197	6.70543	345.704	0.814702
mat_12	RAC875_c25271_138	2B	762518922	1	4.30852	0.041545	NaN	NaN	NaN	NaN	NaN	NaN	72	0.0689374	1.19278	5.7192	347.141	0.816242
mat_12	D_contig78519_72	7D	10724734	1	4.3027	0.0416281	NaN	NaN	NaN	NaN	NaN	NaN	73	0.0508738	0.460168	6.66847	347.569	0.816242
mat_12	Kukri_c31822_568	6B	156373411	2	3.31268	0.0419669	-1.74537	4.46821	0.0379482	3.73919	5.35699	0.0234552	74	0.0912996	0.985522	5.62378	347.707	0.818907
mat_12	BS00065029_51	5B	620019412	2	3.31233	0.0421387	-0.907468	6.46282	0.0131985	0.736847	0.455592	0.501884	72	0.0760668	0.13487	7.08981	343.339	0.818907
mat_12	wsnp_Ku_c7266_12551048	1D	408242254	2	3.30748	0.0421677	-0.855001	6.52046	0.0127521	0.704733	0.171489	0.680006	74	0.0725656	0.273101	6.66599	350.989	0.818907
mat_12	RFL_Contig602_627	7A	733571639	2	3.30538	0.0422487	-0.778352	3.32511	0.072323	2.32975	3.90211	0.0520064	74	0.0876984	1.48892	5.0287	352.81	0.818907
mat_12	TA005561-0543	6D	465050342	1	4.27099	0.0422677	NaN	NaN	NaN	NaN	NaN	NaN	75	0.0514294	0.583155	6.30615	355.361	0.818907
mat_12	IACX5670	2D	83142024	2	3.30635	0.0422893	-0.900053	2.46333	0.120916	-2.96676	5.87722	0.01785	73	0.0776775	1.37235	5.24023	344.597	0.818907
mat_12	wsnp_CAP11_rep_c4076_1926235	5A	595409709	2	3.30251	0.0427749	0.526921	1.41917	0.237682	-1.81795	3.91549	0.0518949	69	0.0829396	1.10792	5.44097	324.297	0.826226
mat_12	Kukri_c6051_640	1D	412158878	2	3.28878	0.0429758	0.693482	3.30465	0.0732439	-1.60969	2.00095	0.161511	73	0.0753095	0.542822	6.32128	346.443	0.826226
mat_12	wsnp_BE498985A_Ta_2_1	7B	657933278	2	3.29023	0.0429993	-0.440987	0.960405	0.330412	-1.93327	4.18267	0.0445467	72	0.0828328	1.12789	5.43837	340.637	0.826226
mat_12	Kukri_c16758_443	2B	17389126	2	3.28764	0.0430206	-0.73705	3.39139	0.0696566	-2.11653	4.31049	0.0414491	73	0.0861495	0.851075	5.88499	350.849	0.826226
mat_12	Kukri_rep_c71152_906	2D	75393708	2	3.27384	0.0434889	0.967785	5.59274	0.020695	0.456322	0.17658	0.675563	74	0.0721952	0.487612	6.33294	350.073	0.829081
mat_12	Ku_c31046_525	3B	580033561	2	3.27741	0.043507	-1.21982	3.74177	0.0570537	-4.48526	4.53915	0.0365933	72	0.0750611	0.844973	5.98421	342.046	0.829081
mat_12	D_wsnpbe403818_Contig1_1	6D	389703292	2	3.27941	0.043511	0.0885278	0.021981	0.882564	-4.1103	6.25301	0.0147424	71	0.0918301	1.65586	4.9033	334.686	0.829081
mat_12	Excalibur_c84687_162	2A	534934212	2	3.27297	0.0435239	0.102392	0.020689	0.886026	6.67436	5.97326	0.0169406	74	0.0776756	1.08386	5.50198	343.648	0.829081
mat_12	RAC875_c54818_481	6B	146144682	2	3.29775	0.0436584	1.11539	2.49196	0.119601	3.38331	6.31378	0.0146397	62	0.0998724	2.22449	4.48166	282.118	0.829954
mat_12	wsnp_Ra_c13881_21836489	6D	409344012	2	3.26705	0.04384	0.658351	2.57439	0.112984	-1.69751	3.22151	0.0768736	73	0.102637	1.22674	5.43606	347.995	0.831715
mat_12	BS00068012_51	3D	263337341	2	3.25948	0.0441453	0.0621214	0.0142107	0.905442	3.03679	6.48558	0.0130137	73	0.0940376	1.14395	5.52279	344.733	0.832035
mat_12	Ku_c16636_347	1B	619690135	2	3.26035	0.0441922	-0.544197	1.7781	0.186645	2.40788	5.20959	0.0254609	72	0.0825776	1.17929	5.54009	335.262	0.832035
mat_12	Kukri_c58155_786	1A	504399850	2	3.25832	0.0441926	-0.953344	3.76243	0.0563341	1.13764	1.00911	0.31848	73	0.0844008	0.858642	5.8761	350.174	0.832035
mat_12	BobWhite_c1715_887	1D	8185497	2	3.25586	0.0442127	0.431178	0.928655	0.338394	1.77731	4.75671	0.0324065	74	0.0910325	1.62069	4.88156	352.825	0.832035
mat_12	Excalibur_c25640_110	1B	687802260	2	3.25853	0.0443499	1.14406	4.35614	0.0405183	1.05539	0.931823	0.337713	71	0.0759276	0.467494	6.42161	344.003	0.832492
mat_12	BS00036767_51	2A	74107957	2	3.25109	0.0445685	1.16571	5.76623	0.018958	-1.90156	2.87974	0.0940804	72	0.0965357	1.4014	5.25045	343.336	0.832492
mat_12	Tdurum_contig5311_67	2A	75292083	2	3.25109	0.0445685	1.16571	5.76623	0.018958	-1.90156	2.87974	0.0940804	72	0.0965357	1.4014	5.25045	343.336	0.832492
mat_12	BS00022212_51	3D	278967660	2	3.24848	0.044593	0.329343	0.400507	0.528832	-2.53595	6.38124	0.0137332	73	0.0917304	1.17824	5.26823	343.965	0.832492
mat_12	Kukri_rep_c103404_314	7D	13604851	2	3.23936	0.0448878	-0.899676	6.47312	0.0130671	-0.0395483	0.00191202	0.965242	74	0.0908817	0.715005	6.00502	350.275	0.836184
mat_12	BS00064967_51	6B	706332736	2	3.3915	0.0450504	-1.05385	3.80062	0.0592822	-3.50419	2.17233	0.149451	36	0.121915	2.91685	2.94258	164.702	0.836184
mat_12	BobWhite_c37358_208	1A	571788093	2	3.23645	0.0450881	1.08994	6.00827	0.0166676	0.907595	0.891626	0.348195	73	0.0806374	0.680007	6.14526	349.147	0.836184
mat_12	BS00056550_51	1A	7294564	2	3.23499	0.0451484	0.0778364	0.0208283	0.885651	2.30764	5.76772	0.0189059	73	0.0748771	1.5497	5.03426	345.84	0.836184
mat_12	RAC875_c29540_1109	1A	504242168	2	3.22723	0.0454709	-1.2441	5.54744	0.0212355	-2.49221	2.27132	0.136163	73	0.0777485	0.80113	5.92506	344.199	0.838785
mat_12	Excalibur_c22877_1990	2D	75396081	2	3.22607	0.0455196	0.972263	5.47923	0.0220171	0.590899	0.261517	0.610645	73	0.0707699	0.552698	6.34752	341.879	0.838785
mat_12	BS00082503_51	1D	412219194	2	3.21829	0.0457649	-0.782403	4.20302	0.043944	-1.03452	1.07228	0.303848	74	0.0732061	0.483023	6.34192	350.116	0.838785
mat_12	wsnp_Ex_c194_381656	1B	619685724	2	3.2111	0.0461495	-0.552968	1.85889	0.177001	2.31441	5.11903	0.0266829	73	0.0841096	1.12645	5.56937	348.387	0.838785
mat_12	Excalibur_c34765_1023	UN	93451047	2	3.21056	0.0462551	-0.911936	5.41074	0.0228732	-0.971495	0.933396	0.337261	72	0.0736321	0.494254	6.26109	340.853	0.838785
mat_12	Excalibur_c35561_309	5B	612682399	2	3.20819	0.0462727	-0.863832	5.93866	0.017285	1.0373	0.947355	0.333652	73	0.0684244	0.189568	6.89213	346.754	0.838785
mat_12	BS00023130_51	1A	5024184	2	3.19747	0.0466495	0.137043	0.035059	0.851992	3.50801	5.2309	0.0250894	74	0.104487	1.41425	5.14763	352.801	0.838785
mat_12	Kukri_c5097_2340	UN	110797682	2	3.19747	0.0466495	0.137043	0.035059	0.851992	3.50801	5.2309	0.0250894	74	0.104487	1.41425	5.14763	352.801	0.838785
mat_12	BobWhite_c4517_120	2A	751663182	2	3.19726	0.0466585	-0.071662	0.0300208	0.862923	-2.67732	6.37565	0.0137418	74	0.0770519	1.33992	5.2216	354.032	0.838785
mat_12	RAC875_c11289_71	6D	437324961	1	4.09263	0.0466835	NaN	NaN	NaN	NaN	NaN	NaN	75	0.0477259	0.597548	6.29562	355.163	0.838785
mat_12	RFL_Contig3811_3709	5B	403547263	2	3.19453	0.0467758	-0.973246	6.31813	0.014157	-1.14936	0.173199	0.678505	74	0.0709545	0.705854	6.02294	350.492	0.838785
mat_12	BS00027058_51	4B	662147872	2	3.19631	0.0467805	-0.409104	0.940193	0.335474	-1.78739	4.30238	0.0416355	73	0.0795985	0.945619	5.78442	355.244	0.838785
mat_12	wsnp_Ex_c15674_24004513	2B	789869094	2	3.19546	0.0468167	-1.16559	3.96947	0.0501243	-4.70407	3.17156	0.079149	73	0.0801443	1.18745	5.44603	345.406	0.838785
mat_12	Tdurum_contig82812_213	2A	75316383	2	3.19484	0.0470129	-1.18024	5.71788	0.0194848	-1.94903	2.70208	0.104702	71	0.105069	1.56556	5.2034	335.13	0.838785
mat_12	Kukri_rep_c69970_717	3A	650425815	2	3.19224	0.047039	0.513394	1.25369	0.266622	-2.29776	3.62093	0.061112	72	0.0773718	1.39938	5.27069	341.93	0.838785
mat_12	wsnp_Ex_c14478_22481430	4A	8204882	2	3.18787	0.0470632	-0.868933	4.63293	0.0346701	1.34545	2.10382	0.151215	74	0.0749491	0.40354	6.47322	351.77	0.838785
mat_12	wsnp_Ex_c22089_31269531	4B	573294623	2	3.18448	0.0472102	2.80646	4.04055	0.0481149	4.50445	6.27136	0.0145044	74	0.0833702	1.49157	5.03869	349.81	0.838785
mat_12	wsnp_Ku_c9583_16038698	6A	63768665	2	3.18448	0.0472102	2.80646	4.04055	0.0481149	4.50445	6.27136	0.0145044	74	0.0833702	1.49157	5.03869	349.81	0.838785
mat_12	TA001512-0387	4A	545601755	2	3.17999	0.0474053	-1.19219	6.35468	0.0138916	0.781725	0.422376	0.517794	74	0.0695586	0.913463	5.73547	349.709	0.838785
mat_12	IAAV2776	1D	119403683	2	3.18015	0.0474798	-1.53074	3.69465	0.0585443	-3.85946	5.48302	0.0219729	73	0.0733184	0.903614	5.6954	345.978	0.838785
mat_12	wsnp_Ex_c41150_48040078	7A	78434401	2	3.1779	0.0474968	0.378633	0.856878	0.357664	2.25638	6.10322	0.0158294	74	0.100744	1.187	5.39168	352.836	0.838785
mat_12	GENE-0686_804	2A	763693556	2	3.1796	0.0475038	-0.339045	0.285803	0.59457	-3.04414	6.21425	0.0149733	73	0.0698042	0.789339	5.9737	354.164	0.838785
mat_12	IAAV3916	5D	444724346	2	3.17579	0.0476705	-0.863553	4.86358	0.0306232	1.04664	0.889191	0.34885	73	0.0690475	0.525191	6.376	345.507	0.838785
mat_12	BS00027770_51	6B	690969557	2	3.17356	0.0476865	1.40794	3.50849	0.0650588	4.22018	4.53085	0.036664	74	0.136705	1.41192	5.13176	349.385	0.838785
mat_12	Excalibur_c28017_641	2A	603560881	2	3.17343	0.0477742	-0.309459	0.603246	0.439886	2.72832	4.97081	0.0288985	73	0.0733386	0.910771	5.80138	351.423	0.838785
mat_12	BS00109736_51	4A	544616498	2	3.17023	0.0478331	-1.32555	6.27145	0.0145037	1.15982	1.12347	0.292668	74	0.0845596	1.17495	5.42806	350.411	0.838785
mat_12	wsnp_Ex_c24443_33688235	4A	544891504	2	3.17023	0.0478331	-1.32555	6.27145	0.0145037	1.15982	1.12347	0.292668	74	0.0845596	1.17495	5.42806	350.411	0.838785
mat_12	Excalibur_c57078_255	4A	671933913	2	3.17206	0.0478342	0.709863	1.35591	0.248091	3.18248	6.10262	0.0158677	73	0.0726564	0.962105	5.76218	344.911	0.838785
mat_12	Ku_c55173_549	5B	570927417	2	3.16894	0.0478896	-0.611224	2.52139	0.116634	-2.14818	4.07133	0.0472932	74	0.114033	2.31458	4.21499	332.435	0.838785
mat_12	RAC875_c55214_932	3B	463255392	2	3.1659	0.0481058	0.796974	3.28442	0.0741096	-2.44641	4.44414	0.0385025	73	0.075821	0.78597	5.84143	343.625	0.840037
mat_12	BS00082460_51	6A	615589067	2	3.15916	0.0484047	-0.794893	4.23244	0.0432811	1.36221	1.48487	0.226992	73	0.090607	0.994092	5.77049	344.646	0.840037
mat_12	Excalibur_c29748_954	6A	615805999	2	3.15579	0.0485548	-0.55982	2.24508	0.138412	-2.16323	3.90896	0.0518588	73	0.079217	1.14099	5.32937	343.393	0.840037
mat_12	BS00078522_51	7A	273016134	2	3.15379	0.0485622	0.602947	2.06973	0.154522	-3.06696	5.55094	0.0211582	74	0.0674054	7.25573e-05	7.25573	384.187	0.840037
mat_12	Excalibur_c34091_311	7A	281374111	2	3.15379	0.0485622	0.602947	2.06973	0.154522	-3.06696	5.55094	0.0211582	74	0.0674054	7.25573e-05	7.25573	384.187	0.840037
mat_12	Excalibur_c36280_764	2B	697512054	2	3.16512	0.0485871	0.185951	0.220525	0.640165	2.69098	6.29371	0.0145429	68	0.0803824	1.40793	5.17243	321.455	0.840037
mat_12	BS00022174_51	4A	570267501	2	3.15886	0.0485898	0.949885	6.30567	0.0143466	1.16899	0.182908	0.670199	71	0.0751786	0.561307	6.49924	343.107	0.840037
mat_12	CAP11_c315_247	4A	570267381	2	3.14426	0.0489899	1.01755	6.20764	0.0149922	-0.933437	0.735817	0.393812	74	0.0796588	1.14913	5.44357	350.476	0.841771
mat_12	wsnp_Ex_c16127_24561453	5A	457436281	2	3.15366	0.0490037	0.87882	6.1908	0.0152972	1.46231	0.268053	0.606321	69	0.0857516	0.65389	6.19788	341.424	0.841771
mat_12	BS00022747_51	7A	610929666	2	3.14646	0.0490581	-0.164966	0.118077	0.732145	2.76849	6.29198	0.0144147	72	0.0867332	1.04271	5.52179	341.683	0.841771
mat_12	wsnp_BM134363A_Ta_2_4	7A	642023162	2	3.14014	0.0491763	1.50452	5.23885	0.024983	-3.29987	1.52922	0.220193	74	0.0745468	1.2178	5.3741	352.556	0.841771
mat_12	IACX6007	5B	403713955	2	3.14797	0.0493548	-1.07057	6.28663	0.014596	-0.157729	0.0162874	0.89883	68	0.0791207	0.826599	6.21705	324.825	0.841771
mat_12	BobWhite_c31011_102	6A	48528643	2	3.13539	0.0494747	0.504285	0.556332	0.45817	-3.38479	6.11881	0.0157346	73	0.0996497	1.05756	5.71466	346.606	0.841771
mat_12	Excalibur_c15733_252	2A	74789344	2	3.13855	0.0495033	-1.15972	5.69367	0.0197343	-1.83318	2.53145	0.116104	71	0.105771	1.71099	4.69617	337.063	0.841771
mat_12	Ku_c28007_1398	1A	4500524	2	3.1317	0.0495597	-0.146529	0.0402889	0.841475	3.478	5.09375	0.0270052	74	0.101909	1.31453	5.28693	351.284	0.841771
mat_12	Excalibur_c6057_281	6A	63775333	2	3.13061	0.0496095	-2.78415	3.98601	0.0496092	4.47649	6.16347	0.0153405	74	0.0711809	1.39698	5.1539	352.798	0.841771
mat_12	GENE-0511_484	1D	414301698	2	3.13198	0.0497152	0.833255	4.99242	0.0286081	-1.00646	0.700183	0.40553	72	0.0661373	0.142957	7.01021	339.018	0.841771
mat_12	BS00043082_51	1B	200098987	2	3.1296	0.0497387	-0.902989	2.46716	0.120632	-2.83424	5.47637	0.0220505	73	0.0738153	1.36466	5.28088	345.56	0.841771
mat_12	RAC875_c10194_910	3B	723276128	1	3.98074	0.0498618	NaN	NaN	NaN	NaN	NaN	NaN	72	0.0508756	0.572814	6.53428	344.485	0.841771
mat_12	wsnp_Ku_rep_c76865_75281903	2D	155735161	2	3.12313	0.0499529	1.00166	5.84405	0.0181275	1.0424	1.07453	0.303346	74	0.130229	1.59048	4.9358	351.816	0.841771
mat_12	wsnp_Ku_c46762_53407442	3A	731005399	2	3.12131	0.0501195	1.03	6.20963	0.0150092	0.771797	0.654911	0.421028	73	0.0756847	0.546243	6.32936	345.483	0.841771
mat_12	IAAV7544	7D	123055170	2	3.12063	0.0501511	0.137888	0.0478617	0.827446	-4.39475	5.79717	0.0186156	73	0.0741543	0.958106	5.77367	345.415	0.841771
mat_12	TA012713-0667	1D	104569802	2	3.12447	0.0502378	0.283796	0.59774	0.442082	3.78942	5.73895	0.0193101	70	0.136913	1.22432	5.18658	317.252	0.841771
mat_12	Kukri_c66626_288	UN	479714991	2	3.11866	0.0502419	-2.0119	3.95908	0.0504177	-3.95452	5.01873	0.0281614	73	0.109738	1.80612	4.81353	348.016	0.841771
mat_12	Excalibur_c32219_491	6D	466329967	2	3.11548	0.0505628	0.977254	5.71504	0.0195139	-1.13362	0.583665	0.447447	71	0.086274	0.885651	6.0351	337.376	0.841771
mat_12	RAC875_c88582_131	4A	627820124	2	3.11314	0.0505836	-1.10543	6.11297	0.0158167	0.0271471	0.000362255	0.984868	72	0.123974	1.47715	4.57299	335.621	0.841771
mat_12	BS00023072_51	5B	47576429	2	3.11134	0.0506672	1.02088	5.98541	0.0169031	0.851531	0.827904	0.365958	72	0.0821883	1.21696	5.51869	342.145	0.841771
mat_12	Excalibur_c4261_342	6A	608115792	2	3.10596	0.0507492	-1.78751	6.00214	0.0166868	0.418853	0.0236152	0.878292	74	0.0720609	0.498804	6.33798	343.191	0.841771
mat_12	RAC875_c2338_53	6D	462013888	2	3.10596	0.0507492	-1.78751	6.00214	0.0166868	0.418853	0.0236152	0.878292	74	0.0720609	0.498804	6.33798	343.191	0.841771
mat_12	Excalibur_c10441_984	2B	763630772	2	3.10729	0.0507708	-0.796195	2.10035	0.151607	2.92495	5.8106	0.0184847	73	0.0901654	1.12457	5.52758	350.947	0.841771
mat_12	Ex_c4208_839	5A	573303002	1	3.94027	0.0508501	NaN	NaN	NaN	NaN	NaN	NaN	75	0.0826136	1.43592	5.22758	356.698	0.841771
mat_12	BS00066475_51	6A	584987734	2	3.09961	0.0512168	-1.00968	2.66604	0.106938	-1.48308	1.24015	0.269197	72	0.0727099	0.737743	6.14292	342.128	0.846344
mat_12	RAC875_c10194_673	3A	683071041	2	3.09118	0.0515293	-0.983698	5.94522	0.0172258	0.202714	0.0434884	0.835397	73	0.0746698	0.893164	5.65647	345.206	0.848173
mat_12	Excalibur_c3108_2958	2A	74963919	2	3.08788	0.0516023	-0.897118	4.79	0.0318249	0.812928	0.497336	0.482917	74	0.0677683	0.698189	6.04857	345.421	0.848173
mat_12	RAC875_c42756_168	4A	495799905	2	3.08932	0.0516174	-1.06001	6.13941	0.0155669	1.01403	0.952119	0.332448	73	0.0792843	1.07644	5.63616	346.032	0.848173
mat_12	BS00072791_51	1B	629262942	2	3.09953	0.0516902	0.0730625	0.0204403	0.88675	4.98727	6.19265	0.0153593	67	0.0788374	1.23987	5.52819	317.872	0.848173
mat_12	BS00066015_51	7D	77175746	2	3.08825	0.0519351	0.0583867	0.0142286	0.905397	-4.93948	5.97261	0.0170905	70	0.0871395	1.39654	5.40279	333.808	0.849427
mat_12	wsnp_Ex_c8303_14001708	2D	481601503	2	3.08239	0.0519483	0.150317	0.129762	0.719734	-2.34773	5.8107	0.0184838	73	0.0731589	0.927903	5.81609	346.347	0.849427
mat_12	wsnp_Ex_c7713_13153321	4B	244773759	2	3.07267	0.0523311	-1.16943	2.60726	0.11069	-5.1928	5.31975	0.0239257	74	0.0671101	0.335369	6.61216	361.722	0.851768
mat_12	BS00039983_51	2A	77163077	2	3.07207	0.0523602	-1.16268	5.80632	0.0184905	-1.6095	2.25323	0.137649	74	0.104891	1.28049	5.37642	350.825	0.851768
mat_12	Excalibur_c53864_331	4A	673446685	2	3.07095	0.0524141	0.733148	1.47974	0.227733	3.33572	5.63498	0.0202379	74	0.0764127	0.642044	6.13893	355.825	0.851768
mat_12	JG_c936_115	2A	71421116	2	3.07009	0.0524557	-0.927743	5.43009	0.0225598	-0.939862	1.0592	0.306796	74	0.0825395	0.728922	6.0674	340.301	0.851768
mat_12	TA005876-0602	6B	716258093	2	3.06817	0.0525489	1.01546	2.14134	0.147669	-4.8829	2.70711	0.104201	74	0.0822892	1.6047	4.94164	350.007	0.851802
mat_12	RAC875_c7965_80	6B	634333334	2	3.06968	0.0526467	0.81011	2.27015	0.136324	-1.75105	2.84317	0.0961528	72	0.0980764	1.77596	4.77866	344.852	0.851911
mat_12	TA005380-0966	4A	596836024	2	3.05918	0.0529862	0.904889	5.7337	0.0192108	0.951161	0.976534	0.32632	74	0.0765436	1.08186	5.54643	345.102	0.855924
mat_12	BobWhite_c47357_535	2B	698968707	2	3.05453	0.0534762	0.215321	0.303742	0.583301	2.91675	6.01942	0.016642	71	0.0972513	1.7104	4.6038	331.427	0.857859
mat_12	Kukri_rep_c83485_398	2A	74136298	2	3.04701	0.0536699	1.03268	5.39542	0.0230194	-1.77027	2.34848	0.129788	73	0.0785431	1.27588	5.39314	347.016	0.857859
mat_12	BS00051826_51	1D	56751122	1	3.84443	0.0536754	NaN	NaN	NaN	NaN	NaN	NaN	75	0.0494844	0.50218	6.47032	355.28	0.857859
mat_12	Ra_c63534_581	2D	361255875	2	3.04291	0.053788	-1.22554	1.46957	0.229323	1.56327	0.958854	0.33071	74	0.140599	1.84508	4.70833	355.154	0.857859
mat_12	IAAV1502	5A	588746003	2	3.04366	0.0539233	1.49367	4.9309	0.0295729	0.237155	0.023738	0.877991	72	0.0743071	0.894934	5.91516	339.444	0.857859
mat_12	wsnp_Ex_c10094_16590615	7A	252180406	2	3.03893	0.0540713	1.43529	4.61065	0.0351418	-3.77002	3.13823	0.0807081	73	0.082002	0.798474	5.95714	347.028	0.857859
mat_12	BobWhite_c22036_399	5B	617142015	2	3.03679	0.0541778	0.868019	5.86524	0.0179625	0.771577	0.513466	0.47596	73	0.0665206	0.283997	6.76296	347.544	0.857859
mat_12	wsnp_Ku_c25613_35580381	5B	617826452	2	3.03679	0.0541778	0.868019	5.86524	0.0179625	0.771577	0.513466	0.47596	73	0.0665206	0.283997	6.76296	347.544	0.857859
mat_12	IAAV8527	6D	389606942	2	3.03572	0.0542313	-0.816207	2.10268	0.151384	-2.55719	2.20777	0.141683	73	0.0705093	1.59342	5.02507	345.669	0.857859
mat_12	BobWhite_c14409_206	4A	617944112	1	3.88098	0.0542778	NaN	NaN	NaN	NaN	NaN	NaN	52	0.0575173	0.310953	6.66702	245.896	0.857859
mat_12	BS00083504_51	1D	483145283	2	3.03218	0.0544086	1.13325	3.28203	0.0742125	-2.82553	4.65736	0.0342565	73	0.0854809	1.16372	5.54309	342.636	0.857859
mat_12	wsnp_JG_c402_268605	4A	714206891	2	3.03039	0.0544989	0.972712	5.36306	0.0234193	-0.907816	0.899345	0.34613	73	0.0853186	0.901447	5.86309	336.624	0.857859
mat_12	wsnp_Ex_rep_c66651_64963120	5B	403780073	2	3.03039	0.0544989	0.972712	5.36306	0.0234193	-0.907816	0.899345	0.34613	73	0.0853186	0.901447	5.86309	336.624	0.857859
mat_12	BS00063769_51	UN	12581916	2	3.02956	0.0545405	1.00446	5.92385	0.0174195	0.712609	0.622673	0.432646	73	0.0896015	1.0184	5.70321	345.823	0.857859
mat_12	Excalibur_c30975_133	1B	319962313	1	3.82699	0.0546037	NaN	NaN	NaN	NaN	NaN	NaN	68	0.0515748	1.00744	5.39983	320.059	0.857859
mat_12	Tdurum_contig42797_3196	1B	548624736	2	3.02463	0.0547034	-1.17431	2.85226	0.0955129	-3.84385	1.673	0.199935	74	0.0683486	1.02819	5.62843	351.827	0.857859
mat_12	CAP11_c59_418	3B	779542257	2	3.02599	0.0547203	1.0212	5.85852	0.0180258	0.330192	0.10527	0.746536	73	0.08193	0.78161	6.03602	343.555	0.857859
mat_12	RAC875_c45702_412	2A	76349893	2	3.02357	0.054757	0.890481	5.09154	0.0270374	0.575873	0.283219	0.596215	74	0.0658749	0.446883	6.44164	351.154	0.857859
mat_12	Excalibur_c2795_1518	5D	546921418	2	3.02033	0.0551855	-0.822697	5.32392	0.0239965	-1.44231	1.17808	0.281471	71	0.0643567	0.123938	7.13315	344.594	0.863127
mat_12	TA003505-0833	7A	545061516	2	3.0125	0.0554057	1.03862	2.71099	0.104017	3.0251	4.59214	0.0354995	73	0.0715064	0.559892	6.34896	345.039	0.865124
mat_12	wsnp_Ex_c27290_36498462	1D	408072755	2	3.00726	0.0557626	-0.754861	3.9949	0.0494678	-1.34683	1.24375	0.268511	72	0.0644044	0.320081	6.72125	344.043	0.866751
mat_12	Kukri_c50467_1017	5D	362063199	2	3.0047	0.0558061	-1.03951	4.67486	0.033931	0.379228	0.104881	0.746988	73	0.0697973	0.502136	6.39476	345.377	0.866751
mat_12	Tdurum_contig49583_669	5B	682839427	2	3.00334	0.055876	1.43204	4.91632	0.0297616	0.274711	0.053734	0.817346	73	0.114825	1.31255	5.42489	347.43	0.866751
mat_12	wsnp_Ex_c7362_12622736	1A	369501406	2	3.00147	0.0558862	0.915838	1.78453	0.185744	3.08656	2.49647	0.118425	74	0.128968	1.98659	4.60373	350.269	0.866751
mat_12	RAC875_c691_1486	6A	533256664	2	2.99688	0.0562099	-0.484847	0.837213	0.363249	-4.69863	5.63788	0.0202442	73	0.104096	1.52303	5.12274	346.042	0.866751
mat_12	BobWhite_c2027_215	1A	556793016	2	2.99498	0.0563088	1.05668	5.74561	0.019127	-0.819303	0.634237	0.428423	73	0.068909	1.04419	5.69515	349.063	0.866751
mat_12	wsnp_JD_c6562_7716043	5B	620018354	2	2.99559	0.0563659	-0.83811	5.55564	0.0211827	0.92804	0.724171	0.39764	72	0.0648643	0.219377	6.91861	343.119	0.866751
mat_12	CAP8_c42_161	3B	779542562	2	2.99512	0.0563905	1.03623	5.81082	0.0185195	0.352284	0.117488	0.732788	72	0.0722378	0.868995	6.01129	342.573	0.866751
mat_12	wsnp_Ex_c1085_2078944	1D	8185447	2	2.99278	0.0564235	-0.500653	1.3545	0.248335	1.7476	4.08484	0.0469885	73	0.0748136	1.38244	5.28593	345.712	0.866751
mat_12	BS00062869_51	1A	249380203	2	2.99253	0.0564366	-1.03623	2.47521	0.120039	-1.86392	2.23781	0.139042	73	0.0670336	0.788785	6.03491	347.615	0.866751
mat_12	Excalibur_c22830_1989	4A	739036947	2	2.98891	0.0566255	-0.446686	1.41487	0.238157	-2.17418	4.82972	0.0311902	73	0.0900463	1.04741	5.67657	346.212	0.868226
mat_12	RFL_Contig5917_2433	2D	83167370	2	2.9813	0.0569381	-0.723104	1.786	0.185565	-2.83915	5.48665	0.0218919	74	0.0759989	1.37268	5.21499	350.268	0.790372
mat_12	BS00063748_51	2A	76344907	2	2.98121	0.0570295	-0.883188	4.59907	0.035365	0.936466	0.666317	0.417031	73	0.0652968	0.846819	5.9351	342.3	0.87028
mat_12	BobWhite_c19647_159	2A	186432769	2	2.97474	0.0572842	-1.03174	5.9494	0.0171535	0.713075	0.447865	0.505462	74	0.083842	1.34292	5.25604	349.191	0.87028
mat_12	wsnp_Ex_c7907_13427724	6B	118967399	1	3.73131	0.0573374	NaN	NaN	NaN	NaN	NaN	NaN	73	0.0545673	0.676692	6.40572	348.134	0.87028
mat_12	Kukri_c39223_831	1B	640556038	2	2.97286	0.0573838	-1.05305	5.71536	0.0193973	-0.730711	0.598252	0.441743	74	0.0816078	1.03866	5.63262	343.051	0.87028
mat_12	IAAV3946	7A	268179045	2	2.97398	0.0574115	0.355625	0.685952	0.410282	-3.12609	5.82245	0.0183702	73	0.0674389	1.0175	5.73164	345.461	0.87028
mat_12	BobWhite_c6998_365	2D	343145828	1	3.73371	0.0576186	NaN	NaN	NaN	NaN	NaN	NaN	67	0.0458736	0.778018	5.79858	314.797	0.87028
mat_12	wsnp_Ex_c25445_34710489	2D	378898804	2	2.9708	0.0577618	-0.166506	0.163312	0.687358	-1.89742	5.72266	0.0194359	71	0.0716678	1.18442	5.46125	335.555	0.87028
mat_12	Ku_c35823_743	2D	571178794	1	3.72278	0.057788	NaN	NaN	NaN	NaN	NaN	NaN	70	0.0467364	0.473595	6.7351	334.673	0.87028
mat_12	wsnp_BE445113A_Ta_2_1	1A	501030990	1	3.73096	0.0579865	NaN	NaN	NaN	NaN	NaN	NaN	63	0.0795183	2.06703	3.41631	288.99	0.87028
mat_12	wsnp_Ex_c21930_31102685	3B	95151348	2	2.96639	0.0579971	-1.19686	5.70299	0.0196379	-0.854761	0.75816	0.386881	71	0.0656759	0.278381	6.93576	326.928	0.87028
mat_12	TA004476-0719	1A	508136407	1	3.71943	0.0580856	NaN	NaN	NaN	NaN	NaN	NaN	67	0.0450736	0.117335	7.32318	320.539	0.87028
mat_12	IAAV1410	7D	619884242	2	2.95869	0.0581407	0.575228	1.09255	0.299357	1.61699	2.48776	0.119059	74	0.0732841	1.42566	5.15087	352.942	0.998153
mat_12	wsnp_Ex_c1997_3755945	1A	514137620	2	2.95876	0.0582242	-0.731184	3.26139	0.0751087	-2.1607	4.07283	0.0473049	73	0.0649357	0.688754	6.13459	347.482	0.87028
mat_12	TA001117-0895	7A	33364972	2	2.95368	0.0584113	-1.37944	4.59789	0.0353412	-0.859386	0.802671	0.373241	74	0.0717347	0.793379	5.94372	350.212	0.87028
mat_12	Excalibur_c9001_569	3A	322880368	2	2.96201	0.0586288	0.252178	0.320766	0.573068	2.55914	5.57237	0.0212095	67	0.0841476	2.1382	3.97592	312.808	0.87028
mat_12	IAAV6957	7A	675231735	2	2.96064	0.0587023	-0.113655	0.078895	0.779679	-2.75548	5.85382	0.0183064	67	0.0757123	1.07814	5.57113	316.018	0.87028
mat_12	Tdurum_contig48302_532	2A	74788492	2	2.95038	0.058767	1.15147	5.58085	0.0209025	-1.61425	2.11951	0.149841	72	0.076637	1.24206	5.58208	343.116	0.87028
mat_12	Jagger_c505_141	5B	403855494	2	2.94705	0.0587704	-0.920786	5.18646	0.0256939	-0.937334	0.951784	0.332487	74	0.0673324	0.597713	6.22062	348.208	0.87028
mat_12	Tdurum_contig27973_306	4A	628491952	2	2.94701	0.05895	-1.47759	5.41256	0.022851	0.662602	0.327393	0.569006	72	0.0977977	1.58137	4.82733	339.127	0.87028
mat_12	CAP12_c4778_199	3B	144057097	2	2.93843	0.059329	1.11515	4.05815	0.0476947	-0.374883	0.119155	0.730959	73	0.0624438	0.306182	6.75619	356.327	0.87028
mat_12	Tdurum_contig81113_395	UN	110650912	2	2.9382	0.0594317	-0.801678	2.08279	0.153365	-3.76465	4.87089	0.0305477	72	0.0713115	1.04269	5.54103	340.104	0.936196
mat_12	tplb0045p11_893	7A	675235582	2	2.93276	0.0597312	-0.0817458	0.0387557	0.844496	-2.28651	5.61603	0.0205178	72	0.0796116	1.48723	5.09338	343.205	0.87028
mat_12	tplb0058p02_2806	7B	701304687	2	2.93254	0.0597432	-0.932831	5.85335	0.0181112	-0.52729	0.0807628	0.777094	72	0.105967	2.23087	4.43057	343.351	0.87028
mat_12	Kukri_c50071_1084	7A	663529817	2	2.9338	0.0597668	-0.00845367	0.000207713	0.988542	-4.35551	5.80847	0.0185803	71	0.687454	4.24783	2.6171	320.679	0.87028
mat_12	JD_c3930_358	4D	422083232	2	2.91885	0.0603245	0.88844	2.27843	0.135501	-6.02683	4.26398	0.0424808	74	0.0670404	1.04608	5.64907	347.724	0.87028
mat_12	Ku_c5938_4221	7A	76497990	2	2.91834	0.060353	0.412997	0.564501	0.454868	-2.51637	5.82369	0.0183225	74	0.0896455	2.07073	4.48028	351.328	0.87028
mat_12	tplb0024j12_840	1D	228440922	2	2.92406	0.0604022	0.775903	4.47372	0.0380331	-1.80668	2.11518	0.150379	70	0.0764344	1.2117	5.49485	325.823	0.87028
mat_12	Tdurum_contig13773_321	5A	606154159	2	2.91384	0.0606053	0.539242	2.01662	0.159842	2.44004	4.67846	0.0338184	74	0.0645285	1.25989	5.34893	350.656	0.87028
mat_12	RAC875_c30027_381	3A	486359667	1	3.64065	0.060608	NaN	NaN	NaN	NaN	NaN	NaN	69	0.0497805	0.996432	5.32458	322.989	0.87028
mat_12	RAC875_c12733_1509	7B	741576331	2	2.91116	0.0608445	-1.10679	5.82231	0.0183715	0.834005	0.194921	0.660175	73	0.105995	1.46763	4.96804	343.828	0.87028
mat_12	CAP11_rep_c8279_82	7A	108949134	2	2.913	0.0610214	0.402319	0.721759	0.398506	1.76611	5.05438	0.0277614	70	0.107136	1.36227	5.54701	336.265	0.87028
mat_12	wsnp_CAP11_c558_382875	6D	426115312	2	2.91302	0.0612212	-1.12747	3.98807	0.0498879	-1.85242	2.45378	0.121953	68	0.0743728	0.721011	5.47233	316.236	0.87028
mat_12	BS00066447_51	5B	580838105	2	2.90081	0.0613409	-0.317274	0.170639	0.680756	-3.57001	5.47369	0.0220431	74	0.110067	1.63693	4.93391	350.564	0.87028
mat_12	BS00109999_51	6B	679286291	2	2.9004	0.0613644	0.744587	2.36387	0.128497	-1.50316	1.79553	0.18441	74	0.0619405	0.446556	6.46689	354.428	0.87028
mat_12	BS00021718_51	2D	83854119	2	2.90053	0.0614455	0.919367	2.60567	0.110857	-2.588	5.02553	0.0280585	73	0.0699003	1.18644	5.52544	349.245	0.87028
mat_12	IAAV2411	5B	47586278	2	2.90194	0.0614566	0.998254	5.76785	0.0189419	0.583074	0.381825	0.538605	72	0.0693789	1.06751	5.71217	342.665	0.87028
mat_12	Excalibur_c34793_1260	5D	453807636	2	2.89862	0.0615546	-1.13928	4.48517	0.0376436	-2.28838	2.54409	0.115088	73	0.0703023	0.969686	5.80327	340.541	0.87028
mat_12	BobWhite_c40455_116	3B	579452731	2	2.89694	0.0615612	-0.937102	2.46721	0.120569	-4.39354	4.66772	0.0340172	74	0.0949833	1.26861	5.3483	348.375	0.87028
mat_12	BS00082180_51	7A	120176416	2	2.89824	0.0618576	-0.740028	3.27811	0.0745637	3.14829	2.67106	0.106743	70	0.0825152	1.25701	5.64769	334.401	0.87028
mat_12	wsnp_CAP11_c59_99769	3B	779542467	2	2.89099	0.0619909	0.9865	5.69022	0.0196931	0.207727	0.0396185	0.842789	73	0.0753115	0.858969	5.9233	345.752	0.87028
mat_12	BS00021658_51	6B	679286164	2	2.88862	0.0620377	-0.744101	2.35911	0.128876	-1.49925	1.78743	0.185391	74	0.0652806	0.459633	6.44766	353.657	0.87028
mat_12	BS00056737_51	3B	779577755	2	2.89155	0.0620497	1.00091	5.69514	0.01968	0.235081	0.0496326	0.824344	72	0.0694865	0.854673	6.0191	343.584	0.87028
mat_12	GENE-2947_175	4A	570264468	2	2.89308	0.0620562	0.971844	5.41753	0.0228324	-1.18467	1.00899	0.318605	71	0.076152	1.00975	5.90168	338.527	0.87028
mat_12	wsnp_Ex_rep_c70299_69243835	2A	740361007	2	2.89116	0.0620721	-0.863546	4.57043	0.0359722	1.04806	0.839625	0.362606	72	0.13713	1.61737	4.48311	336.011	0.87028
mat_12	Excalibur_c2736_159	7A	594557516	2	2.88741	0.0621073	0.263796	0.218608	0.641495	2.59853	5.75752	0.0189713	74	0.0650628	0.820649	5.91302	350.093	0.87028
mat_12	wsnp_JD_c23511_20069005	2B	44424318	2	2.88729	0.0621142	1.19155	2.23467	0.139256	2.03834	1.28521	0.260642	74	0.0821519	1.77998	4.78641	353.316	0.87028
mat_12	IAAV5370	3B	186093873	2	2.8862	0.0621773	-0.564086	1.05779	0.307116	1.60446	2.42945	0.123399	74	0.0761118	1.18147	5.44819	350.774	0.87028
mat_12	RFL_Contig2163_1769	6D	3854560	2	2.88953	0.0622598	0.854923	5.77105	0.0189484	0.195003	0.0435421	0.835314	71	0.0682584	1.04795	5.51513	333.898	0.87028
mat_12	RAC875_rep_c97032_73	6A	13075584	2	2.88931	0.0622727	0.147054	0.057788	0.81073	-3.89259	4.92007	0.0297927	71	0.108182	1.4109	5.19619	336.997	0.87028
mat_12	RAC875_c42356_237	5A	545563399	2	2.88445	0.062278	-1.82895	5.0763	0.0272599	-2.88171	3.04965	0.0849612	74	0.066971	0.971399	5.71226	352.057	0.87028
mat_12	Tdurum_contig77759_52	7A	30029928	2	2.89318	0.0623492	-1.29212	4.14291	0.0457676	-2.02656	0.532391	0.468147	68	0.0657582	0.637187	6.205	320.966	0.87028
mat_12	Kukri_c29052_75	2D	613322229	2	2.8826	0.0623852	-1.50996	5.01297	0.028206	-2.9351	2.08616	0.152918	74	0.0802168	0.805073	5.9334	351.264	0.87028
mat_12	BS00022188_51	1D	462203530	2	2.88217	0.0624097	1.09267	5.54169	0.021262	1.00287	0.757596	0.386935	74	0.0746317	1.18331	5.4475	350.475	0.87028
mat_12	BS00027006_51	1B	687720366	2	2.88185	0.0624282	-1.12158	3.70826	0.0580389	0.701865	0.542422	0.463791	74	0.0623782	0.799018	5.94569	351.149	0.87028
mat_12	BS00049977_51	3A	688688670	2	2.88492	0.0624316	0.173861	0.0896391	0.765511	2.82587	4.47129	0.037981	72	0.0891618	1.82674	4.96209	348.437	0.87028
mat_12	Excalibur_rep_c105614_172	2A	764100663	2	2.88992	0.062434	-0.273586	0.428787	0.514794	-3.10165	5.65844	0.0201858	69	0.269058	3.06636	3.87886	318.471	0.87028
mat_12	wsnp_Ex_c2236_4189774	6A	597859679	2	2.88083	0.0624871	-0.941593	2.91524	0.0919964	2.70187	3.23499	0.0762144	74	0.0625157	0.60969	6.217	351.163	0.87028
mat_12	wsnp_Ex_c10596_17293363	1B	678317711	2	2.87878	0.0627872	0.285354	0.376449	0.541471	2.36468	4.16393	0.0450133	72	0.0674443	1.22584	5.56623	342.818	0.936196
mat_12	BS00110561_51	7A	545546704	2	2.87508	0.0628214	-1.14632	3.42134	0.0684064	2.58171	4.0105	0.0489321	74	0.0598999	0.303311	6.69344	348.536	0.87028
mat_12	BobWhite_c26803_89	2B	14047014	2	2.87255	0.0630581	0.189032	0.216473	0.643144	-1.80387	5.30123	0.0242039	73	0.073173	0.757499	6.07744	343.194	0.87028
mat_12	Excalibur_c3698_739	7A	701718875	2	2.86931	0.0631581	-0.784457	4.34734	0.0405642	-1.65947	2.2479	0.138108	74	0.121417	1.79229	4.76566	351.127	0.87028
mat_12	Excalibur_rep_c71254_415	5A	567917286	2	2.86922	0.0631634	-1.17797	2.19113	0.143111	2.03975	1.29487	0.258873	74	0.0775299	1.67768	4.88827	353.441	0.87028
mat_12	RAC875_c3928_422	6A	611858373	1	3.55927	0.0632462	NaN	NaN	NaN	NaN	NaN	NaN	73	0.0512289	0.6239	6.41916	346.992	0.87028
mat_12	RAC875_c58868_397	4A	24938836	2	2.86691	0.0632991	-1.2013	5.35354	0.0234983	-0.407108	0.14497	0.704495	74	0.0869995	0.887202	5.83432	350.765	0.87028
mat_12	BobWhite_c18550_159	6A	89595496	2	2.86467	0.0634307	-0.776023	1.07155	0.304014	4.81234	5.62625	0.0203315	74	0.0961049	1.58169	5.02605	351.017	0.87028
mat_12	Kukri_c43406_2491	6B	147579800	2	2.86467	0.0634307	-0.776023	1.07155	0.304014	4.81234	5.62625	0.0203315	74	0.0961049	1.58169	5.02605	351.017	0.87028
mat_12	wsnp_Ra_c50264_54965028	7D	11671479	2	2.86467	0.0634307	-0.776023	1.07155	0.304014	4.81234	5.62625	0.0203315	74	0.0961049	1.58169	5.02605	351.017	0.87028
mat_12	Excalibur_c10689_254	1D	26296860	2	2.86594	0.0634454	0.0690309	0.0300502	0.862863	2.39851	5.7188	0.0193989	73	0.0683793	1.26146	5.40372	345.879	0.87028
mat_12	wsnp_Ex_c19214_28132186	7A	593679457	2	2.86496	0.063503	0.259447	0.208333	0.649451	2.60809	5.71136	0.019475	73	0.0659433	0.838716	5.9856	345.523	0.87028
mat_12	Kukri_c11530_92	7A	731270523	2	2.86211	0.063581	-1.09049	5.56924	0.020954	1.24641	1.07118	0.304095	74	0.0675989	1.31384	5.31157	353.306	0.87028
mat_12	wsnp_Ra_c12773_20367106	7D	232818078	2	2.86211	0.063581	-1.09049	5.56924	0.020954	1.24641	1.07118	0.304095	74	0.0675989	1.31384	5.31157	353.306	0.87028
mat_12	BS00065250_51	7A	545543360	2	2.86276	0.0636325	-1.03201	5.68408	0.0197569	-0.965567	0.778368	0.380577	73	0.063715	0.558066	6.3899	347.698	0.87028
mat_12	Excalibur_rep_c105491_144	6D	389983417	2	2.86255	0.063645	-0.476092	0.630853	0.429653	-4.72502	5.5793	0.0208806	73	0.123785	1.51635	5.184	343.903	0.87028
mat_12	wsnp_JD_c30422_23944042	3D	417741222	2	2.85626	0.0639272	0.118898	0.0887071	0.766673	-2.04321	5.49041	0.0218483	74	0.0704336	1.01454	5.67232	350.424	0.87142
mat_12	BS00024786_51	7A	79542753	2	2.85926	0.0639316	0.319823	0.656636	0.420458	-2.61807	4.73202	0.0329374	72	0.0675007	1.07775	5.76016	342.609	0.87142
mat_12	RAC875_c120509_133	1A	537355934	2	2.86647	0.0640079	0.894687	4.8594	0.0309874	-2.01269	0.499892	0.482036	67	0.0611194	7.46809e-05	7.46809	323.482	0.87142
mat_12	Kukri_c55196_445	7A	284730520	2	2.85263	0.0641429	0.349639	0.661756	0.418586	-2.94221	5.59366	0.020685	74	0.0659275	1.08648	5.58529	348.423	0.87199
mat_12	TA004358-0724	1D	407875112	2	2.85227	0.0642538	-0.700396	3.1478	0.0802571	-1.41373	1.64499	0.203756	73	0.0646998	0.763885	6.04826	348.984	0.872229
mat_12	TA005615-0600	6A	536437137	2	2.84631	0.0645195	-0.500205	0.719272	0.399155	-4.67943	5.50587	0.0216698	74	0.0740408	1.32984	5.29895	351.247	0.872534
mat_12	Kukri_c30159_573	1D	464145000	2	2.84592	0.0646331	-0.897426	5.20547	0.0254747	-0.620633	0.379619	0.539751	73	0.0618877	0.342367	6.70222	346.132	0.872534
mat_12	Kukri_c35426_507	3A	639086464	1	3.52959	0.0647002	NaN	NaN	NaN	NaN	NaN	NaN	67	0.0453103	0.81768	5.97296	317.476	0.872534
mat_12	wsnp_Ex_c293_568575	6B	710319813	2	2.84903	0.0647322	-1.15459	5.37565	0.023389	0.860796	0.194457	0.660612	70	0.0732216	0.945947	5.81151	332.332	0.872534
mat_12	Jagger_c1231_85	6B	708019294	2	2.84722	0.0647427	-1.42296	5.22362	0.0253141	0.673896	0.341875	0.560629	71	0.0659258	0.38776	6.84085	338.096	0.872534
mat_12	wsnp_Ex_c34123_42489621	6A	497789607	2	2.83915	0.0649501	-0.323869	0.717158	0.399845	-1.76116	4.00255	0.0491508	74	0.0669146	0.714835	6.07305	351.029	0.874069
mat_12	Excalibur_c10696_3390	4A	629360107	2	2.83607	0.0651359	1.47869	4.65476	0.0342589	-0.752372	0.140539	0.708833	74	0.0651421	0.691281	6.10922	348.693	0.87531
mat_12	wsnp_Ku_c4299_7814936	6A	520717537	2	2.83592	0.0652349	-0.574939	1.54051	0.218571	-1.53223	2.13052	0.148741	73	0.0625432	0.836456	5.69819	334.595	0.993914
mat_12	Tdurum_contig46828_730	6B	643165735	2	2.83211	0.0653752	-0.403573	0.823689	0.36709	3.8284	5.575	0.0208902	74	0.0825637	1.30424	5.31328	346.464	0.876009
mat_12	Tdurum_contig43566_801	6A	594988618	1	3.50066	0.0655851	NaN	NaN	NaN	NaN	NaN	NaN	70	0.0533435	0.812928	6.41258	335.871	0.877081
mat_12	Ku_c16895_793	7B	645124713	2	2.8292	0.0656427	-1.11402	4.21359	0.0437366	2.30786	3.3014	0.0733824	73	0.0660474	0.761585	5.95927	347.887	0.877081
mat_12	BS00101408_51	7B	657662487	2	2.82474	0.0659146	-0.325102	0.488608	0.486801	-1.99691	4.07553	0.0472334	73	0.0851682	1.65921	4.98454	336.248	0.877661
mat_12	BS00110010_51	7A	80861382	2	2.82248	0.0660528	-0.204102	0.165815	0.685066	-3.22232	5.60951	0.0205499	73	0.0744662	1.62397	4.86016	344.483	0.877661
mat_12	Excalibur_c13337_219	7A	81133405	2	2.82248	0.0660528	-0.204102	0.165815	0.685066	-3.22232	5.60951	0.0205499	73	0.0744662	1.62397	4.86016	344.483	0.877661
mat_12	Excalibur_c26918_75	2A	53921579	2	2.82399	0.0661495	-1.04038	4.44031	0.0386842	-2.55532	1.91327	0.170997	71	0.0795279	1.00854	5.43739	337.515	0.877661
mat_12	Ku_c57425_413	2B	108905193	2	2.82081	0.0661553	1.11477	5.09715	0.0269981	-1.82402	2.47718	0.119893	73	0.0942661	1.31153	5.34706	346.581	0.877661
mat_12	RAC875_rep_c112818_870	5A	613479932	2	2.81657	0.0663256	1.36157	5.60226	0.020591	1.10586	0.291733	0.590756	74	0.0651415	0.352448	6.62725	348.667	0.878673
mat_12	GENE-1365_255	2A	75137670	2	2.81871	0.0664733	1.03136	5.26694	0.0247359	-1.63109	1.73344	0.192267	71	0.0682056	1.13263	5.76368	338.386	0.879384
mat_12	wsnp_Ex_c7203_12370983	2B	593658430	2	2.80765	0.0668768	-0.208914	0.329475	0.567733	2.32961	4.65128	0.034324	74	0.0732399	0.81342	5.94188	347.781	0.880267
mat_12	CAP11_c1989_183	4A	629475880	2	2.80713	0.0669092	1.53064	5.06261	0.0274615	0.13972	0.006687	0.93505	74	0.0607645	0.390116	6.56266	348.615	0.880267
mat_12	RAC875_c3604_1527	1D	408241891	2	2.80998	0.0669167	0.731004	3.60217	0.06177	-1.36222	1.27696	0.262268	72	0.063292	0.464567	6.5512	341.963	0.880267
mat_12	TA001128-1276	3A	577576679	2	2.8125	0.0669554	-0.773588	4.4334	0.0388838	1.85383	1.8148	0.182341	70	0.0651631	0.873393	5.61131	322.386	0.880267
mat_12	Excalibur_c39390_303	6A	22443975	2	2.8055	0.0670106	-0.451169	0.518643	0.473721	-3.21544	3.8807	0.0526383	74	0.0710397	1.28914	5.3324	352.251	0.880267
mat_12	Kukri_c51068_528	7D	119894875	1	3.45379	0.0671947	NaN	NaN	NaN	NaN	NaN	NaN	73	0.0454202	1.20481	5.4761	345.738	0.881447
mat_12	GENE-3171_203	6B	135112676	2	2.78852	0.0680761	0.246988	0.281879	0.597084	-1.94944	4.28652	0.0419532	74	0.066425	1.57637	5.01075	351.242	0.891758
mat_12	Excalibur_c16135_253	4B	468761321	2	2.79507	0.0682501	1.075	4.95356	0.0294062	1.15198	1.51415	0.222809	68	0.073372	1.41619	5.46295	324.88	0.892788
mat_12	Excalibur_c32366_122	4A	541362821	2	2.78501	0.0683892	0.804579	5.01934	0.0281522	-1.05608	0.948266	0.333421	73	0.0592173	0.345984	6.7159	355.181	0.892845
mat_12	wsnp_Ex_c398_784427	7A	447750462	2	2.77838	0.06872	-0.872516	2.24018	0.138776	2.93583	4.40287	0.0393391	74	0.0655882	0.620998	6.2127	350.93	0.892845
mat_12	BobWhite_c23146_84	7A	448097999	2	2.77838	0.06872	-0.872516	2.24018	0.138776	2.93583	4.40287	0.0393391	74	0.0655882	0.620998	6.2127	350.93	0.892845
mat_12	BS00065932_51	3A	58045606	2	2.77599	0.0688731	-0.0839116	0.0389519	0.844092	-2.41702	5.48887	0.0218661	74	0.07133	1.51587	5.09257	347.381	0.892845
mat_12	TA005348-0816	5D	175995653	1	3.41236	0.0692619	NaN	NaN	NaN	NaN	NaN	NaN	66	0.0490134	0.899526	5.80824	312.927	0.892845
mat_12	BS00081475_51	3A	701891072	2	2.77006	0.0693454	1.63528	2.57226	0.113131	3.71345	5.53004	0.0214321	73	0.0745681	1.559	4.93969	344.341	0.892845
mat_12	CAP12_c8163_118	1A	569465990	2	2.76911	0.0694067	-1.02608	4.62158	0.0349325	1.48362	1.65642	0.20221	73	0.0649999	0.514102	6.46483	348.428	0.892845
mat_12	Kukri_c66671_183	6A	615466306	2	2.7729	0.0694537	0.727644	3.49459	0.0658135	1.23494	1.05199	0.308631	70	0.0647673	0.906339	5.82763	329.218	0.892845
mat_12	wsnp_Ex_rep_c67660_66321934	7A	567584367	2	2.76612	0.0695995	-0.566764	0.763929	0.385008	4.58243	5.38731	0.023119	73	0.0913829	1.74742	4.89561	346.01	0.892845
mat_12	BobWhite_c6966_236	5A	683353644	2	2.7635	0.069769	0.444114	1.21313	0.274382	-1.93086	3.29122	0.0738174	73	0.0639	0.89562	5.89213	345.517	0.892845
mat_12	Excalibur_c6260_536	6B	634331495	2	2.77401	0.0698117	0.810068	2.20986	0.141966	-2.09997	2.18236	0.14443	66	0.0713125	1.05204	5.72035	309.526	0.892845
mat_12	wsnp_BG314532A_Ta_2_1	2A	75139134	2	2.76569	0.0698184	1.12203	5.35744	0.0235727	-1.47478	1.58987	0.211532	71	0.0701158	1.34208	5.30233	337.962	0.892845
mat_12	Excalibur_rep_c68955_286	4A	646784216	2	2.75938	0.0701313	0.96545	3.33164	0.0721653	1.3129	0.7915	0.376651	72	0.0657777	1.22099	5.4561	342.003	0.892845
mat_12	RAC875_rep_c71350_1712	2D	79421750	2	2.75678	0.0702058	-0.839163	5.2865	0.0243948	-0.861027	0.614508	0.435667	73	0.0610426	0.294859	6.82005	353.163	0.892845
mat_12	Excalibur_c20392_1075	2D	71760963	2	2.75443	0.0702672	1.46682	2.7544	0.101277	1.24742	0.603988	0.439572	74	0.0692075	1.02449	5.67098	351.404	0.892845
mat_12	Excalibur_c11941_675	1A	23966772	2	2.75567	0.0702781	0.000462293	1.25185e-06	0.99911	2.21457	5.49814	0.0217974	73	0.101802	1.83424	4.81753	343.679	0.892845
mat_12	wsnp_Ku_c4568_8243775	3A	34524335	2	2.75515	0.070312	-1.27469	4.85099	0.0308328	-2.20555	1.44563	0.233169	73	0.0832149	2.09375	3.88579	337.219	0.892845
mat_12	RAC875_rep_c75639_706	6A	150968652	2	2.75358	0.0704147	-1.52574	5.24223	0.0249787	1.91677	2.38789	0.126663	73	0.0728607	0.861813	5.96796	346.24	0.892845
mat_12	wsnp_Ex_c1319_2522682	6D	464719587	2	2.75358	0.0704147	-1.52574	5.24223	0.0249787	1.91677	2.38789	0.126663	73	0.0728607	0.861813	5.96796	346.24	0.910599
mat_12	RAC875_c2070_566	1D	417149	2	2.75145	0.0705543	-0.939754	4.0973	0.0466625	0.609043	0.283834	0.59584	73	0.0651072	0.88247	5.9435	343.745	0.892845
mat_12	Kukri_c1468_1609	5B	65772685	2	2.75018	0.0707322	0.933676	3.93774	0.0510799	1.56377	2.27206	0.136162	72	0.072551	0.818131	6.08882	340.51	0.892845
mat_12	wsnp_Ex_c12447_19847242	1D	416456186	1	3.37219	0.0707424	NaN	NaN	NaN	NaN	NaN	NaN	68	0.0440536	0.275348	7.03606	325.964	0.892845
mat_12	BS00073116_51	5D	546864019	2	2.74751	0.0708128	1.20497	5.44752	0.0223908	1.78751	0.406317	0.525867	73	0.065969	0.849534	5.44929	332.024	0.892845
mat_12	BS00039935_51	4B	5468470	2	2.74679	0.0708605	1.26687	3.02488	0.0862703	-4.34553	4.09391	0.0467511	73	0.0709781	1.24204	5.5138	345.987	0.892845
mat_12	wsnp_Ex_c5155_9140608	5B	558625387	2	2.74676	0.0708621	-1.02514	4.81011	0.0315239	0.113079	0.00987955	0.9211	73	0.0704204	1.04142	5.74695	344.672	0.892845
mat_12	Kukri_c47825_138	1D	291086995	1	3.35776	0.0709121	NaN	NaN	NaN	NaN	NaN	NaN	75	0.0450418	0.675459	6.24549	355.652	0.892845
mat_12	BS00022534_51	4A	590208483	2	2.74327	0.0710006	-0.851024	1.63235	0.205427	2.99682	2.33078	0.131159	74	0.0940104	1.51644	5.08492	351.038	0.892845
mat_12	BS00064638_51	1A	505524352	2	2.76233	0.071054	-0.691852	3.25445	0.0761678	1.63366	2.31479	0.133316	62	0.0903982	1.58565	4.8358	291.51	0.892845
mat_12	TA005793-0515	3A	481523535	2	2.74325	0.071094	0.733217	1.41551	0.238053	-3.34235	5.12712	0.0265671	73	0.0910442	1.0615	5.73175	343.671	0.892845
mat_12	BobWhite_c11374_530	1D	7205038	2	2.74432	0.0711183	-0.228327	0.155761	0.694273	2.54738	5.45882	0.0222969	72	0.0711445	1.11194	5.73893	340.938	0.892845
mat_12	RAC875_c31791_559	7B	704671104	2	2.74067	0.071457	-0.916413	4.67697	0.033988	-1.16688	1.09062	0.299926	71	0.134876	1.80614	4.93958	338.416	0.893385
mat_12	BS00077071_51	7D	554907736	2	2.73894	0.0714739	-0.857679	5.21905	0.0253326	0.87651	0.73333	0.394687	72	0.10802	1.28048	4.90591	337.283	0.893385
mat_12	Kukri_c10016_369	5D	350999299	2	2.73577	0.0714976	-0.108761	0.0343689	0.853439	-4.60986	5.38827	0.0230675	74	0.0826987	1.74963	4.83851	350.925	0.893385
mat_12	Ex_c5594_2818	5B	520885065	2	2.73179	0.0717627	-0.040628	0.0101971	0.919842	-3.15775	5.42014	0.0226795	74	0.0634465	1.22045	5.43084	352.387	0.893385
mat_12	Excalibur_c21688_724	5D	313093228	2	2.73238	0.0718159	-1.41218	4.79567	0.0317719	-3.75837	1.65801	0.201996	73	0.0626805	0.328005	6.74598	346.622	0.893385
mat_12	Kukri_rep_c70097_286	3B	415930344	2	2.74243	0.0718735	-1.34325	4.54605	0.0367785	-1.92608	1.63244	0.205911	66	0.0777625	0.874833	5.73018	308.368	0.893385
mat_12	TA003390-0894	1B	324790666	2	2.72962	0.0719075	0.368157	0.220375	0.640154	-3.30026	5.23187	0.0250765	74	0.0620698	1.20249	5.48709	352.772	0.974811
mat_12	Kukri_rep_c69177_180	2A	12001139	2	2.73192	0.0719416	0.886988	5.24882	0.0249329	0.105205	0.0115379	0.914763	72	0.0590132	0.343177	6.51956	341.016	0.893385
mat_12	RAC875_c24098_141	7B	317766240	1	3.33129	0.0723656	NaN	NaN	NaN	NaN	NaN	NaN	69	0.081814	1.96282	4.11308	322.116	0.893385
mat_12	Excalibur_c41490_397	6D	382353449	2	2.7187	0.072642	-0.0211203	0.00134178	0.97088	-2.77792	4.88656	0.0302003	74	0.0672866	1.60461	4.98942	352.494	0.893385
mat_12	RAC875_c18446_521	7A	22918673	2	2.73012	0.0726942	0.76033	3.86499	0.0535774	-1.08004	0.964732	0.329639	66	0.099418	1.83563	4.25189	309.7	0.893385
mat_12	BS00046976_51	7A	88986974	2	2.71569	0.0728455	1.20104	4.59702	0.0353579	0.14486	0.0136793	0.907214	74	0.0728408	0.861862	5.88666	345.941	0.893385
mat_12	wsnp_Ex_c10910_17729008	6D	463446936	2	2.71564	0.0728491	-0.281807	0.315904	0.575802	-3.18949	5.42217	0.022655	74	0.0716472	1.25843	5.394	351.663	0.893385
mat_12	GENE-4153_101	6D	306711367	2	2.71439	0.0730272	1.24921	4.00456	0.0491474	-1.1414	0.483623	0.489024	73	0.13636	1.89553	4.80133	343.166	0.893385
mat_12	BS00079095_51	1D	408207012	2	2.7108	0.0732709	-0.677741	3.37258	0.0704177	-1.50483	1.21666	0.27369	73	0.0667001	0.464576	6.5488	347.073	0.893385
mat_12	Excalibur_c7338_563	7B	700830665	2	2.71062	0.073283	0.778655	4.36783	0.0401563	-1.18658	1.06014	0.30663	73	0.0671426	0.417364	6.64719	350.999	0.893385
mat_12	wsnp_CAP12_c1226_628910	6A	524833675	2	2.70546	0.0735426	-0.0534439	0.00974258	0.921643	-3.07174	4.80147	0.0316272	74	0.112894	1.48376	5.15936	348.085	0.893385
mat_12	Kukri_rep_c117022_97	3D	2625850	2	2.70787	0.0735666	-0.264512	0.485422	0.488252	-2.34303	4.93907	0.0294428	72	0.079375	1.31304	5.4862	344.048	0.893385
mat_12	BobWhite_c44460_821	1D	200877951	2	2.70611	0.0735912	-0.916758	5.10092	0.0269436	-0.186988	0.0353469	0.851399	73	0.0616334	0.404908	6.47642	348.276	0.893385
mat_12	Kukri_c7119_392	1D	444364516	2	2.70389	0.0736504	-0.765517	3.94498	0.0507664	-0.818063	0.631001	0.429563	74	0.059769	0.110684	7.06508	352.539	0.893385
mat_12	wsnp_Ex_c14953_23104041	2A	728758430	2	2.70285	0.0737219	-0.470988	1.26	0.265329	-2.1201	4.98452	0.0286422	74	0.0702566	1.41424	5.26849	350.054	0.893385
mat_12	Excalibur_c60581_62	3A	639024918	2	2.7034	0.0737772	1.049	5.3603	0.0234537	-0.192681	0.0330824	0.856184	73	0.066723	1.08502	5.64656	345.379	0.893385
mat_12	BS00060042_51	1D	339306672	2	2.70288	0.0738127	-1.46686	5.37775	0.0232369	0.791275	0.0769849	0.782221	73	0.0553706	0.0452369	7.19775	346.509	0.893385
mat_12	wsnp_Ex_c10555_17236072	2A	760565967	2	2.70848	0.0738285	1.88877	3.5036	0.065537	3.17265	5.26695	0.0248257	69	0.101175	1.91149	4.73543	327.192	0.893385
mat_12	Excalibur_c6154_413	6A	233345753	2	2.70222	0.073858	-1.80582	3.03023	0.0859981	0.443572	0.0800711	0.778013	73	0.0700179	1.41491	5.31408	347.582	0.893385
mat_12	BS00015015_51	5B	621263130	2	2.70156	0.0740977	-0.827405	4.25925	0.0427461	1.73875	2.13449	0.148493	71	0.0662231	0.601742	6.47753	338.189	0.893385
mat_12	D_GBF1XID01DNWRS_378	1D	407808667	2	2.70025	0.0741876	-0.708659	3.35311	0.0713338	-1.45056	1.07752	0.302826	71	0.0683985	0.399526	6.82896	338.487	0.893385
mat_12	RAC875_c17720_436	2B	47181315	2	2.70758	0.0742223	0.612615	2.636	0.109307	2.79924	3.0062	0.0876877	66	0.068243	0.979038	5.66406	312.677	0.893385
mat_12	Kukri_c33640_640	3A	638983427	2	2.69342	0.0744655	-1.05366	5.34512	0.0236442	-0.176208	0.0277207	0.868234	73	0.0643162	1.17997	5.55857	344.445	0.893385
mat_12	CAP7_c1274_206	5B	618475643	2	2.6922	0.0745498	0.812291	5.18394	0.0257701	0.70884	0.408682	0.524668	73	0.0611605	0.285777	6.86821	350.782	0.893385
mat_12	wsnp_Ku_rep_c72821_72480395	3B	579890082	2	2.69104	0.0746301	1.20901	3.65873	0.0597538	-3.21036	3.39422	0.0695428	73	0.0688745	0.851701	6.00742	346.323	0.893385
mat_12	RAC875_c13116_541	2A	74961050	2	2.69466	0.0746753	0.982279	4.86093	0.030808	-1.63784	1.90403	0.172083	70	0.0774134	1.09987	5.69078	333.584	0.893385
mat_12	BobWhite_c20558_374	7D	5199334	2	2.69125	0.074712	-0.595587	1.98584	0.163142	-2.24221	3.70138	0.0583767	72	0.0794307	1.16959	5.58847	342.335	0.893385
mat_12	Ex_c9556_2547	7A	514822395	2	2.68926	0.0747543	-0.677954	1.91025	0.171208	1.44409	2.29347	0.134297	73	0.0678611	1.00376	5.81052	342.401	0.893385
mat_12	wsnp_Ex_rep_c105174_89674370	7A	447500374	2	2.68685	0.0749218	0.855816	2.09794	0.151838	2.91878	4.30921	0.0414785	73	0.0696812	0.732772	6.18809	346.087	0.893385
mat_12	RFL_Contig5693_646	6B	40456216	2	2.69015	0.0749889	-1.26182	2.95323	0.0901902	3.33893	4.31047	0.0416062	70	0.0748824	1.31486	5.03661	328.352	0.893385
mat_12	BS00074617_51	3A	620212037	1	3.27116	0.0749951	NaN	NaN	NaN	NaN	NaN	NaN	68	0.0534223	1.30571	5.66752	325.235	0.893385
mat_12	RAC875_c21537_368	7B	639382366	2	2.68564	0.075006	1.19288	2.87375	0.094356	1.77312	1.02232	0.315355	73	0.0703524	1.34207	5.37304	345.84	0.893385
mat_12	Kukri_c19751_873	2B	594172387	2	2.68548	0.0750173	-0.023044	0.00427487	0.948051	2.59365	5.30946	0.0240979	73	0.0600814	0.708209	6.19609	342.835	0.893385
mat_12	wsnp_Ex_c6065_10623213	3B	79128802	2	2.69241	0.0751547	-0.19484	0.265627	0.608002	-3.99915	4.98633	0.0289447	67	0.10229	1.52965	4.59216	315.731	0.893385
mat_12	RAC875_c13116_1162	2A	74960338	2	2.68263	0.0753129	-0.942867	4.64012	0.0346281	0.301496	0.0770847	0.782095	72	0.0661118	0.825533	5.7692	339.095	0.893385
mat_12	wsnp_JD_c3839_4902725	6A	520922039	2	2.67844	0.0754171	0.0231572	0.00198024	0.964627	-3.08855	4.86464	0.0305612	74	0.102079	1.40888	5.24659	349.965	0.893385
mat_12	Kukri_c36018_985	5B	612982069	2	2.67848	0.0756043	-0.82173	5.26322	0.0247419	0.702352	0.323394	0.571369	72	0.0591975	0.332598	6.68202	344.707	0.893385
mat_12	RAC875_c3835_782	1B	548536054	2	2.6756	0.0756165	1.34962	0.918366	0.341068	-1.56794	0.654909	0.420993	74	0.0622595	1.09837	5.59342	346.559	0.893385
mat_12	Ex_c402_1223	1B	548623111	2	2.6756	0.0756165	1.34962	0.918366	0.341068	-1.56794	0.654909	0.420993	74	0.0622595	1.09837	5.59342	346.559	0.893385
mat_12	Ku_c4348_862	1B	548674763	2	2.6756	0.0756165	1.34962	0.918366	0.341068	-1.56794	0.654909	0.420993	74	0.0622595	1.09837	5.59342	346.559	0.893385
mat_12	GENE-4898_208	7A	572868964	2	2.67645	0.0756507	-0.483077	0.610053	0.437328	4.52111	5.25107	0.0248609	73	0.0915019	1.74373	4.92177	346.25	0.893385
mat_12	BS00023069_51	7B	743622764	2	2.66733	0.0762015	0.921174	4.85161	0.030778	0.282137	0.089015	0.766281	74	0.0750849	0.46267	6.4856	352.107	0.896715
mat_12	BS00105846_51	1B	15284478	2	2.66772	0.0762678	-0.892797	3.20429	0.0776499	-2.37025	3.82811	0.0542785	73	0.0591285	0.747535	6.12385	345.483	0.896715
mat_12	RFL_Contig3607_648	7D	634095962	2	2.66707	0.0763141	-0.0174759	0.0010293	0.974495	4.4847	4.95054	0.0292164	73	0.0641455	1.38015	5.3341	346.344	0.896715
mat_12	Kukri_rep_c70839_205	5A	563843071	2	2.66572	0.0763162	-0.918133	3.8524	0.0534859	-1.48675	2.51756	0.116907	74	0.0799847	1.25689	5.40638	349.918	0.896715
mat_12	IACX11047	1B	532163293	2	2.6638	0.076743	-0.802473	4.47695	0.0379139	-1.02866	0.856575	0.357879	71	0.0586653	0.343872	6.92532	338.811	0.900003
mat_12	BS00106932_51	3A	654315185	2	2.65493	0.0770875	-1.6077	3.44968	0.0672977	0.662903	0.168535	0.68262	74	0.0614913	1.15227	5.52599	351.213	0.900003
mat_12	BS00108062_51	5B	396630484	2	2.65195	0.077302	0.909586	4.4101	0.0391825	-0.502502	0.351633	0.555023	74	0.0617457	0.714794	6.10784	348.002	0.900003
mat_12	wsnp_BE444144D_Ta_1_1	2D	80730867	2	2.6511	0.0773634	-1.14421	3.33419	0.0719433	-2.38658	3.77592	0.0558512	74	0.077826	1.26212	5.39399	350.911	0.900003
mat_12	BS00080239_51	2D	82185627	2	2.6511	0.0773634	-1.14421	3.33419	0.0719433	-2.38658	3.77592	0.0558512	74	0.077826	1.26212	5.39399	350.911	0.900003
mat_12	BS00064703_51	3D	519249918	2	2.64681	0.0776735	1.59799	3.42832	0.0681315	0.665648	0.169323	0.681919	74	0.0661424	1.09564	5.60654	350.839	0.900003
mat_12	Excalibur_c1208_72	5A	502219443	2	2.64601	0.0777314	0.668907	3.54928	0.0635537	-1.0346	1.27144	0.263189	74	0.0692145	1.00047	5.73402	355.808	0.900003
mat_12	TA001366-0072	2D	81312850	1	3.19169	0.0781654	NaN	NaN	NaN	NaN	NaN	NaN	74	0.054825	1.20238	5.35511	349.305	0.900003
mat_12	BobWhite_c33344_143	3B	736673173	2	2.63848	0.0784705	-0.565484	1.06289	0.306057	3.53322	3.50446	0.0653228	72	0.0906527	1.52376	4.91655	338.493	0.900003
mat_12	wsnp_Ex_c8741_14630167	6A	522618561	2	2.63539	0.0785052	0.017566	0.00107295	0.973959	-3.07713	4.75358	0.0324617	74	0.0759725	1.24742	5.4157	351.205	0.900003
mat_12	wsnp_JD_rep_c48797_33040150	6A	522618602	2	2.63539	0.0785052	0.017566	0.00107295	0.973959	-3.07713	4.75358	0.0324617	74	0.0759725	1.24742	5.4157	351.205	0.900003
mat_12	BS00021976_51	3A	168837275	2	2.63451	0.0785692	-0.278603	0.136891	0.712462	2.69534	3.55154	0.0634712	74	0.0619661	1.19607	5.47905	358.592	0.900003
mat_12	Kukri_c25451_119	7A	670959708	2	2.63794	0.0786095	1.04741	4.12521	0.0460479	2.12168	2.717	0.103766	71	0.0636153	0.829798	6.20174	338.673	0.900003
mat_12	BS00033442_51	7A	125715658	2	2.63298	0.0787759	-0.685038	2.9719	0.0890141	-1.27902	1.50266	0.224257	73	0.0629407	1.18209	5.54406	345.047	0.900003
mat_12	BS00033372_51	3B	564760272	2	2.63575	0.0788728	-0.926288	3.89385	0.0524698	-1.64258	1.93835	0.168319	70	0.0619583	0.307078	7.03192	337.096	0.900003
mat_12	BobWhite_c5235_710	7A	644117750	2	2.62969	0.0789232	-0.519489	1.00446	0.319543	-2.7765	5.16704	0.025963	74	0.06448	0.934418	5.81975	351.126	0.900003
mat_12	TA003709-0269	5A	621759552	2	2.62712	0.0791125	0.813883	5.13822	0.0263676	0.542679	0.283494	0.596037	74	0.055788	0.374141	6.62144	351.406	0.900003
mat_12	Tdurum_contig62286_271	4B	645298547	2	2.6278	0.0791574	0.256593	0.345543	0.558487	2.60846	5.22411	0.0252218	73	0.062445	1.12956	5.67122	347.992	0.900003
mat_12	wsnp_Ex_rep_c70036_68988728	7B	129654615	2	2.62594	0.0793919	0.499578	1.83116	0.180283	-1.66276	3.0513	0.084997	72	0.0641021	0.347431	6.54493	338.555	0.900003
mat_12	BS00023074_51	3B	140427041	2	2.63005	0.0793974	-1.35302	5.04219	0.0279915	-0.965559	0.630072	0.43009	69	0.0680403	0.303555	7.0493	330.844	0.900003
mat_12	Kukri_c8913_655	3D	512675071	2	2.62176	0.0795093	1.31773	4.98124	0.028693	-0.425437	0.0812498	0.776418	74	0.0581353	0.592991	6.29544	350.444	0.900003
mat_12	wsnp_Ex_c27290_36498531	1D	408072686	2	2.62175	0.0795099	0.70086	3.34104	0.0716581	-1.09088	1.01246	0.317639	74	0.06247	0.508701	6.41156	360.418	0.900003
mat_12	IAAV7745	1D	408078290	2	2.62175	0.0795099	0.70086	3.34104	0.0716581	-1.09088	1.01246	0.317639	74	0.06247	0.508701	6.41156	360.418	0.900003
mat_12	Excalibur_c19237_895	1D	408207683	2	2.62175	0.0795099	0.70086	3.34104	0.0716581	-1.09088	1.01246	0.317639	74	0.06247	0.508701	6.41156	360.418	0.900003
mat_12	wsnp_JD_c8173_9207415	1D	408245542	2	2.62175	0.0795099	0.70086	3.34104	0.0716581	-1.09088	1.01246	0.317639	74	0.06247	0.508701	6.41156	360.418	0.900003
mat_12	RAC875_c390_1494	4A	631574932	2	2.62145	0.0795324	-1.80137	5.23588	0.0250227	1.4263	0.252823	0.616608	74	0.0562207	0.506198	6.41437	353.407	0.900003
mat_12	Excalibur_c18182_464	6B	201222677	2	2.62315	0.0795986	1.06468	4.83387	0.0311661	0.0513203	0.00170903	0.967141	72	0.0576143	0.305999	6.87372	342.221	0.900003
mat_12	RAC875_c14085_1709	4D	482773914	1	3.19113	0.0796535	NaN	NaN	NaN	NaN	NaN	NaN	55	0.0719275	1.86432	5.09915	262.361	0.900003
mat_12	wsnp_BE445113A_Ta_2_2	1A	501031063	2	2.62188	0.0796925	0.845407	5.12576	0.0266297	0.328364	0.112672	0.738113	72	0.0626499	0.94724	5.94923	335.173	0.900003
mat_12	wsnp_Ex_c19430_28378386	6A	1497257	2	2.61537	0.0800796	0.376723	1.06911	0.304607	-2.07925	4.06873	0.0474134	73	0.0854628	1.70079	5.08208	346.913	0.900003
mat_12	GENE-3659_104	6B	159699782	2	2.61333	0.0801371	0.589559	1.71659	0.19424	-3.79992	3.19786	0.0778842	74	0.104286	1.58828	5.04097	345.072	0.900003
mat_12	RFL_Contig2578_862	3B	779535677	2	2.62126	0.0801577	0.917548	4.76283	0.0325908	1.05315	0.347464	0.557535	68	0.0718799	1.0902	5.81364	322.981	0.900003
mat_12	IAAV614	1A	41709776	1	3.14838	0.0801718	NaN	NaN	NaN	NaN	NaN	NaN	74	0.0357202	0.714665	6.30814	352.702	0.900003
mat_12	Tdurum_contig82510_574	UN	82513755	2	2.61364	0.0802092	0.808395	2.41052	0.124907	-3.14887	4.0144	0.048877	73	0.0725216	1.06834	5.57845	346.473	0.900003
mat_12	BS00022851_51	1B	619687904	2	2.61492	0.0802108	-0.450967	1.3123	0.255825	2.17077	4.3745	0.0400589	72	0.0969215	1.76247	4.34583	337.446	0.900003
mat_12	Kukri_c1313_1158	1A	513661810	2	2.6111	0.0804972	-0.787661	4.05123	0.0479325	0.81167	0.512487	0.476412	72	0.0627469	1.24144	5.38983	337.729	0.900003
mat_12	RAC875_c64377_732	2D	570958181	2	2.61211	0.0805214	0.915257	4.92274	0.0297498	-0.214778	0.0429431	0.836434	71	0.0578968	0.455283	6.58474	338.141	0.900003
mat_12	RFL_Contig2531_1872	5B	445179344	2	2.61158	0.0805615	-0.329079	0.559323	0.457038	-2.47765	4.05629	0.0478518	71	0.0716121	1.10239	5.70003	335.303	0.900003
mat_12	Tdurum_contig57153_1356	1B	661517101	2	2.61439	0.0807824	0.881314	5.21173	0.0256632	-0.327725	0.0769903	0.782286	67	0.0676296	0.796691	5.01035	307.098	0.900003
mat_12	BS00012014_51	2A	764089631	2	2.6414	0.080995	0.115131	0.0375011	0.847218	-2.83741	5.06909	0.0286929	52	0.0914844	0.138643	6.20043	240.813	0.900003
mat_12	Tdurum_contig47622_234	4B	13411231	2	2.60114	0.0811496	-0.62298	2.33177	0.131139	1.67105	3.54091	0.0639149	73	0.0667768	1.2296	5.52218	343.922	0.900003
mat_12	Kukri_c67076_479	7A	264847349	2	2.60111	0.0811517	-0.350255	0.658022	0.419933	-2.98905	5.02349	0.0280893	73	0.0647926	1.06266	5.69637	347.518	0.900003
mat_12	Ku_c5960_496	1B	112203108	2	2.60174	0.0812017	0.808029	3.32825	0.0723068	0.962378	0.760474	0.38612	72	0.0859732	0.904788	6.01524	343.646	0.900003
mat_12	Kukri_c29410_63	5B	560397106	2	2.59884	0.0812287	-0.914604	4.18314	0.0444326	0.4262	0.136371	0.712985	74	0.0654709	0.914437	5.8639	351.102	0.900003
mat_12	JD_c49225_324	3A	568383330	2	2.60169	0.0813062	0.84287	3.60334	0.0617869	-1.46833	1.96063	0.165863	71	0.0608931	0.497918	6.58483	340.339	0.900003
mat_12	wsnp_Ex_rep_c70299_69243401	2A	740361440	2	2.5976	0.081516	0.859917	4.22453	0.0435231	0.902526	0.69163	0.408399	72	0.0743983	0.841742	6.09484	343.087	0.900003
mat_12	BS00039218_51	3B	18025991	2	2.61069	0.0815477	0.162553	0.138784	0.710764	-2.13471	5.17585	0.026372	63	0.0681375	0.869466	5.30143	291.967	0.900003
mat_12	wsnp_Ra_c407_862316	2B	53464864	2	2.60211	0.0815944	-0.806503	4.07294	0.047582	-1.03648	1.09006	0.30021	68	0.110477	2.04595	4.1933	321.432	0.900003
mat_12	Tdurum_contig10048_207	2B	779341469	2	2.59777	0.0816037	1.04057	2.1108	0.150731	-1.80063	1.73721	0.191789	71	0.0688962	0.747981	6.27786	337.858	0.900003
mat_12	BS00010131_51	1D	391741949	2	2.59508	0.0816092	-0.869152	4.71679	0.0331644	0.481184	0.133921	0.715474	73	0.0804533	0.562369	6.42115	346.532	0.900003
mat_12	IAAV4945	7A	80075996	2	2.59507	0.0816102	0.547078	0.932307	0.337496	-3.06702	5.11416	0.0267526	73	0.0653278	1.40928	5.14372	344.46	0.900003
mat_12	RFL_Contig5262_1500	6A	609035756	2	2.59183	0.081762	-0.986206	4.13455	0.0456523	1.21359	1.88831	0.173597	74	0.0609058	0.957208	5.78327	349.707	0.900003
mat_12	RAC875_c21411_162	1D	444335818	2	2.59289	0.081776	-0.926678	5.18556	0.0257478	0.566974	0.400909	0.528626	73	0.0614348	0.898197	5.38925	340.146	0.900003
mat_12	Tdurum_contig10036_1044	6B	356795743	2	2.59268	0.0817922	0.884608	5.03668	0.0278905	-0.265662	0.0710884	0.790521	73	0.0591238	0.337899	6.76034	349.52	0.900003
mat_12	wsnp_Ex_c1358_2600929	1D	8605231	2	2.58871	0.0820959	0.302547	0.413479	0.522252	1.73768	4.09606	0.0466951	73	0.0658065	1.45313	5.23973	347.44	0.900167
mat_12	wsnp_Ex_c1358_2602235	1D	8606537	2	2.58871	0.0820959	0.302547	0.413479	0.522252	1.73768	4.09606	0.0466951	73	0.0658065	1.45313	5.23973	347.44	0.900167
mat_12	Kukri_c837_436	1D	8609789	2	2.58871	0.0820959	0.302547	0.413479	0.522252	1.73768	4.09606	0.0466951	73	0.0658065	1.45313	5.23973	347.44	0.900167
mat_12	BS00068327_51	1B	634415667	2	2.58975	0.0824254	-0.722818	3.13581	0.0810718	-3.43316	2.71573	0.103977	69	0.0678536	1.04449	5.70818	326.072	0.902723
mat_12	RAC875_c8752_1079	6D	262430713	2	2.58127	0.0826675	0.965613	5.15774	0.0261345	0.337176	0.0575514	0.81109	73	0.0725091	1.44726	5.10396	343.188	0.904194
mat_12	BobWhite_rep_c66630_331	7B	624351187	2	2.58164	0.0829422	0.972333	3.80406	0.0551917	2.14333	2.82407	0.0973826	70	0.0626511	0.918538	5.41258	330.087	0.904194
mat_12	BS00022206_51	7D	58868393	1	3.08874	0.0830282	NaN	NaN	NaN	NaN	NaN	NaN	74	0.0371023	1.11391	5.75424	353.189	0.904194
mat_12	RFL_Contig1323_544	7D	10835043	2	2.57606	0.0831687	-0.955035	4.94732	0.029312	-0.0292807	0.000715287	0.978738	72	0.0583149	0.397179	6.80206	343.928	0.904194
mat_12	wsnp_Ex_c1319_2522992	6B	226865892	2	2.57328	0.0832863	1.30546	1.63891	0.204585	4.25559	5.11313	0.0267675	73	0.063603	1.33968	5.39717	342.252	0.904194
mat_12	RAC875_rep_c114924_726	5A	104240464	2	2.58245	0.0835721	-0.254589	0.252469	0.617094	2.67577	4.31438	0.0418746	64	0.0909437	2.37041	3.98872	294.548	0.904194
mat_12	BS00110281_51	4A	733639091	2	2.60915	0.0835942	-0.182224	0.192234	0.662953	-3.16153	4.78807	0.0333577	51	0.0880051	7.24301e-05	7.24301	243.801	0.904194
mat_12	wsnp_Ex_c45348_51169164	3D	398402824	2	2.56615	0.083747	-1.04525	4.3661	0.0401458	0.260457	0.0593884	0.808149	74	0.0707651	0.959403	5.79818	350.821	0.904194
mat_12	wsnp_Ku_c2614_4970880	6B	226865994	2	2.56615	0.083747	-1.04525	4.3661	0.0401458	0.260457	0.0593884	0.808149	74	0.0707651	0.959403	5.79818	350.821	0.904194
mat_12	BobWhite_rep_c58252_112	7A	54990947	2	2.56602	0.0837567	-0.25323	0.1154	0.735054	-2.49838	3.3119	0.0728794	74	0.0675855	1.28326	5.40491	350.636	0.904194
mat_12	Tdurum_contig50062_934	6D	25665340	2	2.56469	0.0838606	0.548161	0.869773	0.354093	-3.01623	5.06972	0.0273566	74	0.0623486	1.10812	5.60037	351.145	0.904194
mat_12	BobWhite_c24259_117	7A	447500424	2	2.56476	0.0840496	-0.89234	2.28852	0.134773	3.07052	3.90246	0.0521035	72	0.0579459	0.562575	6.48833	344.161	0.904194
mat_12	IAAV4105	5D	450206472	2	2.56332	0.0841629	-0.806884	3.5949	0.0620267	1.5669	2.46814	0.120621	72	0.0689588	0.89435	6.00371	342.804	0.904194
mat_12	BobWhite_c43731_313	5D	540347126	2	2.56025	0.0842096	-1.10067	3.46685	0.0666353	-0.38181	0.104209	0.747759	74	0.0799391	1.27321	5.44429	351.171	0.904194
mat_12	BobWhite_c5419_861	6D	310392263	1	3.06051	0.0844191	NaN	NaN	NaN	NaN	NaN	NaN	74	0.0368818	0.796149	6.18568	353.621	0.904194
mat_12	IAAV6170	7A	538784257	2	2.55541	0.0848877	-0.775972	2.62037	0.109997	1.35127	1.74095	0.191318	71	0.0606109	0.777742	6.29196	339.856	0.904194
mat_12	wsnp_Ku_c56140_59771244	5D	540833502	2	2.55273	0.0848995	0.133102	0.0936407	0.760482	2.16166	5.01223	0.0282602	73	0.099596	1.45555	5.27843	347.38	0.972651
mat_12	Ex_c5740_1133	2A	740848533	2	2.54983	0.0850336	0.926333	4.812	0.0314468	-0.598672	0.400193	0.528966	74	0.0865325	1.3002	5.37134	353.386	0.904194
mat_12	Ku_c37893_495	3D	67726871	1	3.04486	0.0851446	NaN	NaN	NaN	NaN	NaN	NaN	75	0.0410006	0.877849	5.99331	355.99	0.904194
mat_12	wsnp_Ex_c539_1072859	4A	597688011	2	2.54745	0.085223	0.888843	4.91356	0.0297621	1.00094	1.06241	0.30607	74	0.0577217	0.933608	5.86269	351.879	0.904194
mat_12	BS00021911_51	5A	556684536	2	2.54946	0.0852577	0.225804	0.23513	0.629239	-2.13914	4.79876	0.031765	72	0.0685548	1.06761	5.61529	341.934	0.904194
mat_12	BS00022332_51	2A	40823054	2	2.54428	0.0854756	-0.382596	0.259602	0.611931	4.38081	5.05767	0.0275347	74	0.0618816	1.23352	5.44917	351.98	0.904194
mat_12	BS00065128_51	5B	582582306	2	2.54433	0.0855684	0.265631	0.441206	0.508662	-2.18016	4.86593	0.0305843	73	0.0593222	1.25233	5.49932	346.383	0.904194
mat_12	wsnp_Ku_c2637_5009091	6D	6343094	2	2.54337	0.0856446	0.193611	0.192575	0.662096	-3.27026	5.0852	0.027172	73	0.0745072	1.03108	5.78095	345.378	0.904194
mat_12	wsnp_JD_c30_49073	2A	762289196	2	2.54329	0.0856513	0.337766	0.395881	0.531215	-3.41617	5.08386	0.0271917	73	0.0630598	1.35267	5.19054	344.638	0.904194
mat_12	GENE-1355_130	2D	621845088	2	2.54168	0.0857803	0.540156	0.814769	0.369724	2.7035	5.08031	0.0272436	73	0.0778728	1.74002	4.56531	343.82	0.904194
mat_12	Excalibur_c21739_688	7D	573694449	2	2.53934	0.0859678	-0.495146	0.761768	0.385677	-3.21106	5.04147	0.0278187	73	0.0698302	1.19743	5.59516	345.489	0.904194
mat_12	Tdurum_contig99020_139	7B	682378646	1	3.03438	0.0859735	NaN	NaN	NaN	NaN	NaN	NaN	70	0.050158	1.47159	4.61433	327.066	0.904194
mat_12	RAC875_rep_c106371_205	5D	464067336	2	2.5379	0.0859876	-0.556095	0.896755	0.346778	-3.00902	5.00756	0.0282884	74	0.0574432	1.04522	5.70099	355.611	0.904194
mat_12	wsnp_Ex_c48257_53217539	5B	326573445	2	2.53855	0.0860315	0.669748	2.09883	0.151753	1.67349	1.69952	0.196504	73	0.0945783	1.18271	5.6224	341.843	0.904194
mat_12	Kukri_c19802_710	6A	554821918	2	2.54046	0.086079	-0.737946	2.75673	0.101319	2.2766	3.6621	0.0597531	71	0.0805057	1.26216	5.20304	332.126	0.904194
mat_12	IAAV942	7A	570182518	2	2.53662	0.0860905	0.338341	0.335959	0.563955	4.42018	5.05368	0.0275939	74	0.0719295	1.68303	4.94041	352.821	0.904194
mat_12	Kukri_c498_1817	2A	762289246	2	2.53742	0.086122	-0.336916	0.394137	0.532119	-3.41399	5.07217	0.0273631	73	0.0639974	1.34058	5.20538	345.735	0.904194
mat_12	RAC875_c55347_506	6B	122967790	2	2.53559	0.0862692	-0.744274	3.01012	0.0870248	-1.41068	2.19889	0.142474	73	0.0607273	0.973012	5.86577	344.388	0.904194
mat_12	BS00022902_51	1B	67540726	2	2.53374	0.0863224	-0.555316	1.77233	0.187237	-1.80366	3.56673	0.0629214	74	0.0646264	1.14238	5.55836	351.502	0.904194
mat_12	IACX1891	1B	615126738	2	2.53261	0.0864135	-0.126238	0.0883064	0.767185	2.12321	4.94689	0.0292305	74	0.0784904	1.31444	5.35179	350.264	0.904194
mat_12	Tdurum_contig10036_1614	1B	640157709	2	2.5325	0.0864227	0.872924	4.97084	0.0288546	-0.231474	0.0558187	0.813893	74	0.0562672	0.487849	6.47248	348.236	0.904194
mat_12	wsnp_BE590634B_Ta_2_1	1B	615126626	2	2.5325	0.0864227	0.12605	0.0879867	0.767595	2.12364	4.94711	0.029227	74	0.0623838	1.31765	5.3513	345.613	0.904194
mat_12	Excalibur_c8931_432	3D	345716746	2	2.53169	0.0865845	-1.01964	3.50417	0.0652762	2.40934	3.15557	0.079893	73	0.0598694	0.701724	6.24668	345.655	0.904194
mat_12	Tdurum_contig10036_741	1B	640162601	2	2.53361	0.08663	-0.793895	4.02059	0.0488159	-0.996787	0.952761	0.332379	71	0.0608656	0.803557	5.68949	321.327	0.914044
mat_12	wsnp_Ex_rep_c67543_66165372	2B	45787116	2	2.53064	0.0866698	0.146607	0.165291	0.685537	2.27911	4.57125	0.0359075	73	0.0807575	0.881302	5.97973	345.083	0.904194
mat_12	TA003097-1351	6D	465100884	2	2.53005	0.086717	1.75299	4.41269	0.0391751	-4.04545	1.86723	0.176045	73	0.0572852	0.513463	6.51923	347.16	0.904194
mat_12	Ku_c23960_333	1A	438366049	2	2.53305	0.0867802	-0.921454	4.85161	0.0309636	0.428353	0.225821	0.636141	70	0.0553603	0.693518	5.70594	325.998	0.904194
mat_12	BS00086050_51	3A	739147133	2	2.52767	0.0868134	0.0935556	0.0703436	0.791585	-1.91554	4.99328	0.0285071	74	0.0565475	1.18251	5.52435	352.346	0.904194
mat_12	BS00021860_51	5A	704973863	2	2.53162	0.0870037	1.46191	4.4177	0.0392749	-2.93466	2.30238	0.133811	69	0.073052	0.799506	6.28893	325.579	0.904852
mat_12	Kukri_c16557_855	2D	76007905	2	2.5308	0.0870702	0.933142	4.60999	0.035355	-1.50997	1.08933	0.300315	69	0.0691563	1.2015	5.25424	323.511	0.904852
mat_12	BobWhite_c38408_71	5B	658454335	2	2.52205	0.087467	-1.05583	4.97746	0.0288396	0.615834	0.255567	0.614748	72	0.0541803	0.222323	7.06261	345.297	0.907623
mat_12	Ku_c12139_1714	7A	127834101	2	2.52441	0.08759	-0.243368	0.388659	0.535091	-3.36302	4.37648	0.0401744	69	0.0719793	1.57444	5.13493	319.782	0.907623
mat_12	Ku_c1313_1673	1A	513662325	2	2.52394	0.0876279	0.90321	4.99486	0.0287115	-0.0872321	0.00525329	0.942433	69	0.0807341	0.877766	6.20498	329.854	0.907623
mat_12	RAC875_c278_1801	5B	683143120	2	2.51853	0.0877551	-0.994	4.07439	0.0473165	1.61747	2.67292	0.106495	72	0.0949921	1.63878	5.08778	344.08	0.907935
mat_12	CAP11_c7700_247	5B	682183439	2	2.51431	0.0881013	0.523765	1.83509	0.179822	-1.75145	3.15294	0.0800756	72	0.0589674	1.15482	5.72627	344.199	0.908637
mat_12	Excalibur_c8188_243	1D	410467953	2	2.5147	0.088172	0.680189	2.94946	0.0903275	-1.39743	1.21541	0.274039	71	0.0583216	0.386593	6.87359	340.615	0.908637
mat_12	wsnp_Ex_c4069_7355431	3B	64702494	2	2.51606	0.0882736	-0.815444	4.03739	0.0484737	0.963139	0.647657	0.423756	69	0.0666576	1.18503	5.30648	323.718	0.908637
mat_12	BS00033795_51	6A	402473488	2	2.50634	0.0885636	-1.25826	2.77117	0.100263	3.65992	3.59674	0.06185	74	0.0715976	1.28527	5.39152	349.59	0.908637
mat_12	BS00086046_51	6A	425277706	2	2.50634	0.0885636	-1.25826	2.77117	0.100263	3.65992	3.59674	0.06185	74	0.0715976	1.28527	5.39152	349.59	0.908637
mat_12	wsnp_Ex_c1104_2118684	6A	431221955	2	2.50634	0.0885636	-1.25826	2.77117	0.100263	3.65992	3.59674	0.06185	74	0.0715976	1.28527	5.39152	349.59	0.908637
mat_12	Kukri_c38882_391	6A	433970918	2	2.50634	0.0885636	-1.25826	2.77117	0.100263	3.65992	3.59674	0.06185	74	0.0715976	1.28527	5.39152	349.59	0.908637
mat_12	BobWhite_c23617_167	1B	645571327	2	2.50827	0.0886001	-0.345466	0.694036	0.407589	-2.33406	4.50785	0.0372266	72	0.0605304	0.528371	6.27377	339.492	0.908637
mat_12	BobWhite_c33506_732	1B	480820956	2	2.5041	0.0887493	0.908558	1.8973	0.17259	2.70988	4.80174	0.0316226	74	0.0565592	1.29341	5.38891	351.743	0.909168
mat_12	wsnp_BE494527B_Ta_2_1	1B	622467061	2	2.51951	0.0888463	0.477398	1.31325	0.256283	2.54153	3.62384	0.0616777	62	0.102705	1.47915	4.58923	293.094	0.909168
mat_12	wsnp_BE590634B_Ta_2_5	1B	615126738	2	2.50247	0.0889818	-0.1354	0.0966442	0.756793	2.1514	4.9067	0.0299167	73	0.0717033	1.39927	5.40553	344.516	0.909403
mat_12	Excalibur_c4799_338	6D	344175243	2	2.51524	0.0890637	-0.807692	3.00289	0.088088	2.06625	3.63371	0.0612583	63	0.0666997	0.167211	6.54281	294.654	0.909403
mat_12	RAC875_c8088_61	1B	565671145	2	2.49978	0.0893056	0.481716	1.29535	0.258891	-1.39024	2.81593	0.09773	72	0.0641548	1.01581	5.91986	344.299	0.909637
mat_12	RAC875_rep_c108908_72	2A	74967867	2	2.49824	0.0894338	-0.987329	4.99641	0.0285465	-0.573042	0.227228	0.635051	72	0.0580227	1.19869	5.07284	337.606	0.909637
mat_12	BS00081506_51	2A	718730480	2	2.49676	0.0894584	-0.0790234	0.0303498	0.862188	2.25512	4.5026	0.037285	73	0.0921072	1.36603	5.3912	342.107	0.909637
mat_12	Tdurum_contig9731_121	2A	74164456	2	2.50288	0.0894756	-0.70829	3.28601	0.0743525	-2.14328	1.92826	0.169548	68	0.0837952	1.71376	4.75894	322.296	0.909637
mat_12	wsnp_Ex_c33879_42293206	3B	779535627	2	2.49765	0.0898	-0.895313	4.69277	0.0337985	0.923074	0.356217	0.552597	69	0.0603429	0.991287	6.04943	331.702	0.910599
mat_12	Kukri_c6361_407	2D	67969008	2	2.49116	0.0899282	0.695258	3.56714	0.0629619	-1.58165	2.19065	0.143213	73	0.0603673	0.517008	6.51971	347.678	0.910599
mat_12	Ra_c23771_496	3A	685121083	2	2.49185	0.0899694	0.51498	0.892785	0.347928	1.60359	2.30373	0.133504	72	0.107996	2.35728	3.73643	337.909	0.910599
mat_12	RFL_Contig3005_1138	UN	88995411	2	2.49001	0.0901247	0.892705	4.36137	0.04035	0.418712	0.159712	0.690621	72	0.0567677	0.696811	6.2916	347.747	0.910599
mat_12	Ex_c24477_484	5B	523185656	1	2.94708	0.0902159	NaN	NaN	NaN	NaN	NaN	NaN	75	0.0517031	0.950772	5.9572	355.75	0.910599
mat_12	BS00103846_51	7A	646956090	2	2.48355	0.0904727	1.02164	4.85198	0.0307717	0.0963031	0.00997374	0.920722	74	0.0652412	0.945795	5.82361	352.086	0.910599
mat_12	IAAV2086	7A	69220815	2	2.48205	0.0906977	0.435484	0.606007	0.438846	-4.45481	4.90533	0.029939	73	0.0665134	1.34899	5.11505	341.807	0.910599
mat_12	BS00070539_51	7A	126907779	2	2.485	0.0907558	-0.621332	2.27631	0.13593	2.22098	2.99031	0.0882359	70	0.0670273	0.992172	5.8263	332.122	0.910599
mat_12	RAC875_c33037_578	2A	742136424	2	2.48205	0.0907972	-0.927247	4.80851	0.0315974	-0.45574	0.180091	0.672579	72	0.0598281	1.03465	5.87854	343.969	0.910599
mat_12	Kukri_c52429_81	7A	482485778	2	2.47952	0.0908148	2.19053	4.95412	0.0291164	1.69602	0.954464	0.331812	74	0.0618805	1.34618	5.33675	349.634	0.910599
mat_12	BS00066188_51	4D	215185553	1	2.93907	0.0908852	NaN	NaN	NaN	NaN	NaN	NaN	71	0.0518559	0.462301	6.95343	340.745	0.910599
mat_12	wsnp_Ex_c25974_35235456	1D	408075055	2	2.47814	0.0909325	-0.678876	3.03183	0.0858588	-1.11552	1.06677	0.305087	74	0.0581841	0.659397	6.21166	357.288	0.910599
mat_12	wsnp_Ku_c5560_9851459	1D	408404658	2	2.47814	0.0909325	-0.678876	3.03183	0.0858588	-1.11552	1.06677	0.305087	74	0.0581841	0.659397	6.21166	357.288	0.910599
mat_12	RAC875_rep_c71463_98	6B	699006452	2	2.48031	0.0910483	0.419278	0.800839	0.373909	-2.41466	4.75727	0.0325364	71	0.0748819	1.34219	4.60327	330.963	0.910599
mat_12	RAC875_c4135_1028	1B	551862021	2	2.47664	0.0910606	-0.739667	3.82202	0.0544122	-0.699382	0.470558	0.494903	74	0.0535073	0.311484	6.75298	351.96	0.910599
mat_12	IAAV8042	5B	609142930	2	2.47387	0.0914942	1.80376	4.27954	0.0422164	0.125333	0.00336893	0.953878	72	0.0663297	1.25297	5.43761	340.97	0.910599
mat_12	RAC875_c27704_420	4A	570469536	2	2.47355	0.0915213	-0.873467	4.72581	0.0330488	-1.06745	0.721871	0.398387	72	0.068015	0.900938	6.01193	343.57	0.910599
mat_12	wsnp_Ex_c13188_20825019	6D	464719587	2	2.47175	0.0915758	1.75073	4.49571	0.0374262	-2.69569	2.25828	0.137275	73	0.0544325	0.487355	6.41361	347.645	0.892845
mat_12	BS00094893_51	6A	608969449	1	2.93716	0.0916404	NaN	NaN	NaN	NaN	NaN	NaN	62	0.0511617	2.00124	4.52977	294.116	0.910599
mat_12	wsnp_Ex_c4954_8813973	6A	351828731	2	2.46833	0.0918695	-0.923172	4.93345	0.0294874	0.506875	0.170079	0.681267	73	0.0877154	1.49138	5.24152	347.225	0.910599
mat_12	RAC875_c46007_340	2D	81305571	2	2.46868	0.0920427	1.10893	3.08679	0.083303	-3.43416	2.92536	0.0916267	71	0.0953651	1.2132	5.49386	334.111	0.910599
mat_12	Kukri_rep_c97425_164	7A	515003205	2	2.4659	0.0920785	0.648481	1.39191	0.241966	2.58508	4.07765	0.0471777	73	0.138005	1.79331	4.95508	340.658	0.910599
mat_12	BS00063823_51	5A	414048756	2	2.47171	0.0921099	0.141908	0.104859	0.747084	2.74993	4.88084	0.0305792	68	0.102944	1.35649	5.26476	317.138	0.910599
mat_12	BS00022913_51	6A	409092564	2	2.46174	0.0923397	1.2557	2.7753	0.100015	3.65389	3.49844	0.0654356	74	0.0676074	1.12819	5.64447	351.264	0.910599
mat_12	wsnp_Ku_c1549_3054996	6A	421527350	2	2.46174	0.0923397	1.2557	2.7753	0.100015	3.65389	3.49844	0.0654356	74	0.0676074	1.12819	5.64447	351.264	0.910599
mat_12	BS00078715_51	6A	424093700	2	2.46174	0.0923397	1.2557	2.7753	0.100015	3.65389	3.49844	0.0654356	74	0.0676074	1.12819	5.64447	351.264	0.910599
mat_12	CAP11_c1206_301	6A	441806742	2	2.46174	0.0923397	1.2557	2.7753	0.100015	3.65389	3.49844	0.0654356	74	0.0676074	1.12819	5.64447	351.264	0.910599
mat_12	wsnp_Ku_c9763_16287132	4A	742565977	2	2.4663	0.0923531	-0.716113	3.20632	0.0777407	1.77007	1.63478	0.205327	70	0.0767795	1.14469	5.79383	334.81	0.910599
mat_12	RAC875_c17297_341	6A	73995057	2	2.46225	0.0923937	1.0696	4.32658	0.0410818	0.0786271	0.00414583	0.94884	73	0.0591527	0.760955	6.16168	346.277	0.910599
mat_12	wsnp_Ex_c21197_30325539	1D	394257635	2	2.46032	0.0926607	-1.10351	4.8159	0.0314711	0.923074	0.609109	0.437718	72	0.0657996	1.10387	5.79488	343.739	0.912269
mat_12	RAC875_c14064_308	7D	635581032	2	2.458	0.0927615	0.984472	4.86209	0.0306479	0.966277	0.696021	0.406883	73	0.0572228	0.589937	6.38157	346.25	0.912301
mat_12	Excalibur_rep_c113405_180	3B	618151115	2	2.45393	0.0930184	0.29838	0.520569	0.472904	2.24367	4.84529	0.0308836	74	0.0726974	1.67587	4.97445	351.833	0.912575
mat_12	Kukri_c43464_89	3D	603414536	2	2.45258	0.0931355	0.019076	0.00149138	0.9693	2.43093	4.85408	0.0307368	74	0.0863567	1.52222	5.12827	340.629	0.912575
mat_12	BS00094919_51	7A	126049182	2	2.45327	0.0931734	-0.739994	3.25643	0.0753256	-1.00061	1.02866	0.31387	73	0.0598973	1.55285	5.18127	346.154	0.912575
mat_12	BobWhite_c24760_142	7A	128510241	2	2.45414	0.0931981	0.616695	2.15148	0.146848	-1.41318	2.1093	0.150811	72	0.120961	1.11571	5.75772	343.283	0.912575
mat_12	BobWhite_c10977_834	1D	408204552	2	2.45442	0.0932772	0.616331	2.1627	0.145877	-1.36974	1.84143	0.179144	71	0.10529	1.63557	4.59832	328.917	0.912575
mat_12	Excalibur_c44668_382	1A	516454476	2	2.44609	0.0937043	-0.56616	2.4023	0.125481	-1.65166	3.07953	0.0834792	74	0.0594797	0.587489	6.32451	352.013	0.914044
mat_12	wsnp_Ex_rep_c66274_64426901	3A	737677071	2	2.45042	0.0937328	-0.980794	4.76325	0.0324802	1.13495	0.999741	0.320867	70	0.0628105	0.468207	6.66218	334.382	0.914044
mat_12	wsnp_Ex_c6400_11123059	5B	354987805	2	2.4471	0.093917	0.500542	0.715617	0.400468	-3.55809	4.68703	0.0338025	71	0.098244	1.56938	5.33392	339.815	0.914044
mat_12	RAC875_c96033_191	2A	753617305	1	2.88174	0.0939687	NaN	NaN	NaN	NaN	NaN	NaN	72	0.0503638	1.22046	5.68123	344.368	0.914044
mat_12	Excalibur_c48387_58	5B	684745946	2	2.45083	0.0941545	-0.477126	1.335	0.252148	1.99344	3.70208	0.058725	66	1.288	5.16602	1.09702	299.864	0.914044
mat_12	Kukri_c24570_282	1A	539964478	2	2.44129	0.0942246	-1.00243	4.88243	0.0303122	0.63351	0.521261	0.472643	73	0.0536044	0.508639	6.5341	344.951	0.914044
mat_12	Tdurum_contig14559_741	6A	73994210	2	2.43882	0.0943446	-1.07203	4.38481	0.039733	0.187964	0.0261197	0.872055	74	0.0538379	0.784089	6.05002	351.171	0.914044
mat_12	Ra_c69908_1877	1A	213907717	2	2.43857	0.0943673	-1.04812	1.94877	0.16695	-3.5248	4.31823	0.0412227	74	0.083499	1.20574	5.50224	352.625	0.914044
mat_12	BobWhite_c44404_312	7B	17656855	2	2.43822	0.0944955	0.844146	4.87437	0.0304448	-0.328176	0.12787	0.721696	73	0.0648663	1.20564	5.58049	345.33	0.914044
mat_12	wsnp_RFL_Contig2659_2346243	2D	595545931	2	2.44613	0.094567	0.577419	1.18927	0.279504	2.82719	4.15598	0.0455593	66	0.0910355	1.90705	4.48049	312.241	0.914044
mat_12	wsnp_Ex_c15396_23659859	1D	412023662	2	2.43664	0.094636	0.659147	2.94021	0.0907011	-1.23714	1.19904	0.277163	73	0.0546968	0.466045	6.57045	347.805	0.914044
mat_12	D_contig06122_208	1D	408408225	2	2.43785	0.0947329	-0.669428	2.82201	0.0974383	-1.36692	1.11357	0.294935	71	0.0577686	0.663361	6.47751	349.672	0.914044
mat_12	Tdurum_contig10036_474	1B	640162601	1	2.86953	0.0949157	NaN	NaN	NaN	NaN	NaN	NaN	68	0.0437593	0.972015	5.77322	322.94	0.904194
mat_12	BS00022610_51	7D	550097760	2	2.43065	0.0951678	0.692929	3.17316	0.079075	1.68312	2.56929	0.113335	73	0.0557802	0.745121	5.98895	344.014	0.914044
mat_12	Ku_c24974_674	3B	747712577	2	2.43198	0.0952539	1.10097	2.13319	0.148615	-3.96075	3.76422	0.0563895	71	0.0698288	1.27952	5.32664	335.188	0.914044
mat_12	BS00022178_51	1D	16612783	2	2.4308	0.0954659	0.499386	0.638897	0.426854	-6.25678	4.46863	0.0381395	70	0.0634449	1.45793	5.28147	332.726	0.914044
mat_12	wsnp_Ku_c217_430915	3A	737969381	2	2.42706	0.0955892	-0.752336	3.06782	0.0841751	1.50162	2.77572	0.10011	72	0.0574234	1.32679	5.31457	342.113	0.914044
mat_12	BS00084417_51	2B	763633020	2	2.42471	0.0956995	0.921602	2.61081	0.110511	2.24033	4.07552	0.0472339	73	0.0795689	1.69217	5.05566	346.696	0.914044
mat_12	Excalibur_c56097_168	2D	437676962	2	2.42673	0.0957226	0.270553	0.345263	0.558698	3.34257	4.44819	0.0385171	71	0.0595067	1.25872	5.22517	322.993	0.914044
mat_12	wsnp_Ex_c28707_37811644	3D	604669729	2	2.421	0.095934	-0.690105	1.28421	0.260825	-3.48565	4.63088	0.0347089	74	0.0667922	0.956387	5.82718	347.834	0.978167
mat_12	TA007378-0375	6D	58448393	2	2.42441	0.0960379	0.637684	2.44327	0.122605	1.80098	1.35145	0.24903	70	0.0963747	1.85393	4.27541	328.858	0.974811
mat_12	RFL_Contig2814_604	7A	731272634	1	2.8399	0.0961628	NaN	NaN	NaN	NaN	NaN	NaN	75	0.0373739	1.21137	5.62176	356.511	0.914044
mat_12	Excalibur_c34913_743	2A	624460502	1	2.8413	0.0961995	NaN	NaN	NaN	NaN	NaN	NaN	73	0.0377178	0.484531	6.59619	347.054	0.914044
mat_12	BS00022009_51	7B	553884260	2	2.41794	0.0963078	0.455023	1.06822	0.304807	2.05608	4.28318	0.0420804	73	0.0542901	0.980984	5.85892	346.321	0.914044
mat_12	BS00090945_51	3B	465502638	2	2.41518	0.0964596	-0.831737	3.57156	0.0627475	-1.74387	2.37136	0.127903	74	0.0555729	0.613387	6.31671	350.791	0.914044
mat_12	Tdurum_contig62040_1253	6D	56911917	2	2.50101	0.0965511	-0.638531	1.71136	0.199336	3.3106	3.6165	0.0654658	36	0.0973066	8.27894e-05	8.27894	174.391	0.914044
mat_12	wsnp_Ku_c7458_12842353	2D	590678127	2	2.41412	0.0965553	-1.20368	2.63493	0.108848	3.27488	3.87624	0.0527708	74	0.0581976	0.999843	5.7608	351.972	0.914044
mat_12	BS00022292_51	6A	23356696	2	2.41412	0.0965553	-1.20368	2.63493	0.108848	3.27488	3.87624	0.0527708	74	0.0581976	0.999843	5.7608	351.972	0.914044
mat_12	wsnp_Ex_c11621_18716254	7A	713854981	2	2.41412	0.0965553	-1.20368	2.63493	0.108848	3.27488	3.87624	0.0527708	74	0.0581976	0.999843	5.7608	351.972	0.987784
mat_12	Excalibur_c92298_213	1A	593405342	2	2.41627	0.0965597	1.04928	4.73806	0.0328295	0.332729	0.117819	0.732426	72	0.0654254	1.27398	5.55328	344.202	0.914044
mat_12	Kukri_rep_c102001_420	1B	646678606	1	2.83285	0.0965692	NaN	NaN	NaN	NaN	NaN	NaN	75	0.0359255	0.780248	6.14645	355.937	0.914044
mat_12	BS00085556_51	7B	678635301	2	2.41319	0.0966393	-1.05914	4.19183	0.0442183	2.4021	1.46252	0.230432	74	0.07417	0.388811	6.66515	350.279	0.914044
mat_12	BS00067117_51	7D	596675222	2	2.41595	0.0968001	-0.196962	0.264097	0.608961	-2.41454	4.57882	0.035908	70	0.0658648	1.27765	5.74051	334.885	0.914044
mat_12	TA003138-0517	1D	275624362	2	2.40877	0.0970414	0.741373	1.57894	0.212919	1.56587	1.33396	0.251869	74	0.0595929	1.13545	5.59415	351.126	0.914044
mat_12	GENE-0099_329	1A	301777051	2	2.40901	0.0971174	2.51423	2.97584	0.0888063	3.91509	4.81769	0.0313946	73	0.0587031	0.810619	6.12342	347.023	0.914044
mat_12	Tdurum_contig15260_650	4A	726979707	2	2.40748	0.0971587	-0.828065	4.48724	0.0375531	0.734499	0.534192	0.467189	74	0.0566524	0.735738	6.14324	351.357	0.914044
mat_12	Kukri_c67586_306	4A	727115073	2	2.40748	0.0971587	-0.828065	4.48724	0.0375531	0.734499	0.534192	0.467189	74	0.0566524	0.735738	6.14324	351.357	0.914044
mat_12	RAC875_c24515_602	4B	645300226	2	2.40742	0.0972624	-0.261028	0.326063	0.569765	2.35989	4.80961	0.0315325	73	0.0868378	1.3275	5.43858	348.263	0.914044
mat_12	BS00063555_51	7D	73745645	1	2.82625	0.0974617	NaN	NaN	NaN	NaN	NaN	NaN	67	0.0398581	1.8769	4.98207	319.983	0.914044
mat_12	Tdurum_contig15015_883	3D	305456549	2	2.40342	0.097529	-0.130443	0.0902051	0.76477	2.03846	4.71821	0.033093	74	0.0821593	1.50245	5.168	353.902	0.914044
mat_12	wsnp_CAP12_c15_9559	3A	688672958	2	2.40326	0.0976421	-0.171127	0.0892126	0.766041	2.2072	3.44349	0.0675943	73	0.0653256	1.50048	5.25372	346.287	0.914044
mat_12	Ra_c8939_653	5B	476797752	2	2.40149	0.0980101	-0.689596	2.16747	0.14544	1.68517	2.94368	0.0906374	71	0.0690689	1.62843	5.24188	336.031	0.914044
mat_12	wsnp_Ra_c15069_23407152	5B	603643041	2	2.39973	0.0980672	0.726512	3.40525	0.0691595	2.25123	2.3279	0.131516	72	0.0625896	0.511758	6.60324	340.41	0.914044
mat_12	Excalibur_c7338_242	7B	700830049	2	2.39845	0.0981854	0.836777	4.16233	0.0450534	-0.809214	0.546116	0.462345	72	0.0590606	1.11798	5.19875	340.259	0.914044
mat_12	wsnp_Ku_c20701_30355248	5B	404189076	2	2.39391	0.0984041	0.646277	2.48674	0.119133	-1.51377	2.67312	0.106361	74	0.0560198	0.650447	6.24104	353.321	0.914044
mat_12	IAAV7575	1B	104468810	2	2.39436	0.098461	0.793859	3.19902	0.077889	0.803566	0.553635	0.459258	73	0.0690256	0.988092	5.87747	346.592	0.914044
mat_12	TA001383-0516	3B	659587707	2	2.39426	0.0984694	0.997276	4.74576	0.0326456	-0.224063	0.0429163	0.836468	73	0.104887	1.24907	5.6001	341.237	0.914044
mat_12	RAC875_c22831_356	7A	732587166	1	2.804	0.0985565	NaN	NaN	NaN	NaN	NaN	NaN	70	0.0386246	1.34631	4.92922	329.825	0.914044
mat_12	IAAV5819	3B	72716370	2	2.39136	0.0987376	-0.988613	4.32161	0.0411948	0.511556	0.31645	0.575496	73	0.0584306	0.618769	6.38655	352.563	0.914044
mat_12	BobWhite_c13839_78	6A	22443225	2	2.38896	0.0989604	1.39591	4.29415	0.0418257	2.1902	1.34332	0.250279	73	0.0739636	1.57249	4.82374	345.376	0.914044
mat_12	BS00082002_51	5A	476659534	2	2.3861	0.0991275	-1.94045	3.83849	0.0539078	-0.587996	0.150754	0.698946	74	0.0720951	1.23384	5.47312	352.05	0.914044
mat_12	Tdurum_contig32812_325	5B	571185764	2	2.38743	0.0992042	-0.49405	1.41374	0.238397	-1.67492	2.90029	0.092938	72	0.0636922	1.37324	5.50035	343.691	0.914044
mat_12	Kukri_c6386_2065	7A	64728676	2	2.38696	0.0992474	-0.558941	1.99284	0.162412	-1.40944	2.08563	0.153089	72	0.149528	2.06087	4.35823	338.148	0.914044
mat_12	D_GBB4FNX02FX302_98	3D	547778031	1	2.7852	0.0993644	NaN	NaN	NaN	NaN	NaN	NaN	75	0.0445728	1.25763	5.53409	356.464	0.914044
mat_12	RAC875_c46093_492	1B	633332971	2	2.38482	0.0994471	-0.854111	4.16563	0.0449708	-0.498845	0.237811	0.627294	72	0.0698287	0.927062	5.90951	342.168	0.914044
mat_12	wsnp_Ex_c6563_11378915	1B	591109620	2	2.38233	0.0995779	0.888029	4.70096	0.0334516	-0.204925	0.0393445	0.843327	73	0.0608852	0.925419	5.93808	347.315	0.914044
mat_12	tplb0021f14_1700	7B	653889764	2	2.38187	0.0997218	0.390207	0.890831	0.348453	-1.72723	3.09768	0.0827112	72	0.0643541	1.19143	5.32224	345.808	0.914044
mat_12	BS00067706_51	1D	63949851	2	2.38391	0.0997435	0.857611	3.82621	0.0545062	0.786752	0.372184	0.54382	70	0.0570141	0.839194	5.98211	340.306	0.914044
mat_12	wsnp_Ex_rep_c66696_65023462	5D	465364841	2	2.38276	0.0998509	-0.87267	4.23008	0.0434969	-1.10607	1.06893	0.304797	70	0.0967977	1.19519	5.21949	329.188	0.914044
mat_12	RAC875_c93959_96	6A	594959388	2	2.37731	0.100047	-0.881823	4.19198	0.0442651	-1.84398	1.43117	0.235498	73	0.0570677	0.855818	6.06442	345.747	0.914044
mat_12	wsnp_JD_c18695_17091254	2A	71589496	2	2.37523	0.100243	-0.889798	4.74199	0.0327126	-0.221375	0.054235	0.816512	73	0.0587588	0.924424	5.75365	345.003	0.914044
mat_12	Excalibur_c687_961	4A	622237037	2	2.37341	0.100316	-0.755674	2.69203	0.105153	2.349	3.24891	0.0755985	74	0.0558353	1.16376	5.57265	344.866	0.914044
mat_12	BS00058554_51	1D	410792162	2	2.37372	0.100385	0.700432	3.39727	0.0694202	-0.954885	0.733985	0.394437	73	0.0579261	0.322193	6.87233	347.467	0.914044
mat_12	wsnp_Ku_c10362_17156084	3A	12781385	1	2.76588	0.100524	NaN	NaN	NaN	NaN	NaN	NaN	75	0.0349747	1.09039	5.74397	356.245	0.914044
mat_12	wsnp_Ra_c5433_9630495	3D	603263929	2	2.36931	0.100703	0.0191834	0.00155142	0.968689	2.42631	4.71728	0.0331098	74	0.0687657	1.16167	5.56759	352.23	0.914044
mat_12	RAC875_c31922_138	3D	603414437	2	2.36931	0.100703	0.0191834	0.00155142	0.968689	2.42631	4.71728	0.0331098	74	0.0687657	1.16167	5.56759	352.23	0.914044
mat_12	Ku_c17560_146	3A	12980639	2	2.36997	0.100739	0.731359	3.21116	0.077339	1.61485	1.87733	0.174896	73	0.0567943	0.992428	5.85691	348.015	0.914044
mat_12	BobWhite_c39153_131	1D	69097045	2	2.37293	0.100773	-0.886852	3.82677	0.054489	0.780794	0.374187	0.542741	70	0.0633907	1.3776	5.28571	337.082	0.914044
mat_12	Ra_c18630_284	1B	641199214	2	2.37512	0.100791	0.585076	1.79302	0.185084	1.81893	2.73085	0.103106	68	0.0570615	0.736103	5.77254	319.565	0.914044
mat_12	BS00049927_51	1B	108837030	2	2.36992	0.100845	-0.792183	3.1024	0.0824822	0.856479	0.571707	0.452083	72	0.0595645	1.08655	5.83628	341.534	0.914044
mat_12	Tdurum_contig44343_1039	5A	573589801	2	2.36733	0.10089	0.9761	3.37214	0.0703792	-1.9277	3.06672	0.0841109	74	0.0704484	1.6138	5.04265	352.028	0.914044
mat_12	BS00073062_51	3A	12997672	2	2.36582	0.101033	-0.933519	4.7097	0.0332469	0.0731076	0.00574017	0.939814	74	0.0575912	0.867988	5.9552	351.061	0.914044
mat_12	BS00046977_51	7A	88986919	2	2.36662	0.101158	1.187	4.51023	0.0371779	-0.29488	0.049789	0.824071	72	0.0580986	0.772069	5.99884	340.582	0.914044
mat_12	BS00063128_51	7A	126930290	2	2.36476	0.101232	-0.345416	0.73316	0.394702	-1.60035	3.5155	0.0648529	73	0.0936062	2.06166	4.61728	343.595	0.914044
mat_12	BS00022267_51	5D	550511025	2	2.36084	0.101606	1.24307	4.72143	0.0330807	-1.04571	0.350373	0.555756	73	0.0539857	0.322321	6.89202	352.2	0.914044
mat_12	Ra_c21676_178	1D	410464841	2	2.36077	0.101612	-0.622658	2.69813	0.104827	-1.41485	1.28684	0.260393	73	0.0527334	0.44756	6.64934	347.142	0.914044
mat_12	wsnp_Ex_c5412_9564478	2A	41235961	2	2.3604	0.101648	0.585101	2.10742	0.15093	-1.39624	1.53861	0.218852	73	0.0744328	0.676343	6.32269	347.117	0.914044
mat_12	RAC875_c54260_127	1D	408152489	2	2.35909	0.101874	0.645288	2.56031	0.114018	-1.45685	1.37318	0.245184	72	0.0665031	0.886705	6.09356	345.749	0.914044
mat_12	BS00097529_51	7B	750604062	2	2.35672	0.1019	-0.767861	3.10613	0.0821842	0.808011	0.594658	0.443112	74	0.0626359	0.504666	6.4663	352.3	0.914044
mat_12	Tdurum_contig36142_150	5A	572840852	2	2.35614	0.101956	0.725525	1.63897	0.20452	-2.36543	4.38207	0.0397933	74	0.0828979	1.41012	5.28637	354.165	0.914044
mat_12	BobWhite_c36693_210	7B	33598482	2	2.35589	0.10198	0.826567	1.36651	0.246216	-2.86807	2.1202	0.149655	74	0.053838	0.860849	5.96264	353.631	0.914044
mat_12	Excalibur_c22205_573	1B	660012260	2	2.35266	0.102389	0.738285	4.0335	0.0483569	-0.519666	0.272891	0.603003	73	0.0545505	0.519048	6.49951	342.204	0.914044
mat_12	Kukri_rep_c73457_419	6D	409345047	2	2.35043	0.102504	0.633314	1.99897	0.161657	2.31033	3.9032	0.0519746	74	0.0537179	1.28969	5.41786	353.086	0.914044
mat_12	RFL_Contig2972_2819	2A	761307238	1	2.73052	0.102684	NaN	NaN	NaN	NaN	NaN	NaN	75	0.045433	1.3281	5.45626	356.39	0.914044
mat_12	RAC875_c23775_406	5A	572367344	2	2.34922	0.10272	0.672948	1.70463	0.19584	-2.49261	3.94989	0.0506786	73	0.069098	1.37645	5.22573	345.305	0.914044
mat_12	IAAV9053	5D	451674753	2	2.34562	0.102968	-0.748345	1.15067	0.286942	2.40814	1.92871	0.169123	74	0.0628354	1.06967	5.68436	351.408	0.914044
mat_12	Excalibur_c62090_277	4A	116140905	2	2.34577	0.103156	0.352943	0.670588	0.415587	-2.9444	4.52659	0.0368461	72	0.0532587	0.996044	5.83691	345.345	0.914044
mat_12	Tdurum_contig49206_350	6A	609109623	2	2.34439	0.103187	-1.21869	4.63954	0.0345914	0.872054	0.708105	0.40286	73	0.0585671	0.932591	5.66618	343.269	0.914044
mat_12	BobWhite_c11808_975	6D	7098479	2	2.349	0.10328	-0.786634	1.3588	0.247879	1.5667	1.2351	0.270389	68	0.0673658	1.87392	5.08473	330.29	0.914044
mat_12	wsnp_Ex_c5547_9774195	3B	579890653	2	2.34228	0.103292	1.02589	3.11131	0.0819342	-2.99849	2.94924	0.090158	74	0.0797825	0.647045	6.2799	351.772	0.914044
mat_12	Excalibur_c4361_309	2D	4356337	2	2.34217	0.103303	1.34104	2.36477	0.128425	3.49467	4.31547	0.0412858	74	0.056156	1.10249	5.65265	351.722	0.914044
mat_12	GENE-1634_405	3D	498882428	2	2.34495	0.103339	0.979297	4.68962	0.0337549	0.0195696	0.000271166	0.986909	71	0.0623461	0.754456	6.3492	338.783	0.914044
mat_12	BS00099610_51	7A	19969567	2	2.34125	0.103392	-0.747516	3.26373	0.074949	-1.18947	1.23167	0.270724	74	0.0529273	0.858259	5.98726	355.933	0.914044
mat_12	RFL_Contig3424_754	7D	19717846	2	2.34125	0.103392	-0.747516	3.26373	0.074949	-1.18947	1.23167	0.270724	74	0.0529273	0.858259	5.98726	355.933	0.914044
mat_12	Excalibur_c2454_333	2B	26581895	2	2.34165	0.103453	-0.851719	1.3176	0.254822	-1.89026	1.52097	0.221484	73	0.0535686	0.912965	5.97809	344.171	0.914044
mat_12	wsnp_JD_c5067_6187376	3B	486379155	2	2.34028	0.103486	1.12988	4.3385	0.040763	-1.15842	0.983248	0.324674	74	0.0691432	0.558316	6.40717	352.359	0.914044
mat_12	BS00037898_51	3B	488543118	2	2.34028	0.103486	1.12988	4.3385	0.040763	-1.15842	0.983248	0.324674	74	0.0691432	0.558316	6.40717	352.359	0.914044
mat_12	Kukri_c34195_357	3A	536627340	2	2.34246	0.103688	0.664972	1.4635	0.230503	2.89371	2.13259	0.148736	70	0.0837018	1.52962	4.84383	327.177	0.914044
mat_12	wsnp_Ku_c10877_17896883	5B	647923692	2	2.33923	0.103688	0.973968	4.66522	0.0341099	-1.06593	0.466377	0.49685	73	0.0513853	0.38608	6.75874	346.548	0.914044
mat_12	BS00059791_51	6D	454635152	2	2.34129	0.103695	0.420579	0.940989	0.335364	2.16354	2.83738	0.0965482	71	0.0612502	0.975432	5.71256	336.15	0.914044
mat_12	Ku_c554_1239	7A	81135496	2	2.33808	0.1037	-0.0128411	0.000702656	0.978925	-2.94061	4.44826	0.0383671	74	0.0796226	1.34544	5.4001	352.199	0.914044
mat_12	wsnp_Ex_c2017_3787478	UN	82524040	2	2.33897	0.103713	-0.665665	1.76175	0.1886	-3.0029	3.75431	0.056594	73	0.0720545	1.36146	5.24846	345.057	0.914044
mat_12	IAAV7594	5B	27806105	2	2.33778	0.10373	-0.337998	0.49811	0.482578	-2.77511	4.63286	0.0346713	74	0.0740773	1.27585	5.43417	351.69	0.914044
mat_12	RAC875_c64253_435	5D	446476863	2	2.34042	0.103779	-0.913142	3.77437	0.0560665	-1.28905	1.61658	0.207778	71	0.0609193	1.17132	5.6254	337.749	0.914044
mat_12	IACX6036	5D	464068548	2	2.3362	0.103884	0.970007	3.95007	0.0506211	-0.563938	0.157551	0.692579	74	0.0846657	1.14051	5.62483	351.543	0.914044
mat_12	Ra_c17608_960	UN	35424126	2	2.33611	0.103893	0.528701	1.206	0.275736	-2.59813	4.56304	0.0360222	74	0.0624015	0.967537	5.81504	346.734	0.914044
mat_12	wsnp_Ku_c5378_9559013	3A	569427017	2	2.33704	0.104004	0.517928	1.48128	0.227605	-1.97794	3.65524	0.0599287	72	0.062929	1.58638	5.04425	342.288	0.914044
mat_12	wsnp_Ex_rep_c66763_65120251	5D	80699345	2	2.33695	0.104012	1.00523	1.90365	0.172	-2.07136	1.32853	0.252933	72	0.0810868	0.878945	6.09333	344.266	0.914044
mat_12	GENE-0675_104	2B	647105352	2	2.33733	0.10408	-0.465245	1.14354	0.28858	-1.97782	4.12717	0.0459977	71	0.108066	2.17801	3.96738	331.606	0.914044
mat_12	Excalibur_c23155_327	7D	62543906	2	2.33169	0.104425	0.663336	2.79256	0.0990445	-1.10611	1.0214	0.315571	73	0.0507537	0.51635	6.51563	345.02	0.914605
mat_12	wsnp_Ex_rep_c66358_64543089	3A	685357796	2	2.33373	0.104432	0.814874	3.92369	0.0515405	0.735005	0.256848	0.613887	71	0.0552154	0.760754	6.18188	337.681	0.914605
mat_12	TA024439-0060	6D	38773229	2	2.33157	0.104437	-0.508641	0.859788	0.356896	-3.09106	4.58944	0.0355518	73	0.0578835	1.16099	5.45166	346.549	0.987784
mat_12	Excalibur_c12482_901	6D	25782617	2	2.32936	0.104653	-1.19795	2.53614	0.115648	3.63465	3.42465	0.0683324	73	0.0601326	1.1792	5.64597	346.011	0.915423
mat_12	Kukri_c11318_591	4D	293546252	2	2.32555	0.104929	-0.294597	0.415868	0.521027	1.8872	3.08739	0.0830943	74	0.0535903	0.99509	5.79686	354.014	0.915423
mat_12	Tdurum_contig25520_363	3A	57958169	2	2.3262	0.104965	0.0434799	0.0102604	0.919599	-2.06464	4.61228	0.0351104	73	0.0604743	1.29201	5.48065	346.294	0.915423
mat_12	Tdurum_contig14847_144	1A	10070324	1	2.69423	0.105073	NaN	NaN	NaN	NaN	NaN	NaN	73	0.057391	1.34534	5.6045	348.251	0.915423
mat_12	wsnp_Ex_c7216_12390889	7A	520904177	2	2.32828	0.105075	0.719237	1.68865	0.198104	1.18491	1.24916	0.26759	70	0.0591468	1.06467	6.01764	337.264	0.915423
mat_12	RAC875_c31051_490	4A	60352833	2	2.32675	0.105117	0.866569	4.63375	0.0347979	0.448589	0.196772	0.658707	71	0.100672	1.77638	4.46168	332.412	0.915423
mat_12	GENE-0762_631	2B	790441795	2	2.32225	0.105355	0.402495	1.0681	0.304835	-1.41763	3.05536	0.084734	73	0.0572897	1.06119	5.77581	345.014	0.916018
mat_12	Ra_c9427_300	7A	78434149	2	2.3263	0.105382	0.44858	1.12332	0.292955	2.16222	4.08001	0.0473358	69	0.142929	1.77026	4.43222	323.938	0.916018
mat_12	wsnp_Ex_c3831_6966926	1D	409496782	2	2.31876	0.105602	-0.634846	2.75611	0.101173	-1.12454	1.06574	0.305317	74	0.0529485	0.488205	6.5019	352.432	0.916783
mat_12	wsnp_Ex_c27150_36365659	3A	571919801	2	2.318	0.105677	0.541049	1.42557	0.236354	-1.94861	4.18149	0.0444737	74	0.0774849	1.18804	5.56885	351.242	0.916783
mat_12	wsnp_Ex_c18665_27541568	1D	416099372	2	2.31916	0.105764	0.717066	3.42271	0.0684667	-1.09916	0.846195	0.360746	72	0.0536137	0.458598	6.63816	343.347	0.916783
mat_12	Excalibur_c30955_479	1D	404062504	2	2.31542	0.106033	0.211133	0.115371	0.735099	4.38674	4.57923	0.035751	73	0.0826712	1.53774	5.25146	345.627	0.918166
mat_12	BS00099881_51	7A	512760151	2	2.31505	0.106172	0.651287	1.47476	0.22862	2.7215	3.47118	0.0665829	72	0.064551	1.0348	5.88948	344.992	0.918166
mat_12	BS00067746_51	7D	77183130	2	2.31257	0.106218	0.0232939	0.00234377	0.96152	-2.93441	4.41628	0.0390493	74	0.055452	1.2373	5.48387	353.131	0.918166
mat_12	wsnp_Ex_c12674_20142989	6B	668776550	2	2.31126	0.106448	-0.511646	1.7293	0.192673	-1.74583	3.6623	0.0596321	73	0.0551769	0.990889	5.88303	345.438	0.919305
mat_12	JD_c42022_319	7A	128756200	2	2.30515	0.107061	0.541473	1.79521	0.184507	-1.47024	2.29573	0.134108	73	0.0603013	0.963227	5.88779	346.762	0.919447
mat_12	Kukri_c30461_857	1B	614791356	2	2.30421	0.107156	-0.135809	0.101881	0.750508	1.91979	4.49497	0.0374415	73	0.168128	2.10634	3.95378	341.198	0.919447
mat_12	BobWhite_c13238_386	5A	478018570	2	2.30321	0.107257	-1.00091	3.97996	0.0498302	0.136218	0.0114241	0.915179	73	0.0535742	1.10163	5.71257	346.116	0.919447
mat_12	GENE-4208_229	6A	613483581	2	2.30932	0.107303	0.513244	1.53449	0.219827	2.16981	2.73934	0.102653	67	0.0626856	1.32945	5.22484	316.905	0.919447
mat_12	BS00059383_51	3B	18247970	2	2.29852	0.107631	0.74511	2.1943	0.142826	1.55803	1.76389	0.188278	74	0.0565237	0.840123	6.00817	351.268	0.919447
mat_12	wsnp_Ex_c9722_16062937	1A	519469869	2	2.30009	0.107674	0.837275	4.55095	0.0363576	-0.5391	0.318878	0.574063	72	0.0577824	0.756471	6.26823	343.31	0.919447
mat_12	wsnp_CAP12_c7952_3403722	6D	3445217	2	2.29709	0.107876	-0.590178	2.35468	0.12929	1.36554	2.53761	0.115544	73	0.0630282	1.40252	5.36962	351.211	0.987784
mat_12	Kukri_c40353_179	7A	712057552	2	2.29901	0.107889	-0.581386	1.82941	0.180551	1.90536	2.71909	0.103635	71	0.0789753	1.07261	5.93894	339.078	0.919447
mat_12	wsnp_Ex_c54772_57528275	6B	710103561	2	2.29625	0.107961	-0.945006	3.71049	0.0580195	1.19467	0.825011	0.366749	73	0.0538525	0.800502	6.12277	344.29	0.919447
mat_12	wsnp_Ku_c26784_36748247	6D	41533148	2	2.29511	0.108077	1.25451	2.77228	0.100256	-1.85131	0.769081	0.383418	73	0.0538737	0.889935	6.02587	346.962	0.919447
mat_12	GENE-1012_303	2D	577076870	2	2.30102	0.108138	2.29748	4.59841	0.0356885	-1.80829	2.2635	0.137225	67	0.0584064	0.996296	5.45039	313.262	0.919447
mat_12	Kukri_c15823_196	5D	552697983	1	2.64462	0.108153	NaN	NaN	NaN	NaN	NaN	NaN	75	0.0330631	0.75151	6.20621	356.885	0.919447
mat_12	RAC875_c17720_570	2B	47181449	2	2.29536	0.108153	0.321614	0.323074	0.57156	3.23098	4.58733	0.035641	72	0.076739	1.46326	5.35805	343.764	0.919447
mat_12	RFL_Contig304_729	3D	349634739	2	2.29614	0.108179	1.03226	3.6067	0.0616685	-1.78383	2.20401	0.142142	71	0.0734479	0.828061	6.13631	329.172	0.919447
mat_12	wsnp_Ex_c2137_4014383	2A	755931120	2	2.29267	0.108427	-0.318887	0.801736	0.3736	3.04978	3.54422	0.0638509	72	0.101465	1.80002	5.07875	344.112	0.919447
mat_12	Tdurum_contig31586_197	2B	302060426	2	2.28988	0.108509	-1.11994	4.2338	0.0431986	-1.15265	0.978219	0.325906	74	0.0689165	0.618915	6.31909	351.338	0.919447
mat_12	Tdurum_contig54689_646	5A	684941737	1	2.64322	0.108552	NaN	NaN	NaN	NaN	NaN	NaN	70	0.0456093	1.36594	5.07399	330.366	0.919447
mat_12	RAC875_c49612_102	1D	412023715	2	2.28763	0.10874	-0.701136	3.43162	0.0680018	-0.810158	0.595795	0.442679	74	0.0513413	0.344873	6.74331	351.897	0.919447
mat_12	wsnp_CAP11_c2438_1258747	3A	471358721	2	2.28641	0.109066	-0.48859	1.27179	0.263228	-1.95794	4.10277	0.046573	72	0.0554536	1.00411	5.95624	341.745	0.919447
mat_12	D_F1BEJMU01DVMII_118	3D	603380276	2	2.28533	0.109075	-0.000905014	3.35017e-06	0.998545	2.40202	4.53009	0.0367268	73	0.054624	1.24525	5.56182	346.59	0.919447
mat_12	Kukri_c33315_159	4A	630764502	2	2.28409	0.109201	-1.47053	4.51785	0.0369742	0.884669	0.175922	0.676151	73	0.0516239	0.597499	6.42527	346.635	0.919447
mat_12	BobWhite_rep_c52979_181	6B	9002266	2	2.28554	0.10937	0.544974	1.64575	0.203832	4.9202	3.4111	0.0690474	70	0.0687976	1.48016	4.88513	328.517	0.919447
mat_12	wsnp_RFL_Contig3943_4376736	6A	147474974	1	2.62675	0.109389	NaN	NaN	NaN	NaN	NaN	NaN	74	0.0364993	1.02055	5.97954	353.857	0.919447
mat_12	wsnp_Ex_c5378_9505533	3B	488187581	2	2.28306	0.10941	1.12476	4.21126	0.0438448	-1.17452	0.985209	0.324287	72	0.0575982	0.55145	6.57391	343.844	0.919447
mat_12	Ku_c101046_1063	4B	612846807	2	2.27985	0.109538	-0.877903	3.927	0.0512825	-1.12248	1.3805	0.243835	74	0.0570082	1.22053	5.5184	351.543	0.919447
mat_12	RFL_Contig3622_1217	1D	407875548	2	2.28178	0.109542	-0.629747	2.37646	0.127622	-1.47941	1.42282	0.236911	72	0.0537029	1.02309	5.92686	343.057	0.919447
mat_12	wsnp_Ex_c1318_2519998	1D	408073878	2	2.28178	0.109542	-0.629747	2.37646	0.127622	-1.47941	1.42282	0.236911	72	0.0537029	1.02309	5.92686	343.057	0.919447
mat_12	RAC875_c43831_91	1D	408078400	2	2.28178	0.109542	-0.629747	2.37646	0.127622	-1.47941	1.42282	0.236911	72	0.0537029	1.02309	5.92686	343.057	0.919447
mat_12	wsnp_Ex_rep_c66939_65371026	7A	7586604	2	2.28358	0.109571	-0.582065	1.86818	0.176121	2.55346	1.78746	0.185627	70	0.0608942	1.46844	5.17182	332.799	0.919447
mat_12	Kukri_c8757_107	5B	686935180	2	2.28541	0.10961	1.02054	4.38014	0.0401501	1.10117	0.84895	0.360155	68	0.0578181	0.915267	5.6831	321.352	0.919447
mat_12	RAC875_rep_c114236_188	2D	73572911	2	2.2793	0.109797	-0.893274	4.23784	0.0432031	-0.0325208	0.000819514	0.977242	72	0.0522429	0.615781	6.47989	344.499	0.919447
mat_12	D_contig79410_237	5D	542659848	2	2.2793	0.109798	-0.971727	4.55469	0.0362833	-0.734153	0.183878	0.66936	72	0.0549236	0.451102	6.7375	343.154	0.919447
mat_12	BS00093522_51	5B	571231210	2	2.27651	0.109983	-0.798618	3.83041	0.054208	-1.46715	1.52253	0.22125	73	0.0664181	1.31249	5.48922	347.355	0.919447
mat_12	Excalibur_c48047_90	3B	617682826	2	2.27552	0.110188	-0.317944	0.538631	0.465417	2.21456	4.48911	0.0376112	72	0.0567796	1.29646	5.5415	338.628	0.919447
mat_12	wsnp_BE443187B_Ta_2_1	5B	410531915	2	2.27285	0.110263	-0.681372	2.90217	0.0927145	-1.06693	1.44318	0.233508	74	0.058316	0.965557	5.83303	351.144	0.919447
mat_12	Tdurum_contig14460_561	UN	82524305	1	2.61247	0.110282	NaN	NaN	NaN	NaN	NaN	NaN	75	0.0316563	0.566653	6.48716	357.152	0.919447
mat_12	Excalibur_rep_c109577_698	2D	631959232	2	2.2727	0.110378	-0.917977	1.93879	0.168085	-2.67398	4.3402	0.0407737	73	0.0709745	0.87632	6.07836	345.721	0.919447
mat_12	BobWhite_rep_c52024_65	3B	144058172	2	2.27462	0.110495	1.089	3.55292	0.0636525	-0.0620546	0.00313621	0.955502	70	0.0598228	0.543372	6.73612	335.368	0.919447
mat_12	IAAV6689	3D	44195552	2	2.31136	0.110531	-0.696435	3.10691	0.0846038	-3.86755	2.12477	0.151729	47	0.0691418	6.07646e-05	6.07646	213.918	0.919447
mat_12	Kukri_rep_c102231_265	1A	7181831	2	2.27287	0.110569	0.715116	1.78547	0.185807	1.51545	1.14418	0.288445	71	0.126238	1.7842	4.46305	333.286	0.919447
mat_12	RAC875_c5433_682	3D	603264070	2	2.26978	0.110681	0.0131936	0.000718864	0.978684	2.40304	4.50867	0.037161	73	0.0544919	1.14126	5.68264	346.706	0.919447
mat_12	wsnp_Ku_c11052_18135847	3A	61348456	2	2.26714	0.110956	0.592099	1.76027	0.188784	-1.69718	2.64145	0.108478	73	0.0653971	1.23038	5.56335	346.286	0.919447
mat_12	Excalibur_c49875_479	2D	634877305	2	2.26735	0.111038	0.0179946	0.000832672	0.97706	-2.44802	4.2238	0.0435409	72	0.055117	1.20108	5.56806	334.183	0.919447
mat_12	Kukri_c29121_654	1D	410466842	2	2.26552	0.111126	-0.598875	2.30618	0.133239	-1.34864	1.32521	0.253467	73	0.0543157	0.517038	6.57553	347.238	0.919447
mat_12	RAC875_c34939_86	7A	731266483	2	2.26624	0.111154	0.754223	4.27358	0.042356	-0.262763	0.0730689	0.787704	72	0.139254	1.86126	4.13278	335.558	0.919447
mat_12	Excalibur_rep_c104570_201	4A	629476583	2	2.26429	0.111155	1.45947	4.52087	0.0368655	1.07863	0.145792	0.703699	74	0.0562427	0.557222	6.40299	352.48	0.919447
mat_12	Excalibur_c74397_238	4A	733915685	2	2.26429	0.111155	1.45947	4.52087	0.0368655	1.07863	0.145792	0.703699	74	0.0562427	0.557222	6.40299	352.48	0.998153
mat_12	wsnp_Ku_c23012_32893918	1A	516373127	2	2.26589	0.111191	0.671729	2.59714	0.111494	-1.64042	2.76829	0.100557	72	0.0598595	0.925929	6.04974	343.767	0.919447
mat_12	wsnp_Ex_c13721_21532196	7A	538784257	2	2.26314	0.111375	0.774607	2.52009	0.116786	1.11519	1.31113	0.255982	73	0.0559242	1.28918	5.49637	347.563	0.919447
mat_12	wsnp_Ra_c19083_28215239	2B	33939929	2	2.26408	0.11138	-0.171222	0.172789	0.678898	2.50523	4.51363	0.0371086	72	0.0630515	1.18718	5.12257	328.715	0.919447
mat_12	IACX3991	7B	37854659	2	2.2611	0.111692	0.634505	1.85794	0.17717	-2.05653	1.77423	0.18712	72	0.052631	1.17453	5.69555	338.727	0.92078
mat_12	BS00080752_51	2A	718355388	2	2.26066	0.111738	-0.159319	0.11783	0.732414	2.13742	3.94996	0.0507305	72	0.0781693	1.33808	5.54746	346.779	0.92078
mat_12	tplb0043k02_463	1B	631833694	2	2.26301	0.112052	0.711958	2.67339	0.106799	1.86677	2.23149	0.139989	67	0.0533057	0.902813	5.76232	315.938	0.921951
mat_12	Excalibur_rep_c102136_270	7B	498519595	2	2.25646	0.112077	-0.736603	2.47453	0.120089	1.46631	2.29245	0.134382	73	0.0551008	1.02128	5.86183	345.355	0.921951
mat_12	JD_c581_466	4A	713519475	2	2.25126	0.112527	0.256078	0.0856476	0.770615	2.71852	2.97085	0.0890102	74	0.0862973	1.44522	5.24921	353.495	0.923028
mat_12	BobWhite_c11327_185	7D	19405480	2	2.25126	0.112527	0.256078	0.0856476	0.770615	2.71852	2.97085	0.0890102	74	0.0862973	1.44522	5.24921	353.495	0.923028
mat_12	TA005986-0607	5B	702478303	2	2.25187	0.112563	-1.15903	3.96845	0.0501531	0.149893	0.00759036	0.930816	73	0.0586499	0.69638	6.18653	348.572	0.923028
mat_12	tplb0022c16_494	3D	299594294	2	2.24913	0.112753	0.904507	4.36874	0.0400874	-0.571805	0.33186	0.566338	74	0.0865396	1.02693	5.7894	354.282	0.923028
mat_12	BobWhite_c11059_169	2D	32054629	2	2.2488	0.112888	-0.351655	0.616553	0.434907	1.99117	2.77712	0.0999649	73	0.0910198	1.08639	5.7709	346.614	0.923028
mat_12	wsnp_Ku_c10515_17368422	4B	652775561	2	2.24963	0.112903	0.370767	0.441098	0.508744	-1.94314	2.76075	0.101013	72	0.1121	3.34836	3.5183	337.937	0.923028
mat_12	BS00063378_51	6A	582960868	2	2.24784	0.11299	0.681335	2.85433	0.0954545	1.20643	0.970391	0.327881	73	0.0596633	1.24317	5.57492	345.861	0.923028
mat_12	BS00022110_51	5A	440264113	2	2.24607	0.113078	1.15353	3.93409	0.0510782	-0.279194	0.0408119	0.840463	74	0.0598458	1.22999	5.50364	352.289	0.923028
mat_12	RFL_Contig622_1601	5D	562062800	2	2.24512	0.113179	1.08076	2.64544	0.108157	-3.201	3.34919	0.0713206	74	0.0496406	0.428352	6.61188	364.213	0.923028
mat_12	Tdurum_contig12941_1413	3A	505232046	2	2.24592	0.113195	0.815536	3.60836	0.0614954	1.2253	1.70264	0.196098	73	0.0533918	1.05213	5.82471	344.745	0.923028
mat_12	Ra_c22675_581	4A	611201089	2	2.24147	0.113879	-1.10662	3.92317	0.0515555	0.392997	0.0535023	0.817752	71	0.0641296	1.31925	5.32673	335.284	0.926548
mat_12	BS00050057_51	5B	658370071	2	2.23871	0.113965	0.928009	4.43253	0.0387494	0.471884	0.147976	0.701611	73	0.0496877	0.259216	6.92562	342.533	0.926548
mat_12	Excalibur_c50584_358	5D	549770496	2	2.23691	0.114059	-1.14564	3.78767	0.0554806	-1.96913	1.74075	0.191168	74	0.0586321	0.770305	6.12029	354.387	0.926548
mat_12	BS00054881_51	7B	44623054	2	2.23654	0.114099	0.727318	2.5452	0.11495	-1.70576	1.09608	0.298581	74	0.0593316	1.07263	5.72925	349.421	0.926548
mat_12	BobWhite_c33898_150	4A	630845815	2	2.23725	0.114122	-1.46497	4.4653	0.0380568	1.0532	0.136185	0.713186	73	0.0576492	0.565254	6.53284	347.114	0.926548
mat_12	RFL_Contig530_2305	1A	424803836	1	2.56741	0.114519	NaN	NaN	NaN	NaN	NaN	NaN	59	0.0904456	1.93417	3.18051	265.865	0.928594
mat_12	Ra_c272_1632	1A	337009593	2	2.23214	0.114573	1.14099	3.92632	0.0513021	-0.220891	0.0369323	0.848137	74	0.0576359	0.86342	5.97727	352.088	0.928594
mat_12	Excalibur_c30167_243	2A	12000556	2	2.23185	0.114807	0.855382	4.33945	0.040841	-0.635119	0.569778	0.452844	72	0.052792	0.63835	6.30878	342.972	0.92969
mat_12	wsnp_Ra_c34117_42876812	3A	571918980	2	2.23008	0.114999	0.481344	0.990155	0.323084	-2.06366	4.2409	0.0431299	72	0.0551127	1.19333	5.72196	343.899	0.930435
mat_12	Tdurum_contig11077_122	1A	551982045	1	2.54163	0.115143	NaN	NaN	NaN	NaN	NaN	NaN	75	0.0379646	1.24974	5.5718	355.269	0.930794
mat_12	Tdurum_contig14559_78	6A	73995253	2	2.22471	0.115378	0.613207	1.5859	0.211925	-1.3692	1.40332	0.240011	74	0.0545295	0.719108	6.18173	347.966	0.931891
mat_12	BS00021728_51	1A	504246911	2	2.22561	0.115484	-0.740727	4.05161	0.0479223	0.615515	0.340918	0.56115	72	0.0540886	0.651909	6.41421	341.967	0.93194
mat_12	wsnp_JD_c9360_10216330	3B	610751737	2	2.22063	0.115922	0.2671	0.386502	0.536107	2.18302	4.42063	0.0390041	73	0.0579636	1.41791	5.36869	346.371	0.934632
mat_12	BS00022541_51	7A	610932904	2	2.21885	0.116017	-0.164663	0.125008	0.724684	2.12673	4.43453	0.0386585	74	0.0549366	0.948967	5.86527	352.145	0.934632
mat_12	wsnp_RFL_Contig4456_5258284	6B	706097414	1	2.53091	0.116207	NaN	NaN	NaN	NaN	NaN	NaN	70	0.0682315	1.45304	4.93518	329.964	0.935235
mat_12	Kukri_rep_c112425_506	4D	329137467	2	2.22119	0.116292	0.830992	3.37855	0.0704184	2.20572	1.75665	0.189478	69	0.052331	0.569277	6.61228	327.942	0.935235
mat_12	BS00003971_51	3A	571407788	2	2.21522	0.116515	-0.541512	1.41377	0.238338	-1.98458	3.93618	0.0510706	73	0.0759646	1.20766	5.61226	345.5	0.935381
mat_12	wsnp_Ex_c18733_27607958	2B	212577783	2	2.21339	0.116716	0.799215	3.12153	0.0815025	0.724225	0.434839	0.511728	73	0.0730405	1.25327	5.57584	342.982	0.935381
mat_12	wsnp_Ku_c16358_25225060	2A	715301615	1	2.51829	0.116797	NaN	NaN	NaN	NaN	NaN	NaN	75	0.0307268	1.22342	5.60621	356.336	0.935381
mat_12	RFL_Contig2471_119	3D	17413844	2	2.21141	0.116833	-0.176429	0.108442	0.742868	-2.51293	3.59051	0.0620708	74	0.0843859	1.07643	5.77881	351.917	0.935381
mat_12	wsnp_Ex_c5296_9365860	1B	627946304	1	2.51888	0.116872	NaN	NaN	NaN	NaN	NaN	NaN	73	0.0326583	1.22013	5.4969	346.456	0.935381
mat_12	Excalibur_c15309_646	3A	8686949	1	2.5163	0.116939	NaN	NaN	NaN	NaN	NaN	NaN	75	0.0301482	0.805313	6.14093	356.304	0.935381
mat_12	Kukri_rep_c102790_398	5D	205116272	2	2.21072	0.11701	0.797737	2.10635	0.151032	1.11738	0.828736	0.365676	73	0.0614036	1.15934	5.68153	345.653	0.935381
mat_12	IAAV6119	7A	709405369	2	2.20541	0.1177	-0.442883	1.12	0.293506	1.83403	2.92974	0.0913267	72	0.058262	1.37931	5.49392	341.916	0.936196
mat_12	wsnp_Ex_rep_c101526_86881496	2B	457680702	2	2.20328	0.117733	0.808023	4.17967	0.0445187	-0.511199	0.308495	0.580303	74	0.0541298	0.894418	5.94134	351.851	0.987784
mat_12	BS00064349_51	1A	544431312	2	2.20543	0.117913	0.141678	0.103945	0.748121	1.92588	4.32262	0.0413282	70	0.149815	2.65534	3.34955	328.136	0.936196
mat_12	BS00075569_51	7B	741806994	2	2.20147	0.118034	0.814697	4.36988	0.0401108	-0.385296	0.118783	0.731363	73	0.0555301	0.915692	5.99706	346.804	0.936196
mat_12	Jagger_c5275_99	7A	706125785	2	2.20028	0.118066	-0.0156614	0.000784538	0.977731	-2.38404	4.00351	0.0491242	74	0.0889435	1.87204	4.86304	352.183	0.936196
mat_12	wsnp_Ex_c19082_27999258	6B	61495431	2	2.20114	0.118071	-0.9767	3.19653	0.0780022	-1.39164	0.500143	0.48172	73	0.0493224	0.515576	6.56352	341.131	0.936196
mat_12	Tdurum_contig15586_563	4A	684514499	1	2.50047	0.118077	NaN	NaN	NaN	NaN	NaN	NaN	75	0.0391467	0.471318	6.63534	357.123	0.936196
mat_12	BS00075368_51	5D	550945209	2	2.19841	0.118375	-1.22469	4.39666	0.0395226	-1.00457	0.435247	0.51153	73	0.0504399	0.609303	6.44262	346.778	0.936196
mat_12	Tdurum_contig67619_532	6B	718376151	2	2.21428	0.118385	0.5427	1.8767	0.17599	-1.65148	2.49006	0.120007	59	0.0837587	1.81219	4.48207	273.982	0.936196
mat_12	BS00061151_51	7A	174696472	2	2.19809	0.118411	1.09849	4.11195	0.0462827	-0.23486	0.0197841	0.888534	73	0.0505612	0.55675	6.47841	346.845	0.936196
mat_12	BobWhite_c20374_162	7A	284528187	2	2.19763	0.118462	0.468099	0.984158	0.324497	-2.55894	4.22526	0.043454	73	0.0563296	0.860911	6.07367	347.788	0.936196
mat_12	wsnp_Ku_c31419_41152151	7B	43545238	2	2.19535	0.118617	-0.760699	2.99816	0.0875835	-1.77294	0.794424	0.375694	74	0.0761229	1.05139	5.77105	352.163	0.936196
mat_12	BS00078982_51	1A	24247329	2	2.19793	0.118638	0.0121811	0.000937388	0.975662	1.91042	4.38678	0.0398401	71	0.155143	2.12862	4.01704	330.659	0.936196
mat_12	BobWhite_rep_c62985_546	1B	168418361	1	2.49041	0.118866	NaN	NaN	NaN	NaN	NaN	NaN	74	0.0299027	0.947268	5.95472	353.358	0.936196
mat_12	Excalibur_c43567_679	1B	22707115	2	2.19076	0.119131	1.07564	4.37259	0.0400022	-0.811612	0.091146	0.763584	74	0.0562353	1.15826	5.60081	352.227	0.936196
mat_12	wsnp_Ku_c19587_29102203	6D	2167895	2	2.19099	0.119205	-0.881668	1.1585	0.28537	2.42389	1.42482	0.236531	73	0.0650022	1.77708	4.98006	337.666	0.936196
mat_12	Tdurum_contig13268_1118	7D	615905331	2	2.1885	0.119385	-0.368619	0.71915	0.399195	1.93869	4.33149	0.0409214	74	0.0603028	1.08569	5.69186	354.564	0.936196
mat_12	BS00061911_51	7A	722573862	2	2.18902	0.119427	0.190466	0.152093	0.697695	2.41649	4.36365	0.0402489	73	0.0578404	1.37007	5.42275	347.526	0.936196
mat_12	Excalibur_rep_c111743_194	3B	490885941	2	2.18704	0.119651	-0.904431	3.96519	0.0502451	-1.36075	1.47887	0.227923	73	0.0702655	1.24174	5.55614	347.476	0.936196
mat_12	Ku_c1454_984	5D	22378129	2	2.18725	0.11973	-0.825547	3.93937	0.0510333	0.611122	0.345165	0.558727	72	0.0580417	0.726771	6.30979	345.252	0.936196
mat_12	wsnp_Ex_c5123_9088111	2B	696677468	2	2.1857	0.119802	0.271707	0.185755	0.667761	2.6654	4.25538	0.0427339	73	0.0695813	1.65851	4.94201	344.515	0.936196
mat_12	BobWhite_c10610_1096	4A	686382438	1	2.47476	0.119953	NaN	NaN	NaN	NaN	NaN	NaN	75	0.0273047	0.484459	6.61338	357.114	0.936196
mat_12	wsnp_Ex_c28900_37982485	1A	541999933	2	2.18512	0.119971	0.793837	4.32666	0.0411306	0.0969546	0.00888135	0.925183	72	0.04939	0.102822	7.36814	339.107	0.936196
mat_12	RAC875_c15872_141	4B	140898196	1	2.4884	0.120036	NaN	NaN	NaN	NaN	NaN	NaN	60	0.0391027	1.07306	5.43815	283.14	0.936196
mat_12	RAC875_rep_c106542_272	7D	548804805	2	2.18201	0.120119	0.276821	0.331422	0.566593	2.22927	3.64305	0.0602353	74	0.0669192	1.41375	5.32401	351.976	0.936196
mat_12	BobWhite_c2027_84	1B	640555569	2	2.18276	0.120134	-0.867989	4.26238	0.0425684	-0.350424	0.122019	0.727874	73	0.0500496	0.877106	6.04767	349.46	0.936196
mat_12	wsnp_Ku_c9746_16265584	4A	742566149	2	2.18757	0.120258	-0.517155	0.979657	0.325898	2.67484	2.60026	0.111618	67	0.071419	1.58791	5.56537	323.258	0.936196
mat_12	wsnp_Ku_c10468_17301042	3A	699857900	1	2.4673	0.120503	NaN	NaN	NaN	NaN	NaN	NaN	75	0.0316064	1.59377	5.18481	356.882	0.936196
mat_12	BS00102641_51	3B	723031967	2	2.17833	0.120638	0.905669	4.32525	0.0411121	-0.127618	0.01177	0.913909	73	0.0578933	1.02001	5.85357	347.15	0.936196
mat_12	Excalibur_c7684_54	1B	660531434	2	2.17995	0.120663	0.658011	3.55505	0.0635148	-0.797879	0.533349	0.46764	71	0.0563908	0.596103	6.08037	333.85	0.936196
mat_12	wsnp_Ex_c33012_41567026	4A	739525478	2	2.17752	0.12073	0.482707	1.04763	0.309479	2.53926	2.56829	0.113404	73	0.0610958	1.53638	4.92048	343.782	0.936196
mat_12	GENE-1787_339	3A	514311658	2	2.17643	0.120854	-0.766269	1.41918	0.237451	-4.15168	3.87994	0.0527138	73	0.0498625	1.00502	5.88832	346.6	0.936196
mat_12	Excalibur_c14594_182	5B	38157606	2	2.17415	0.121013	-0.856374	2.16327	0.145641	2.77412	3.37479	0.0702713	74	0.0939607	2.06127	4.61906	355.379	0.936196
mat_12	wsnp_Ex_c2573_4788116	5D	52616199	2	2.17298	0.121247	-0.843543	3.77701	0.0558706	0.805194	0.59732	0.442132	73	0.0699774	1.03144	5.85602	351.416	0.936196
mat_12	wsnp_Ex_c4752_8482625	4A	17265658	2	2.17026	0.121662	0.442191	0.990563	0.322985	-1.83564	4.038	0.0482885	72	0.0545624	1.11509	5.82425	344.112	0.936196
mat_12	Tdurum_contig13646_225	3A	737677121	2	2.16831	0.121886	0.941511	4.3281	0.0410979	0.579851	0.303374	0.583504	72	0.0563171	0.598414	6.52633	343.337	0.936196
mat_12	wsnp_Ex_rep_c68624_67475477	3B	140854732	2	2.1661	0.122037	-0.933351	3.04175	0.0854164	-0.248497	0.0627628	0.802895	73	0.0514489	0.762406	6.06898	343.088	0.936196
mat_12	Excalibur_c54055_694	1D	308455842	2	2.16539	0.122118	-0.509857	0.782269	0.379392	-2.03843	2.32273	0.131876	73	0.0558549	1.2775	5.55218	345.437	0.936196
mat_12	wsnp_Ku_c5560_9853214	1D	408407834	2	2.1686	0.122182	-0.770389	4.24489	0.0431975	-0.192231	0.00981185	0.921386	69	0.050669	0.207227	6.9381	327.503	0.936196
mat_12	GENE-3807_45	6B	634331888	2	2.16517	0.122247	0.904293	3.41422	0.0688025	-0.75515	0.571447	0.452185	72	0.0652877	1.17627	5.20461	339.962	0.936196
mat_12	Tdurum_contig11443_1022	3A	692719049	2	2.16391	0.122499	-0.0565083	0.0131956	0.908876	2.43367	4.2575	0.0427875	71	0.0903943	1.19648	5.80467	340.117	0.936196
mat_12	TA003609-0197	5B	531542624	2	2.17287	0.122584	-0.441894	1.38206	0.244318	2.20054	2.7365	0.103217	62	0.380678	3.08478	2.43117	284.35	0.936196
mat_12	BS00067742_51	4A	16861066	2	2.16216	0.122595	-0.873856	3.8744	0.0529332	0.332432	0.0613506	0.805089	72	0.0829464	1.40478	4.57514	335.289	0.936196
mat_12	IAAV7043	1B	120405675	2	2.16114	0.122608	0.818869	2.61266	0.110387	0.74261	0.530084	0.468933	73	0.0603797	1.36302	5.44385	340.319	0.936196
mat_12	wsnp_Ex_c18965_27868480	6A	429396022	1	2.43975	0.12262	NaN	NaN	NaN	NaN	NaN	NaN	74	0.0587864	1.48952	4.75716	347.103	0.936196
mat_12	Kukri_c17540_394	1B	115278824	2	2.16076	0.122652	-0.723751	2.92331	0.0916153	0.904439	0.579088	0.449155	73	0.051155	0.869314	6.05196	348.599	0.936196
mat_12	Kukri_rep_c92967_369	2B	15882613	1	2.45707	0.122733	NaN	NaN	NaN	NaN	NaN	NaN	56	0.0513743	2.00475	4.16928	263.595	0.936196
mat_12	BS00105878_51	3B	750361290	2	2.15981	0.122763	-0.928632	2.69837	0.104811	-3.33791	2.66825	0.106734	73	0.0686667	1.00634	5.89274	346.806	0.936196
mat_12	Excalibur_c49239_97	6A	439668775	1	2.43754	0.122787	NaN	NaN	NaN	NaN	NaN	NaN	74	0.038483	1.47944	4.79328	347.595	0.936196
mat_12	RAC875_c3672_705	5D	552711350	2	2.15806	0.122864	-1.20367	4.29349	0.0417915	-0.724331	0.126676	0.72293	74	0.0596794	0.670357	6.2649	352.285	0.936196
mat_12	wsnp_Ex_c20386_29451037	2B	390806185	2	2.15804	0.122968	0.734547	4.18033	0.0445528	0.429383	0.178006	0.67435	73	0.0602455	1.01693	5.92523	348.844	0.936196
mat_12	wsnp_Ex_c10596_17293192	1B	678317711	2	2.15708	0.122978	0.360382	0.669373	0.415933	1.80803	2.54023	0.1153	74	0.0538559	0.897845	5.93907	357.036	0.87028
mat_12	Kukri_c59939_94	3D	328697977	2	2.15708	0.122978	0.360382	0.669373	0.415933	1.80803	2.54023	0.1153	74	0.0538559	0.897845	5.93907	357.036	0.936196
mat_12	BS00039145_51	6A	87296939	2	2.15942	0.123018	-0.753358	3.04377	0.0854367	-1.20833	1.5846	0.212281	71	0.101433	2.23351	3.96273	331.68	0.936196
mat_12	BobWhite_rep_c64768_264	2A	711075300	2	2.15611	0.123192	0.14185	0.0491985	0.825092	-3.30746	3.95214	0.0506147	73	0.0589157	1.01217	5.8847	345.233	0.936196
mat_12	BS00063710_51	2B	111663888	2	2.15591	0.123215	-0.884795	4.22084	0.0435607	-0.350449	0.103929	0.748099	73	0.0503279	0.573455	6.496	347.351	0.936196
mat_12	Kukri_c76470_79	7A	19955881	2	2.15379	0.123361	0.549977	1.94286	0.167587	-3.76802	1.99008	0.16258	74	0.0745834	1.02729	5.77529	352.623	0.936196
mat_12	JD_c11099_294	3B	527654382	2	2.15277	0.12348	-0.951533	1.86643	0.176079	-3.26924	3.69967	0.0583231	74	0.0768294	1.04086	5.75401	351.495	0.936196
mat_12	RAC875_rep_c117959_132	5D	517975256	2	2.15353	0.123492	0.725742	2.90322	0.0927155	-1.28564	1.53736	0.219037	73	0.165548	2.07934	4.08975	336.837	0.936196
mat_12	Excalibur_c8188_693	1B	553020360	2	2.15215	0.123653	-0.578077	2.21691	0.140874	-1.57076	1.2993	0.25812	73	0.0563871	0.549063	6.52554	346.502	0.936196
mat_12	Tdurum_contig10036_977	1B	640162601	2	2.1623	0.12366	-0.775932	3.73619	0.0578162	-1.72403	0.460675	0.499835	63	0.0740081	1.03919	5.34242	288.993	0.936196
mat_12	Ra_c26080_461	1B	304543430	2	2.15208	0.123661	0.171302	0.0349331	0.852262	2.48177	2.73354	0.102616	73	0.0874182	1.39023	5.42284	347.238	0.936196
mat_12	Excalibur_c23239_783	2D	602513659	1	2.42613	0.123774	NaN	NaN	NaN	NaN	NaN	NaN	72	0.0335369	0.834963	5.91643	341.555	0.988853
mat_12	TA001999-0466	5D	551085021	2	2.15011	0.123891	-1.13538	3.53677	0.0640666	-1.42482	2.86606	0.0947889	73	0.0499171	0.736844	6.23915	347.989	0.936196
mat_12	TA001028-0737	3B	24007913	2	2.14932	0.124088	0.844158	3.12738	0.0812829	-0.576085	0.365479	0.547406	72	0.0715184	1.49426	4.73861	342.161	0.936196
mat_12	wsnp_Ex_c12119_19382820	5B	410535416	2	2.15502	0.124111	-0.921355	4.21446	0.0441103	-0.726953	0.409507	0.524469	66	0.065344	1.60183	4.79307	311.631	0.936196
mat_12	wsnp_Ex_c47907_52974924	6D	1415202	2	2.14761	0.124184	0.986003	3.07953	0.0835375	1.78734	2.68352	0.105755	73	0.0560918	0.900224	6.00868	346.858	0.987784
mat_12	Tdurum_contig70819_393	6A	615821812	2	2.14624	0.124243	0.753846	3.48812	0.0658249	0.516701	0.243238	0.623357	74	0.052355	0.697785	6.2196	352.571	0.936196
mat_12	BS00105054_51	5B	558625349	2	2.14613	0.124358	-0.819615	3.60954	0.061454	0.291279	0.0727105	0.788202	73	0.0577031	1.28443	5.55955	353.686	0.936196
mat_12	Excalibur_c5182_93	3B	560116702	2	2.14331	0.124689	0.810764	3.28111	0.0742522	-1.38116	1.60691	0.209011	73	0.0628007	0.441546	6.74858	346.39	0.936196
mat_12	IAAV5992	5B	571185826	2	2.14189	0.124856	0.696083	3.36571	0.0706981	-1.25971	1.11516	0.294493	73	0.071855	1.38687	5.42571	353.796	0.936196
mat_12	IAAV5662	3B	39904988	2	2.14129	0.12503	0.606955	2.49775	0.118454	-1.38872	2.17125	0.145032	72	0.0527677	0.555091	6.62335	346.064	0.936196
mat_12	Excalibur_rep_c69868_123	5A	510891340	2	2.13766	0.125255	-0.576787	2.01422	0.160087	-1.04106	1.17719	0.281499	74	0.0537363	0.898924	5.94534	352.373	0.936196
mat_12	wsnp_Ku_c3929_7189422	7A	730431626	2	2.13813	0.1253	0.203896	0.257079	0.613684	2.4144	3.85176	0.0535585	73	0.057137	1.3833	5.42244	347.196	0.936196
mat_12	BS00042105_51	4B	616274476	2	2.13673	0.125365	-0.78341	3.25597	0.0752884	-1.34366	1.75359	0.189557	74	0.0578716	1.0929	5.69137	354.268	0.936196
mat_12	BobWhite_c35398_181	3D	562709323	2	2.1366	0.125381	0.941188	2.06948	0.154546	1.56462	0.83286	0.364451	74	0.0546231	1.1262	5.66413	350.327	0.936196
mat_12	BS00099719_51	5B	580103266	2	2.13643	0.125502	0.689428	1.54624	0.217725	-2.65879	4.14464	0.0454468	73	0.0554738	0.722426	6.31378	346.79	0.936196
mat_12	wsnp_BE499835B_Ta_2_5	5B	20832483	2	2.13154	0.125981	-0.828406	4.20221	0.0439637	0.114287	0.00678669	0.934569	74	0.0531701	0.803322	6.07751	350.164	0.936196
mat_12	wsnp_Ex_c18632_27501724	1D	491034146	2	2.13218	0.126006	-0.512503	1.76016	0.188797	-1.51938	1.69684	0.196853	73	0.0512352	0.304958	6.84325	347.407	0.936196
mat_12	Excalibur_c64287_145	5D	214314636	1	2.39782	0.126014	NaN	NaN	NaN	NaN	NaN	NaN	71	0.0360347	1.34673	5.18195	334.475	0.936196
mat_12	BS00074353_51	5D	550924958	2	2.12984	0.126183	-1.20155	4.25969	0.0425821	-1.00403	0.442929	0.50781	74	0.0486846	0.68655	6.24016	352.022	0.936196
mat_12	BS00025017_51	5D	551059308	2	2.12984	0.126183	-1.20155	4.25969	0.0425821	-1.00403	0.442929	0.50781	74	0.0486846	0.68655	6.24016	352.022	0.936196
mat_12	Excalibur_c15029_144	7B	497883245	2	2.12929	0.12625	-0.713664	2.64052	0.10848	1.21631	1.63528	0.205025	74	0.0533411	0.925225	5.91336	353.276	0.936196
mat_12	BS00068816_51	3B	607812529	2	2.12865	0.126326	0.339476	0.621015	0.433222	1.89861	4.1642	0.0449038	74	0.0521235	1.36595	5.39457	352.515	0.936196
mat_12	wsnp_JD_c5643_6802088	3B	617683064	2	2.12865	0.126326	0.339476	0.621015	0.433222	1.89861	4.1642	0.0449038	74	0.0521235	1.36595	5.39457	352.515	0.936196
mat_12	wsnp_JD_c5643_6802211	3B	617683148	2	2.12865	0.126326	0.339476	0.621015	0.433222	1.89861	4.1642	0.0449038	74	0.0521235	1.36595	5.39457	352.515	0.936196
mat_12	BS00010204_51	3A	477708688	2	2.12688	0.126638	0.52922	1.41758	0.237712	-2.14201	3.78274	0.0556895	73	0.0545516	1.26601	5.35312	345.173	0.936196
mat_12	BS00034085_51	7A	647307696	2	2.12533	0.126723	-0.949532	4.24949	0.0428238	0.441039	0.169366	0.681882	74	0.0495418	1.2975	5.45445	353.969	0.936196
mat_12	BS00067845_51	6D	84935734	2	2.12533	0.126823	0.235453	0.20757	0.65005	3.2435	3.99325	0.04946	73	0.0559162	0.987357	5.92165	346.521	0.936196
mat_12	Kukri_c41694_285	6B	247009201	2	2.12602	0.126845	1.26414	1.59063	0.211365	3.93404	4.13079	0.0458514	72	0.0555081	0.921513	5.80695	343.079	0.936196
mat_12	Tdurum_contig84962_266	7B	84186221	2	2.12494	0.12687	-0.145237	0.0512663	0.821516	-3.31426	3.8984	0.0521683	73	0.0677874	0.931836	6.07742	351.551	0.936196
mat_12	BS00039148_51	4A	641402937	2	2.12128	0.127209	-0.54808	1.12051	0.2933	-1.8496	3.06221	0.0843345	74	0.077554	1.36425	5.45837	351.94	0.936196
mat_12	Tdurum_contig46030_580	1A	565274385	2	2.12141	0.127294	-1.05727	3.85653	0.0534143	-1.59056	1.60282	0.209584	73	0.0517604	1.08837	5.592	342.588	0.936196
mat_12	wsnp_RFL_Contig2402_1924907	5B	701458566	2	2.11846	0.127548	-1.12995	3.57206	0.0627296	-1.74749	2.00973	0.160548	74	0.0492772	0.996842	5.81773	357.843	0.936196
mat_12	Kukri_c11140_323	5D	549855104	2	2.11846	0.127548	-1.12995	3.57206	0.0627296	-1.74749	2.00973	0.160548	74	0.0492772	0.996842	5.81773	357.843	0.936196
mat_12	BS00022522_51	7B	701188172	2	2.11823	0.127576	0.735785	2.51798	0.116877	-1.17449	0.776637	0.381064	74	0.0606312	1.107	5.7239	350.404	0.767935
mat_12	wsnp_Ex_c2920_5385184	1A	593301501	2	2.11766	0.127745	0.946742	1.80594	0.183215	-3.26941	3.64713	0.06015	73	0.0690182	1.09496	5.79037	346.75	0.936196
mat_12	IACX8272	3A	514167614	2	2.11766	0.127745	0.946742	1.80594	0.183215	-3.26941	3.64713	0.06015	73	0.0690182	1.09496	5.79037	346.75	0.936196
mat_12	RAC875_c76528_296	4A	613695507	1	2.3724	0.127763	NaN	NaN	NaN	NaN	NaN	NaN	75	0.0284822	0.792912	6.17503	356.734	0.936196
mat_12	BS00016407_51	3B	50533589	2	2.1163	0.128013	0.87996	3.06197	0.0844648	-1.37817	1.23206	0.270752	72	0.0507671	0.775849	6.1071	343.285	0.936196
mat_12	wsnp_Ex_c27136_36355033	1B	94832096	2	2.11449	0.128028	0.741621	2.85112	0.095578	0.816931	0.571214	0.452209	74	0.0714694	1.24225	5.5114	352.847	0.936196
mat_12	Kukri_c5252_107	3B	53803960	2	2.11597	0.128053	-0.629579	1.77122	0.187489	-1.38782	1.45406	0.231881	72	0.0507917	0.903195	6.10037	342.916	0.936196
mat_12	RAC875_c35723_106	3B	724750575	2	2.11364	0.128131	-0.603732	1.21774	0.273429	-1.15019	1.0671	0.305011	74	0.0536754	0.879048	5.97449	347.94	0.936196
mat_12	wsnp_Ex_c8240_13914674	3A	25359593	2	2.11316	0.128189	-0.381906	0.440228	0.509102	-3.11702	4.22578	0.0433915	74	0.0603823	1.39887	5.338	357.852	0.936196
mat_12	wsnp_Ra_c10203_16850924	3D	386431613	2	2.11359	0.128237	-0.968909	1.92045	0.170084	-3.25389	3.5636	0.0630894	73	0.0659849	0.971398	5.97274	347.53	0.936196
mat_12	BS00065053_51	1B	38833829	2	2.11281	0.128543	0.774018	3.13813	0.080834	-1.10631	0.839013	0.362824	71	0.0578205	0.63005	6.42198	338.058	0.936196
mat_12	RFL_Contig3172_1752	2A	715338766	2	2.10989	0.128586	-1.5548	3.9428	0.0508286	-0.561006	0.126801	0.722799	74	0.0536888	1.27995	5.48881	349.74	0.936196
mat_12	BS00066446_51	7D	232494130	1	2.3608	0.128683	NaN	NaN	NaN	NaN	NaN	NaN	75	0.0358104	0.720578	6.29476	357.242	0.936196
mat_12	Ra_c68984_1882	1B	480974251	2	2.11077	0.1289	0.194104	0.235829	0.628774	2.89163	3.91809	0.0517603	70	0.0583924	1.24368	5.61231	333.841	0.936196
mat_12	TA004946-0577	1B	640560321	2	2.10721	0.129013	-0.856362	4.21186	0.0437787	-0.0186991	0.000348629	0.985155	73	0.0495116	0.749665	6.24379	347.358	0.936196
mat_12	BobWhite_c658_377	5A	594352281	2	2.10383	0.129426	0.987948	2.94753	0.0903081	-1.98595	2.76472	0.100711	73	0.0793833	1.50616	5.29688	346.168	0.936196
mat_12	GENE-0221_721	UN	143903008	1	2.3525	0.129527	NaN	NaN	NaN	NaN	NaN	NaN	72	0.0313089	0.986126	6.04728	344.436	0.936196
mat_12	BS00084133_51	5D	550441903	2	2.10004	0.129789	1.19748	4.20002	0.0440174	-1.00665	0.446229	0.506238	74	0.0499987	0.736503	6.1789	352.176	0.936196
mat_12	Excalibur_c30378_344	5D	552711271	2	2.10004	0.129789	1.19748	4.20002	0.0440174	-1.00665	0.446229	0.506238	74	0.0499987	0.736503	6.1789	352.176	0.936196
mat_12	RAC875_c60360_389	1A	77104964	2	2.10136	0.129831	-0.783788	2.35568	0.129272	0.838819	0.597555	0.442078	72	0.0563815	1.375	5.53355	343.166	0.936196
mat_12	BS00108775_51	2A	718722609	2	2.10035	0.129851	-0.14432	0.0980794	0.755052	1.95151	3.6127	0.0613431	73	0.0669114	1.29583	5.53633	348.783	0.936196
mat_12	BS00040929_51	7A	83936802	2	2.09722	0.130236	-0.298714	0.579558	0.448972	-3.08398	3.81722	0.0546136	73	0.0653666	1.14086	5.7354	347.276	0.936196
mat_12	Tdurum_contig54311_256	6A	582086853	1	2.34139	0.130241	NaN	NaN	NaN	NaN	NaN	NaN	75	0.0309933	0.876374	6.06261	356.76	0.936196
mat_12	wsnp_JD_c14118_13933380	7A	511930942	2	2.09628	0.130351	-0.510428	1.01026	0.318208	2.71339	3.43894	0.0677717	73	0.0965075	0.98181	5.95587	353.034	0.936196
mat_12	Ra_c35412_1057	5B	464595137	2	2.09624	0.130357	-0.160512	0.0970449	0.756305	5.91469	4.17013	0.0448064	73	0.0697155	1.16175	5.57606	345.992	0.936196
mat_12	wsnp_JD_c8919_9843237	7A	513217210	2	2.0958	0.130411	0.51166	1.0124	0.317697	2.709	3.43664	0.0678617	73	0.0523631	1.01418	5.91244	349.023	0.936196
mat_12	BS00063517_51	2D	74938316	2	2.09765	0.130504	0.90271	3.90346	0.0521872	-1.47848	0.945574	0.334245	70	0.0559565	0.785783	6.42342	336.37	0.936196
mat_12	BS00063537_51	1D	487839275	2	2.09412	0.130619	0.902756	4.18271	0.0444938	0.107407	0.00943395	0.922894	73	0.0780535	1.25179	5.46746	345.203	0.936196
mat_12	BS00068331_51	5D	552697649	2	2.08947	0.131298	1.20048	4.16084	0.0450908	-0.736731	0.126996	0.722624	72	0.065531	0.65644	6.47876	344.549	0.936196
mat_12	wsnp_Ku_c10377_17180909	6B	28159983	2	2.08733	0.131358	-0.232436	0.071184	0.790373	3.84779	3.19429	0.078047	74	0.0549747	1.49711	5.22548	352.542	0.936196
mat_12	Kukri_c60627_74	4D	447338417	2	2.08549	0.131587	0.906159	4.1705	0.0447466	-0.667681	0.277151	0.60017	74	0.0677711	0.629759	6.37876	351.896	0.936196
mat_12	Tdurum_contig30517_578	1B	566838407	2	2.08614	0.131608	-0.812826	3.84589	0.053736	-0.515921	0.246946	0.620748	73	0.0486954	0.673356	6.35492	347.01	0.936196
mat_12	RAC875_c52926_871	2B	27728417	2	2.08463	0.131695	0.210333	0.0889573	0.766354	-4.06083	4.05336	0.0477711	74	0.0558061	1.34633	5.39464	352.208	0.936196
mat_12	BS00003839_51	3D	596889932	2	2.08301	0.131896	0.579517	1.6899	0.197703	1.95678	1.82451	0.18095	74	0.068581	1.16739	5.63171	357.097	0.936196
mat_12	RAC875_c19328_236	2A	400982719	2	2.08798	0.132172	0.452697	1.26809	0.264266	-4.4427	2.68571	0.106084	66	0.0658628	1.07933	5.88933	315.471	0.936196
mat_12	wsnp_Ra_c3955_7262354	3D	369405811	2	2.08063	0.132194	-0.153908	0.128202	0.721336	1.92386	4.0665	0.047421	74	0.051726	1.16631	5.61812	352.455	0.936196
mat_12	Kukri_c12562_453	5D	397622429	2	2.07959	0.132424	-0.228601	0.292395	0.590359	2.61919	3.23904	0.076092	73	0.0827157	1.6925	4.97072	346.246	0.936196
mat_12	Tdurum_contig15285_588	7A	18874228	2	2.08049	0.132633	-0.413463	1.12725	0.292065	-1.95758	3.56197	0.0633243	70	0.052687	1.20215	5.71196	334.302	0.936196
mat_12	Excalibur_c2311_2260	2D	640216160	2	2.07602	0.132976	0.0603579	0.00604241	0.938259	-4.34704	3.77393	0.0560234	72	0.0574175	1.10445	5.72612	341.78	0.936196
mat_12	TA014111-0612	2B	122265952	1	2.31152	0.132988	NaN	NaN	NaN	NaN	NaN	NaN	70	0.0326635	0.730161	6.72104	337.856	0.936196
mat_12	BS00065633_51	6A	526119436	2	2.07301	0.133149	-0.561149	1.06939	0.304496	-3.22986	3.76086	0.0563305	74	0.054666	1.27837	5.48041	351.626	0.936196
mat_12	BS00009807_51	2B	52669947	2	2.0736	0.133177	0.291258	0.391345	0.533571	1.89488	2.75295	0.101425	73	0.0563028	1.21091	5.6125	346.613	0.936196
mat_12	wsnp_Ku_c16938_25916260	1B	109728193	2	2.07253	0.13321	1.08709	4.01943	0.0486878	-1.18438	0.8404	0.362301	74	0.0826165	1.28822	5.46409	352.911	0.936196
mat_12	tplb0030f06_593	2B	780821722	2	2.07409	0.133219	-0.278903	0.404239	0.526952	2.22531	3.40213	0.0692838	72	0.0582245	1.39518	5.518	346.37	0.936196
mat_12	Kukri_c26517_691	7A	539325537	2	2.0725	0.133316	-0.621734	1.71658	0.194299	1.29109	1.63822	0.204679	73	0.0524525	0.694371	6.36563	345.188	0.936196
mat_12	Tdurum_contig49753_191	3B	21002854	2	2.0733	0.133319	1.02913	3.93974	0.0510226	-1.38979	0.951635	0.332615	72	0.0478527	0.537962	6.50284	343.949	0.936196
mat_12	Kukri_c73802_205	6D	3942436	2	2.07481	0.133345	-1.00933	3.10811	0.0823311	0.650598	0.225378	0.636471	70	0.0546253	0.819178	6.0178	334.084	0.936196
mat_12	Tdurum_contig42584_1100	7B	750589089	2	2.07259	0.133407	0.718693	4.11854	0.0461654	-0.400927	0.125704	0.72398	72	0.046886	0.417982	6.50178	341.724	0.936196
mat_12	IAAV6424	2B	691780616	2	2.07151	0.133544	0.176637	0.169215	0.682049	1.7603	3.95037	0.0507189	72	0.062871	1.22787	5.7125	345.912	0.936196
mat_12	BS00022537_51	5D	550441913	2	2.06585	0.134055	1.19205	4.11418	0.046174	-0.734179	0.131442	0.717989	74	0.046788	0.835587	6.05999	349.397	0.936196
mat_12	wsnp_Ex_c6057_10611952	6B	119978660	2	2.0646	0.134315	0.835951	2.69346	0.105122	-0.554546	0.286827	0.593912	73	0.0625181	1.21715	5.6477	345.692	0.936196
mat_12	wsnp_Ex_c34597_42879718	6A	597859019	2	2.06492	0.134378	-1.01417	3.34041	0.0717994	1.87353	0.905307	0.344591	72	0.0635292	0.509093	6.43978	342.187	0.936196
mat_12	RAC875_c195_499	4B	285579822	2	2.06452	0.134429	-0.962838	4.04186	0.0481844	-1.79935	0.394214	0.532107	72	0.0538926	0.893131	6.1107	344.751	0.936196
mat_12	BobWhite_c11503_296	6B	662105631	2	2.062	0.134544	1.18748	3.36228	0.0707819	-2.03784	1.91682	0.170426	74	0.0606598	0.92756	5.9198	354.277	0.936196
mat_12	RFL_Contig5337_1453	1D	446265348	2	2.0651	0.134573	1.18936	4.13018	0.045976	1.08332	0.502723	0.480695	70	0.0806406	1.68869	4.70077	328.993	0.936196
mat_12	Ex_c25689_1606	1A	432974867	2	2.06161	0.134594	0.855847	4.0259	0.0485116	0.266008	0.102795	0.749417	74	0.0488573	0.573815	6.4155	352.612	0.936196
mat_12	Ex_c12584_2014	1A	435061794	2	2.06161	0.134594	0.855847	4.0259	0.0485116	0.266008	0.102795	0.749417	74	0.0488573	0.573815	6.4155	352.612	0.936196
mat_12	wsnp_Ex_c10257_16825240	1A	436422939	2	2.06161	0.134594	0.855847	4.0259	0.0485116	0.266008	0.102795	0.749417	74	0.0488573	0.573815	6.4155	352.612	0.936196
mat_12	Excalibur_s113043_59	3A	61308296	2	2.06514	0.134917	0.610652	1.7568	0.189594	-1.65319	2.41269	0.125138	67	0.0541772	1.41488	5.54338	316.971	0.936196
mat_12	RFL_Contig5290_1493	2B	200385432	2	2.05832	0.135014	-1.10912	1.84962	0.178013	1.21322	0.550553	0.460473	74	0.0697756	1.25415	5.51713	351.418	0.936196
mat_12	GENE-2472_462	7B	82691922	1	2.28287	0.135068	NaN	NaN	NaN	NaN	NaN	NaN	75	0.0321746	1.17415	5.68451	356.756	0.936196
mat_12	wsnp_Ex_c42836_49314564	7A	515006429	2	2.05932	0.135092	0.521728	1.02897	0.313845	2.69994	3.60349	0.0617234	72	0.0524209	1.15085	5.77686	343.594	0.936196
mat_12	wsnp_RFL_Contig4134_4692458	2D	348285921	2	2.0569	0.135196	0.638163	1.54805	0.217403	1.47843	1.3045	0.257125	74	0.0464273	0.599446	6.37823	351.411	0.936196
mat_12	TA016532-0794	3A	694982686	1	2.2813	0.135319	NaN	NaN	NaN	NaN	NaN	NaN	73	0.0354537	1.12745	5.64661	346.112	0.936196
mat_12	wsnp_Ex_c11350_18330107	6B	595287690	2	2.05482	0.135463	0.319412	0.501419	0.481132	-2.39484	4.05509	0.0477247	74	0.0497263	1.23526	5.53251	348.351	0.936196
mat_12	Kukri_c27673_289	2B	17787241	2	2.05549	0.135478	-0.822055	4.10839	0.0463746	-0.28315	0.102396	0.749899	73	0.0480527	0.468636	6.64115	349.653	0.936196
mat_12	Ku_c766_2284	4A	27673612	2	2.05934	0.135536	-0.893524	3.68524	0.0591556	0.277407	0.0321631	0.858212	68	0.0609341	0.622606	6.85715	328.03	0.936196
mat_12	BobWhite_c18136_441	6D	464985604	2	2.05575	0.135548	-1.70348	3.96342	0.0503488	-0.902436	0.173382	0.678379	72	0.0644699	0.793103	6.27614	344.292	0.936196
mat_12	wsnp_Ku_c19251_28705893	7D	439718876	2	2.05636	0.135687	-0.0325605	0.00683949	0.934329	-2.2129	4.01334	0.0490709	70	0.0478993	0.819196	6.06011	333.706	0.936196
mat_12	BS00060596_51	2A	766393587	2	2.05634	0.135689	0.19512	0.152652	0.697217	-1.92368	3.53332	0.0643698	70	0.0643703	1.37968	5.27329	332.301	0.936196
mat_12	BS00062645_51	3D	355428471	2	2.05298	0.135903	0.571982	1.73301	0.192261	-1.9684	3.11296	0.0819727	72	0.0571567	1.20492	5.70846	343.777	0.936196
mat_12	BobWhite_c11540_60	3B	452103394	2	2.04837	0.136291	-0.956719	3.45414	0.0671248	-1.39821	1.90532	0.171696	74	0.0478014	0.619442	6.35083	352.912	0.936196
mat_12	GENE-0925_515	2A	656820557	2	2.04816	0.136319	-0.0842624	0.0381625	0.84566	-3.89342	4.09036	0.0467926	74	0.0565441	1.3381	5.42363	350.818	0.936196
mat_12	Ra_c106922_296	4B	612846807	2	2.04732	0.136529	0.849158	3.53427	0.0641587	-1.08995	1.27587	0.262417	73	0.05729	1.17943	5.64675	348.866	0.936196
mat_12	Ra_c106922_266	4B	612846837	2	2.04732	0.136529	0.849158	3.53427	0.0641587	-1.08995	1.27587	0.262417	73	0.05729	1.17943	5.64675	348.866	0.936196
mat_12	Ex_c14755_1362	2D	20769481	2	2.0492	0.136721	0.265266	0.538052	0.465763	-2.27211	3.72569	0.0577533	69	0.050048	1.24659	5.40081	328.95	0.936196
mat_12	BS00023196_51	6B	35633329	2	2.05045	0.136795	-0.536243	1.37866	0.24455	-1.50096	2.02498	0.159441	67	0.0509415	0.763311	6.39568	318.347	0.936196
mat_12	BobWhite_rep_c65082_84	2B	44352799	2	2.04374	0.136992	-0.814936	3.35075	0.0713128	-1.61719	2.0238	0.15917	73	0.0596752	0.990191	5.9332	346.793	0.936196
mat_12	BS00021972_51	7B	556456363	2	2.04275	0.137224	-0.307807	0.490052	0.486192	1.99687	3.92853	0.0513451	72	0.0519929	0.913453	6.06491	343.751	0.936196
mat_12	RAC875_c15975_1208	1A	533902881	2	2.0423	0.13739	-0.789642	4.06695	0.0475679	0.248875	0.0604577	0.806494	71	0.0474044	0.47091	6.82888	339.401	0.936196
mat_12	BS00010992_51	1B	122356231	2	2.03992	0.137488	0.756892	2.50022	0.118213	1.21898	0.886166	0.349666	73	0.0482762	0.947289	5.9632	347.249	0.936196
mat_12	RAC875_c9415_1229	6D	400071237	2	2.03862	0.137557	-0.712714	1.24565	0.268046	-2.40956	4.00148	0.0491802	74	0.0597031	1.09537	5.7066	351.826	0.936196
mat_12	Excalibur_c20196_503	2D	29844435	2	2.03924	0.137577	0.404604	0.484218	0.488758	3.22285	4.03658	0.0482738	73	0.0613385	1.46726	5.15182	342.836	0.936196
mat_12	Excalibur_rep_c113131_624	4D	4978283	2	2.03875	0.137641	-1.12939	3.54419	0.0637949	-3.16803	1.18426	0.28012	73	0.0481986	0.640732	6.39312	342.567	0.936196
mat_12	Tdurum_contig44328_448	2B	17779319	2	2.04139	0.137731	-0.39229	0.56198	0.456049	-1.22619	3.17028	0.0794565	69	0.0504031	0.681786	6.62307	326.433	0.936196
mat_12	wsnp_CAP8_c1240_753371	5B	26950889	2	2.0354	0.137976	1.10563	1.84673	0.178348	1.20126	0.535381	0.466696	74	0.0606368	1.18492	5.64098	352.284	0.936196
mat_12	BS00086534_51	2D	635950378	2	2.03528	0.137992	-0.53676	0.719167	0.399189	-4.02055	3.96065	0.0503211	74	0.0470228	0.850588	6.02924	352.196	0.936196
mat_12	RAC875_c60563_531	2A	80592153	2	2.03457	0.138085	1.04632	2.4178	0.124288	-3.33139	2.67806	0.106044	74	0.061486	1.04732	5.77069	352.454	0.936196
mat_12	wsnp_Ra_c2633_5017265	1D	8610041	2	2.03437	0.13811	-0.488514	1.42379	0.236644	1.70916	3.21813	0.0769679	74	0.0561425	0.9526	5.89053	352.181	0.936196
mat_12	wsnp_Ex_c8188_13842273	1D	410464592	2	2.03302	0.138287	-0.682096	2.95092	0.0900681	-0.72528	0.508113	0.478229	74	0.0476892	0.539346	6.47753	354.57	0.936196
mat_12	Tdurum_contig82438_73	7A	54997203	2	2.03226	0.138489	0.439734	1.04309	0.310524	-1.69025	3.6786	0.0590814	73	0.0616789	1.17499	5.70968	345.981	0.936196
mat_12	RAC875_c26460_807	2B	412665167	2	2.03162	0.138676	-1.65436	3.58561	0.062357	1.87586	1.5304	0.220128	72	0.127141	1.67192	5.19921	346.443	0.936196
mat_12	RAC875_c13610_1239	6A	1497847	2	2.02862	0.138865	0.242312	0.10795	0.743431	-2.93085	3.72143	0.0576057	74	0.0737523	1.58572	5.14361	352.818	0.936196
mat_12	RAC875_c29004_652	7B	603821339	2	2.02861	0.138867	0.414403	0.250351	0.618333	-2.74209	3.57706	0.0625503	74	0.0495844	0.951585	5.90178	353.256	0.936196
mat_12	BobWhite_rep_c64068_241	2B	775336370	2	2.02741	0.139126	-0.443779	0.641567	0.425779	-2.46707	4.05472	0.0477862	73	0.052262	1.05393	5.81099	345.2	0.936196
mat_12	BS00065036_51	2B	26581552	2	2.02712	0.139267	1.39556	2.61116	0.11055	-0.248213	0.0299044	0.863199	72	0.0552134	1.10697	5.91223	341.322	0.936196
mat_12	RAC875_c110838_690	2A	712721666	1	2.23568	0.139289	NaN	NaN	NaN	NaN	NaN	NaN	72	0.0321598	0.869188	6.04975	342.93	0.936196
mat_12	RAC875_c17197_504	2B	30325385	1	2.23079	0.139595	NaN	NaN	NaN	NaN	NaN	NaN	74	0.0363442	0.861153	6.19542	353.962	0.936196
mat_12	BS00073670_51	5A	570716220	2	2.02156	0.139797	-1.08623	1.83701	0.179481	1.13603	0.495919	0.483539	74	0.0517812	1.15572	5.63429	361.024	0.936196
mat_12	Tdurum_contig68980_317	1D	474822683	2	2.02091	0.139984	0.717832	3.72936	0.0574011	-0.250021	0.0696194	0.792646	73	0.0472293	0.634474	6.39456	341.045	0.936196
mat_12	BS00064536_51	1A	16389593	2	2.0197	0.140145	0.216774	0.302686	0.583906	-2.07224	4.00894	0.0490269	73	0.16305	2.01414	4.0821	341.519	0.936196
mat_12	Tdurum_contig11126_182	6B	149616898	2	2.01935	0.140295	0.941519	2.78099	0.0997944	2.25161	2.63171	0.109182	72	0.0648928	1.13734	5.84645	343.72	0.936196
mat_12	BS00003891_51	6A	24067812	1	2.23032	0.14048	NaN	NaN	NaN	NaN	NaN	NaN	62	0.0307085	1.07922	6.03711	297.779	0.936196
mat_12	RAC875_c43360_456	7B	697077980	1	2.22031	0.140573	NaN	NaN	NaN	NaN	NaN	NaN	73	0.042675	1.01327	6.03061	349.174	0.936196
mat_12	BobWhite_c14689_172	5A	616879504	2	2.0155	0.140602	1.71389	3.86429	0.053128	-2.22274	1.83198	0.18007	74	0.0496548	1.17714	5.60872	357.162	0.936196
mat_12	Kukri_c1214_948	4A	619283152	2	2.0164	0.140688	0.0339566	0.00820982	0.928059	-1.6873	4.03206	0.0484492	72	0.0583474	1.34793	5.58975	343.854	0.936196
mat_12	RFL_Contig4591_1759	3D	2141392	2	2.01481	0.140795	-0.256061	0.451621	0.503717	-1.95275	3.5732	0.062744	73	0.0531472	1.41097	5.46007	344.596	0.936196
mat_12	BS00009342_51	5A	665596906	2	2.01499	0.140982	0.0795366	0.0347878	0.852581	-1.85777	3.94518	0.0509225	71	0.116869	1.88448	5.0957	336.165	0.936196
mat_12	Kukri_rep_c103845_165	2B	131575297	2	2.01186	0.141088	-0.997464	2.13831	0.147952	-2.35245	3.41134	0.0688025	74	0.0522927	1.20718	5.57344	353.347	0.936196
mat_12	wsnp_Ex_c3907_7088011	3B	737764103	2	2.01222	0.141142	1.33516	1.76808	0.187817	1.21477	0.424902	0.516577	73	0.0588931	1.36819	5.46626	345.069	0.936196
mat_12	Tdurum_contig29629_437	6A	550738241	2	2.01058	0.14126	0.57947	0.859646	0.356893	-3.31527	3.86303	0.0531658	74	0.0519742	1.40321	5.34153	346.234	0.936196
mat_12	RAC875_c35094_476	1D	50296771	2	2.0108	0.141332	0.933735	3.86704	0.0530985	1.26147	1.00808	0.318726	73	0.0611628	0.721519	6.3003	347.9	0.936196
mat_12	BS00009287_51	4A	617231374	2	2.01113	0.141391	-1.1482	4.01557	0.0488984	-1.12047	0.312629	0.577831	72	0.0496962	0.562427	6.26935	333.607	0.936196
mat_12	Kukri_c8390_1102	1A	6323655	2	2.00938	0.141626	-0.338801	0.876509	0.352333	3.46458	3.09779	0.0827057	72	0.0606803	1.49378	5.19147	343.348	0.936196
mat_12	Ku_c47803_245	7D	549545851	2	2.00932	0.141634	-0.713261	2.99238	0.0880025	1.41677	1.77823	0.186629	72	0.0478215	0.910343	6.14646	344.504	0.936196
mat_12	BobWhite_s67247_276	6A	582253736	2	2.00781	0.141732	0.163933	0.103765	0.748291	2.35216	3.10468	0.082312	73	0.0785393	1.16338	5.68448	348.584	0.936196
mat_12	TA006276-0443	6B	258011887	2	2.00666	0.141785	1.30776	1.67323	0.199904	3.52859	3.93898	0.0509379	74	0.0480116	0.955668	5.89279	354.556	0.936196
mat_12	BS00090277_51	6B	470800894	2	2.00666	0.141785	1.30776	1.67323	0.199904	3.52859	3.93898	0.0509379	74	0.0480116	0.955668	5.89279	354.556	0.936196
mat_12	RAC875_c6538_123	2B	13166058	2	2.00733	0.142007	-0.288167	0.483355	0.489208	-1.51035	3.33789	0.0719643	71	0.0685992	1.16985	5.54571	331.648	0.936196
mat_12	wsnp_Ex_c11813_18968198	3D	424011387	2	2.00641	0.142024	0.124408	0.0907335	0.764127	2.39277	3.48777	0.0659515	72	0.0534932	1.26551	5.46771	342.148	0.936196
mat_12	wsnp_Ex_rep_c68480_67305954	6B	259292478	2	2.00411	0.142128	-1.30869	1.66361	0.201188	3.51692	3.93614	0.0510194	74	0.0484783	1.06948	5.75754	352.371	0.936196
mat_12	BS00067873_51	6B	261585632	2	2.00411	0.142128	-1.30869	1.66361	0.201188	3.51692	3.93614	0.0510194	74	0.0484783	1.06948	5.75754	352.371	0.936196
mat_12	wsnp_Ra_c16850_25605248	6B	262473178	2	2.00411	0.142128	-1.30869	1.66361	0.201188	3.51692	3.93614	0.0510194	74	0.0484783	1.06948	5.75754	352.371	0.936196
mat_12	tplb0031i24_1212	7A	723296503	2	2.00362	0.142194	-0.433934	0.739114	0.39276	1.93801	2.52849	0.116129	74	0.105896	1.26739	5.51107	352.784	0.936196
mat_12	IAAV2840	1D	408535081	2	2.00581	0.142212	-0.643769	3.10747	0.0822989	-1.23439	0.613543	0.436099	71	0.0470192	0.463719	6.7633	338.675	0.936196
mat_12	Ex_c24379_1031	6A	550954915	2	2.00277	0.142309	-0.587129	0.887442	0.349278	-3.30865	3.83454	0.0540283	74	0.0824062	1.34188	5.41367	352.789	0.936196
mat_12	Ra_c11721_766	6A	550955740	2	2.00277	0.142309	-0.587129	0.887442	0.349278	-3.30865	3.83454	0.0540283	74	0.0824062	1.34188	5.41367	352.789	0.936196
mat_12	CAP8_c2277_179	4A	614106741	2	2.00358	0.142405	0.598107	2.0961	0.152077	-1.89449	2.70835	0.104245	72	0.0472435	0.787355	6.28361	342.094	0.936196
mat_12	RAC875_c6701_291	1B	520785524	2	2.00361	0.142507	0.332481	0.52241	0.472223	1.92555	3.63031	0.0608441	71	0.098444	2.83791	3.58201	318.659	0.936196
mat_12	D_GDS7LZN01CBWNE_99	5D	546700351	2	2.00142	0.142592	0.82167	2.7932	0.0990062	1.90764	2.33522	0.130858	73	0.0574238	0.719662	6.30529	346.062	0.936196
mat_12	Tdurum_contig6121_947	6B	157475427	2	2.00063	0.142699	-1.31379	1.63973	0.204473	3.61644	3.92806	0.0513046	73	0.070325	1.06373	5.93362	347.148	0.936196
mat_12	wsnp_Ra_c16476_25132652	4A	629860680	2	2.00029	0.142745	1.39624	3.98447	0.0497041	0.902205	0.099034	0.753902	73	0.0524082	0.901819	6.07336	345.343	0.936196
mat_12	wsnp_JD_c4438_5568170	5D	546689137	2	1.99928	0.142781	-0.862564	3.19709	0.0779192	1.67376	2.06417	0.155069	74	0.0599089	0.542109	6.48458	353.065	0.936196
mat_12	BS00062715_51	1A	344250076	2	1.99869	0.14286	-0.772343	2.17332	0.144723	-2.52243	2.85874	0.0951445	74	0.0674351	1.04936	5.77871	352.938	0.936196
mat_12	Tdurum_contig5352_556	7B	5061909	2	1.99997	0.142892	0.454349	1.6046	0.209392	2.67732	2.0106	0.160577	72	0.0515738	1.16169	5.80543	346.448	0.936196
mat_12	Kukri_c27172_757	6D	381346547	2	1.99859	0.142976	-1.29845	1.63607	0.204973	3.70676	3.88503	0.0525628	73	0.0487809	0.83127	6.15702	344.365	0.936196
mat_12	RAC875_c15518_236	2A	762286148	2	1.99724	0.143058	0.543638	0.727638	0.39644	-3.9604	3.87478	0.0528143	74	0.0673189	0.981921	5.86786	349.739	0.936196
mat_12	wsnp_Ex_rep_c67786_66472676	3A	653242838	2	1.99722	0.143161	-0.418177	0.246183	0.621287	-1.89372	1.76984	0.187601	73	0.0516839	1.13498	5.74697	347.189	0.936196
mat_12	RAC875_rep_c73201_205	2A	80591835	2	1.99707	0.143182	-0.953358	1.97334	0.164394	-2.873	3.02595	0.0862159	73	0.0559275	1.23661	5.40779	344.835	0.936196
mat_12	RAC875_c3397_1492	2A	715336360	2	1.99623	0.143194	-0.689085	1.74333	0.190843	-2.90505	3.10898	0.0820463	74	0.0469996	0.901711	5.97922	355.788	0.936196
mat_12	BS00048090_51	7B	498970808	2	1.99675	0.143329	-0.600468	1.40023	0.240632	1.68684	1.94553	0.167418	72	0.0533055	0.962686	5.83406	349.092	0.936196
mat_12	Excalibur_c2484_1329	2A	726422125	2	1.99769	0.143418	0.619765	0.624113	0.43223	4.85133	3.87003	0.0531773	70	0.166613	2.77286	3.33644	328.765	0.936196
mat_12	Excalibur_c21898_1423	1B	1421158	2	1.99474	0.143498	-0.271847	0.405488	0.526288	2.54649	3.06742	0.0841348	73	0.052396	1.14815	5.73932	346.377	0.936196
mat_12	Excalibur_c34574_452	6A	449693203	2	1.99341	0.143577	-1.29044	2.93244	0.091061	2.62211	2.45434	0.121525	74	0.0522679	1.02812	5.83815	356.402	0.936196
mat_12	Ku_c27617_684	5D	492721477	2	1.99374	0.143633	-0.162734	0.0314221	0.8598	2.67081	2.72388	0.103213	73	0.0590956	1.37859	5.48334	357.603	0.936196
mat_12	JD_c1314_1184	7A	706832130	2	1.9936	0.143756	-0.0431943	0.00947838	0.922717	1.77649	3.95477	0.0505938	72	0.0524862	1.39819	5.52168	344.567	0.936196
mat_12	Excalibur_rep_c67100_1541	6D	462630011	2	1.99021	0.144014	-0.88616	1.45028	0.232373	1.65879	0.91752	0.341289	74	0.0502464	0.641337	6.36382	356.637	0.936196
mat_12	IAAV8836	5D	320310376	2	1.99024	0.144111	-0.631339	2.56967	0.113309	1.39934	2.14509	0.147379	73	0.0505153	1.15051	5.72507	347.588	0.936196
mat_12	GENE-0527_92	1A	531605184	2	1.9894	0.144124	0.732616	3.96138	0.0503003	-0.352243	0.166023	0.684863	74	0.0461002	0.200648	7.03518	353.625	0.936196
mat_12	Tdurum_contig49651_227	1B	627946367	2	1.98848	0.14425	0.6337	1.51493	0.222339	1.89604	3.21689	0.0770234	74	0.0464813	1.02232	5.82364	358.109	0.936196
mat_12	Kukri_c49280_230	3A	20134735	2	1.98832	0.144478	-0.382942	0.749237	0.389633	2.28982	3.84194	0.0539109	72	0.0475372	1.25295	5.67263	344.251	0.936196
mat_12	RAC875_c31031_387	1B	587984724	1	2.17683	0.144652	NaN	NaN	NaN	NaN	NaN	NaN	70	0.0290018	0.544972	6.70062	336.24	0.936196
mat_12	Kukri_c53398_200	1D	47713814	2	1.98552	0.144656	-1.03437	3.8511	0.053525	0.328993	0.0472501	0.828526	74	0.0480391	0.544639	6.4839	354.144	0.936196
mat_12	wsnp_CAP8_c458_368125	1D	49422506	2	1.98552	0.144656	-1.03437	3.8511	0.053525	0.328993	0.0472501	0.828526	74	0.0480391	0.544639	6.4839	354.144	0.936196
mat_12	BS00024262_51	1D	49596665	2	1.98552	0.144656	-1.03437	3.8511	0.053525	0.328993	0.0472501	0.828526	74	0.0480391	0.544639	6.4839	354.144	0.936196
mat_12	BS00031658_51	1D	55670946	2	1.98552	0.144656	-1.03437	3.8511	0.053525	0.328993	0.0472501	0.828526	74	0.0480391	0.544639	6.4839	354.144	0.936196
mat_12	RAC875_c17951_108	4D	326973571	2	1.98552	0.144656	-1.03437	3.8511	0.053525	0.328993	0.0472501	0.828526	74	0.0480391	0.544639	6.4839	354.144	0.987784
mat_12	wsnp_CAP7_c888_455397	2D	14778614	2	1.98525	0.144693	0.652652	1.49305	0.225675	-2.8341	3.57177	0.0627401	74	0.0453147	0.97073	5.88411	352.046	0.936196
mat_12	Excalibur_c94139_55	1A	1211689	2	1.9835	0.145138	0.00112385	2.29563e-06	0.998795	3.91481	3.41461	0.0687872	72	0.0545563	0.871153	6.20629	340.834	0.936196
mat_12	BobWhite_c32938_177	2B	715599546	2	1.98413	0.145268	-0.774587	3.94317	0.0510369	0.267504	0.0692904	0.793157	70	0.085219	1.24214	5.28324	332.914	0.936196
mat_12	Kukri_c5528_603	1A	546520018	2	1.98177	0.145272	-0.819237	2.75479	0.101313	1.90627	2.32262	0.131886	73	0.0469628	0.741449	6.31512	346.494	0.936196
mat_12	BS00079676_51	5D	546652067	2	1.98177	0.145272	-0.819237	2.75479	0.101313	1.90627	2.32262	0.131886	73	0.0469628	0.741449	6.31512	346.494	0.936196
mat_12	wsnp_JD_c4438_5567834	5D	546689473	2	1.98177	0.145272	-0.819237	2.75479	0.101313	1.90627	2.32262	0.131886	73	0.0469628	0.741449	6.31512	346.494	0.936196
mat_12	BS00088587_51	5D	546689902	2	1.98177	0.145272	-0.819237	2.75479	0.101313	1.90627	2.32262	0.131886	73	0.0469628	0.741449	6.31512	346.494	0.936196
mat_12	wsnp_Ra_c33025_41968284	1A	504243945	1	2.16668	0.145328	NaN	NaN	NaN	NaN	NaN	NaN	74	0.0243933	0.763198	6.27773	353.338	0.936196
mat_12	BS00074432_51	6A	535894664	2	1.98014	0.145396	0.575723	0.95574	0.331491	-3.26409	3.72895	0.0573603	74	0.079822	1.19301	5.59844	352.452	0.936196
mat_12	GENE-4923_506	7A	6497516	2	1.97941	0.145497	-0.722353	2.10557	0.151047	1.58033	0.890926	0.34834	74	0.0472671	0.898224	5.97253	352.478	0.936196
mat_12	Kukri_rep_c101980_524	7B	480328438	2	1.98067	0.145527	1.11913	3.30133	0.0734442	0.17426	0.0239647	0.877414	72	0.0993745	1.74259	4.51415	338.313	0.936196
mat_12	RAC875_c65419_229	2D	61234349	1	2.16137	0.145757	NaN	NaN	NaN	NaN	NaN	NaN	75	0.0302924	0.988192	5.93488	358.198	0.936196
mat_12	Tdurum_contig61884_836	7B	716041122	2	1.97732	0.145785	0.525713	1.75944	0.188829	1.391	2.6306	0.109133	74	0.0532499	1.07293	5.74827	352.04	0.936196
mat_12	BS00063458_51	7A	642736978	2	1.97672	0.145869	-0.762264	1.52697	0.22053	-3.34801	2.96549	0.0892935	74	0.0618673	1.17561	5.61936	352.141	0.936196
mat_12	Tdurum_contig31218_279	4A	743948834	2	1.97764	0.145946	0.223038	0.216198	0.643375	1.98403	3.00706	0.0872427	72	0.063955	1.71599	5.09884	342.491	0.936196
mat_12	wsnp_BE637808A_Ta_2_1	4A	567668361	2	1.97681	0.145957	0.763101	3.86388	0.0531933	-0.739284	0.421838	0.518088	73	0.059144	1.10419	5.78509	345.243	0.936196
mat_12	D_GA8KES401AL4GG_122	5D	546653435	2	1.97423	0.146214	-0.757405	2.70155	0.104551	1.86474	2.29283	0.134291	74	0.0514924	0.786984	6.12748	352.776	0.936196
mat_12	BobWhite_c23455_184	7D	568754338	2	1.9745	0.146277	0.980254	3.71304	0.0579356	1.23568	1.22017	0.273005	73	0.0458392	0.657164	6.24757	347.199	0.936196
mat_12	IAAV8779	UN	309683226	2	1.97335	0.146336	0.948968	2.11233	0.150403	2.12738	3.02281	0.086317	74	0.0469136	0.898331	5.97569	353.601	0.936196
mat_12	Tdurum_contig47071_1322	5B	600187536	2	1.97225	0.146488	0.29394	0.17631	0.675797	-5.90607	3.9291	0.0512218	74	0.0609634	1.49457	5.29824	351.931	0.936196
mat_12	Kukri_c3866_1768	4A	743950293	2	1.97265	0.146534	-0.309847	0.470118	0.495135	1.80589	2.74057	0.102183	73	0.0464778	1.30243	5.55336	347.788	0.936196
mat_12	wsnp_Ku_c3953_7233359	6A	5872745	1	2.15159	0.146717	NaN	NaN	NaN	NaN	NaN	NaN	74	0.033	0.55443	6.65457	348.985	0.936196
mat_12	Kukri_c900_1334	UN	30196858	2	1.97207	0.146718	-0.309603	0.593093	0.44378	-1.91408	3.68823	0.0588145	72	0.0689111	1.54748	5.34237	344.622	0.936196
mat_12	BS00065152_51	6B	656997347	2	1.96911	0.146925	-0.659981	3.09839	0.0825584	1.16197	1.03201	0.313043	74	0.0529731	1.12868	5.68677	348.86	0.936196
mat_12	BS00091766_51	2D	647278275	2	1.96905	0.146934	-0.944725	2.07045	0.154452	2.12853	3.05028	0.0849298	74	0.0476221	1.04141	5.78716	352.357	0.936196
mat_12	BS00043286_51	4A	7404898	2	1.96732	0.147175	-0.680961	3.18372	0.0785305	0.482166	0.249452	0.618963	74	0.0432102	0.343197	6.79773	352.893	0.936196
mat_12	Kukri_c6128_373	6B	634334201	2	1.968	0.147181	-0.875712	3.08915	0.0830662	-0.646166	0.448651	0.505119	73	0.0803784	1.79286	4.4137	340.667	0.936196
mat_12	Excalibur_c687_886	5D	546688548	2	1.9663	0.147318	0.85527	3.12134	0.0814531	1.66729	2.05532	0.155945	74	0.0436718	0.591974	6.411	351.802	0.936196
mat_12	Kukri_c7786_81	5D	546689187	2	1.9663	0.147318	0.85527	3.12134	0.0814531	1.66729	2.05532	0.155945	74	0.0436718	0.591974	6.411	351.802	0.936196
mat_12	wsnp_CAP11_rep_c4300_2030261	6B	117841129	1	2.14884	0.147355	NaN	NaN	NaN	NaN	NaN	NaN	68	0.0354987	0.631232	6.66221	326.637	0.936196
mat_12	RAC875_c32895_304	7A	233335097	2	1.96599	0.147462	-0.865897	2.01093	0.160483	-3.51308	3.20046	0.0778234	73	0.0495645	0.588745	6.50629	363.064	0.936196
mat_12	wsnp_JD_c2198_3021879	5A	670407096	2	1.96475	0.147534	-0.607623	1.77439	0.186983	1.10002	1.04229	0.31066	74	0.0463175	0.806274	6.10199	351.166	0.936196
mat_12	Ra_c105904_1191	2B	790754649	2	1.96748	0.147574	-0.653256	1.4181	0.237797	4.65172	3.09706	0.0828661	70	0.178432	2.02673	4.62469	332.242	0.936196
mat_12	BS00068310_51	7B	624784101	2	1.96505	0.147594	-0.733528	3.76639	0.056208	-0.782927	0.0952428	0.758506	73	0.0841886	1.25326	5.00917	335.227	0.936196
mat_12	Excalibur_rep_c103301_387	7A	608398530	2	1.96436	0.147793	0.266996	0.212524	0.646205	2.257	3.89668	0.052273	72	0.0460213	0.811677	6.14831	342.185	0.936196
mat_12	Kukri_c37241_513	7D	5049477	2	1.96227	0.147882	1.27646	3.54129	0.0638452	0.0352292	0.000583461	0.980795	74	0.0507019	1.20422	5.58838	352.287	0.995012
mat_12	TA006177-1779	6B	228975751	1	2.14089	0.147894	NaN	NaN	NaN	NaN	NaN	NaN	71	0.0360669	0.915316	6.2202	339.741	0.936196
mat_12	Kukri_c26576_329	2D	79987796	1	2.13773	0.147948	NaN	NaN	NaN	NaN	NaN	NaN	75	0.0263851	0.890644	6.07008	357.165	0.936196
mat_12	wsnp_Ex_c8913_14881924	4B	46609121	2	1.96079	0.14809	0.181357	0.0526545	0.819149	2.4608	3.44162	0.0676112	74	0.0699223	1.45903	5.32917	352.619	0.936196
mat_12	Tdurum_contig49804_392	3B	4141944	2	1.96377	0.148093	-0.781227	1.1023	0.297426	-3.28066	3.78176	0.0558913	70	0.0680947	1.50031	5.19865	332.317	0.936196
mat_12	GENE-4235_196	6A	22023149	2	1.95902	0.148338	-1.27523	3.53461	0.0640904	0.0343037	0.000552408	0.981313	74	0.0629942	1.19255	5.60737	352.509	0.936196
mat_12	wsnp_Ku_c17618_26749729	6B	236477381	2	1.95902	0.148338	-1.27523	3.53461	0.0640904	0.0343037	0.000552408	0.981313	74	0.0629942	1.19255	5.60737	352.509	0.936196
mat_12	RFL_Contig22_617	1A	503379773	2	1.96097	0.148376	0.666798	3.83639	0.0541365	0.56286	0.291794	0.590788	71	0.0695445	1.30076	4.84334	330.697	0.936196
mat_12	Tdurum_contig30989_79	2B	97189764	2	1.9602	0.148485	0.165586	0.0578593	0.810615	-5.71419	3.68057	0.059129	71	0.0584215	1.65983	5.12699	337.761	0.936196
mat_12	Excalibur_c15048_488	2D	60946875	2	1.95679	0.148653	-0.723003	3.52358	0.0644974	-0.684475	0.473282	0.493662	74	0.0458092	0.972077	5.88287	351.867	0.936196
mat_12	Kukri_c11959_587	7B	700818531	2	1.96024	0.148817	0.447375	1.45543	0.231901	-3.98901	2.21156	0.141672	68	0.0469746	0.653094	6.13697	322.425	0.936196
mat_12	RAC875_c66200_288	7A	704792448	2	1.95742	0.148876	-0.672138	3.0231	0.0864828	-1.53692	1.08184	0.301865	71	0.0582601	1.3982	5.51076	339.476	0.936196
mat_12	BobWhite_c13202_312	5D	418071063	1	2.12713	0.148943	NaN	NaN	NaN	NaN	NaN	NaN	75	0.0248039	0.960898	5.9694	357.203	0.936196
mat_12	D_contig16084_234	2D	14778928	2	1.96013	0.148954	0.683463	1.48867	0.226765	-2.92919	3.54133	0.064268	67	0.0560823	1.09823	6.18699	323.052	0.936196
mat_12	wsnp_Ex_c7844_13341797	5D	247612193	2	1.95436	0.149098	-0.5786	0.951644	0.332567	-3.26208	3.67502	0.059202	73	0.0471235	1.20898	5.67323	347.167	0.936196
mat_12	RAC875_c64253_666	5A	564175895	2	1.95448	0.149291	-0.856808	3.32535	0.0724886	-1.17719	1.20836	0.275424	71	0.055217	1.40594	5.19367	338.03	0.936196
mat_12	wsnp_Ku_c16895_25861847	7B	645124632	2	1.95295	0.149296	1.06228	3.73147	0.0573323	1.22522	1.15373	0.286357	73	0.051071	0.710149	6.29632	347.403	0.936196
mat_12	wsnp_Ra_rep_c74968_72704437	3D	427227532	2	1.95257	0.14935	-0.578811	1.69694	0.196839	2.06234	1.6164	0.207687	73	0.0462824	1.05259	5.84576	347.413	0.936196
mat_12	BS00070580_51	1A	544170085	2	1.95098	0.149475	-0.290763	0.60503	0.439179	1.653	2.84637	0.0958496	74	0.0452992	1.02393	5.81484	355.019	0.936196
mat_12	BS00080318_51	2B	763842505	2	1.95095	0.149479	-0.795746	2.16977	0.145046	1.89805	3.20286	0.0776569	74	0.102796	1.63587	5.14285	352.716	0.936196
mat_12	wsnp_Ex_c31900_40635609	2A	504076176	2	1.95129	0.149532	0.114605	0.0326371	0.857144	3.95129	3.72508	0.0575406	73	0.0577284	1.91354	4.89458	344.996	0.936196
mat_12	RAC875_c1227_1098	7A	582635949	2	1.95482	0.149583	0.211425	0.146776	0.702848	2.17242	3.30115	0.0737041	68	0.0909624	1.27649	5.3563	321.663	0.936196
mat_12	wsnp_Ra_c39562_47242455	5B	580103343	2	1.94998	0.149617	0.675273	1.49728	0.225025	-2.44873	3.75795	0.0564234	74	0.0571473	0.715214	6.26728	349.769	0.936196
mat_12	BobWhite_c2568_115	6A	535402652	2	1.94992	0.149626	-0.62751	1.17642	0.281655	-3.21975	3.54842	0.063585	74	0.0480306	0.858353	6.037	355.566	0.936196
mat_12	wsnp_BE403818A_Ta_2_1	6A	536216940	2	1.94992	0.149626	-0.62751	1.17642	0.281655	-3.21975	3.54842	0.063585	74	0.0480306	0.858353	6.037	355.566	0.936196
mat_12	IACX3586	6A	536254402	2	1.94992	0.149626	-0.62751	1.17642	0.281655	-3.21975	3.54842	0.063585	74	0.0480306	0.858353	6.037	355.566	0.936196
mat_12	IACX6046	6A	538056638	2	1.94992	0.149626	-0.62751	1.17642	0.281655	-3.21975	3.54842	0.063585	74	0.0480306	0.858353	6.037	355.566	0.936196
mat_12	wsnp_Ra_c11269_18309313	6A	539649418	2	1.94992	0.149626	-0.62751	1.17642	0.281655	-3.21975	3.54842	0.063585	74	0.0480306	0.858353	6.037	355.566	0.936196
mat_12	TA020776-0309	6D	38773229	2	1.94892	0.149868	0.342594	0.5459	0.4624	3.29936	3.66079	0.0596834	73	0.075336	1.34912	5.50057	346.805	0.987784
mat_12	Excalibur_c19547_128	4B	621326949	2	1.94873	0.149896	-0.738103	3.10628	0.0822348	-1.31509	1.47212	0.228977	73	0.0514936	1.05289	5.86929	347.251	0.936196
mat_12	RAC875_c6135_95	3D	153169612	2	1.94779	0.149928	-0.727683	2.14974	0.146888	-0.682401	0.553984	0.459083	74	0.0831045	1.5442	5.19616	352.728	0.936196
mat_12	wsnp_Ex_rep_c66846_65240088	6D	383746659	2	1.94841	0.149941	-0.840996	3.75385	0.0566088	0.341549	0.156216	0.693833	73	0.0457745	0.675282	6.37766	347.666	0.936196
mat_12	RAC875_c4190_337	1B	632005730	2	1.94888	0.150195	-0.955532	3.62967	0.060926	-0.977088	0.576697	0.450196	70	0.051983	0.748405	6.5004	335.882	0.936196
mat_12	BS00022950_51	2B	44404903	2	1.94136	0.151051	0.821949	3.4093	0.0689979	-1.60877	1.50147	0.224495	72	0.0608661	0.965606	6.05775	342.115	0.936196
mat_12	BS00065722_51	1D	50969969	1	2.10287	0.151306	NaN	NaN	NaN	NaN	NaN	NaN	74	0.0273452	1.03347	5.9685	354.33	0.936196
mat_12	Ku_c915_507	5A	568269334	2	1.938	0.15175	0.960182	3.86755	0.0532517	-0.450572	0.182779	0.670327	70	0.0586794	1.32176	5.84156	337.112	0.936196
mat_12	BS00087451_51	6A	535404340	1	2.09855	0.15178	NaN	NaN	NaN	NaN	NaN	NaN	73	0.0472093	1.0164	5.87853	346.432	0.936196
mat_12	Tdurum_contig42858_1256	UN	397893956	2	1.93419	0.151876	0.504622	0.816394	0.369209	-3.20908	3.65963	0.0596683	74	0.0831708	1.26758	5.52279	351.665	0.936196
mat_12	D_contig79290_372	3D	29706607	2	1.93474	0.151899	0.608506	1.58806	0.211673	-1.46742	1.49605	0.225268	73	0.0695136	1.0517	5.86652	339.323	0.936196
mat_12	BS00066278_51	1A	544431310	2	1.93516	0.151942	-0.0835623	0.0374615	0.847081	1.84854	3.83147	0.0542304	72	0.0809806	2.00915	4.1432	337.622	0.936196
mat_12	Excalibur_c53799_458	5B	623117398	2	1.93407	0.152098	0.875096	3.51957	0.0647589	0.106479	0.00651262	0.935907	72	0.0445368	0.356333	6.92429	344.364	0.936196
mat_12	Excalibur_c14943_695	1A	361511837	2	1.934	0.152109	-0.935547	3.19676	0.0780513	0.122368	0.0111092	0.916356	72	0.047231	0.643523	6.5142	346.071	0.936196
mat_12	wsnp_Ex_c3738_6809767	7B	706814550	2	1.94079	0.152215	0.794028	3.5953	0.0626054	-0.931766	0.899981	0.34647	63	0.105027	2.81549	2.56107	287.327	0.936196
mat_12	BS00097863_51	7B	708951793	2	1.93222	0.152263	-0.377578	0.744321	0.391145	1.90467	3.75854	0.0564585	73	0.0496467	1.03073	5.8742	347.571	0.936196
mat_12	wsnp_BE403154A_Ta_2_1	6A	581892296	2	1.93002	0.15258	0.657634	3.04932	0.0850361	1.14939	0.991775	0.322644	73	0.0468376	1.04187	5.89137	347.772	0.936196
mat_12	wsnp_Ex_rep_c109138_92064554	7B	560531189	2	1.92995	0.152591	0.59214	1.48024	0.22771	1.67353	3.06465	0.0842718	73	0.0710316	1.31008	5.51691	343.573	0.936196
mat_12	Excalibur_c39303_144	5A	536817639	2	1.93105	0.152865	0.38662	0.673457	0.414717	4.6598	2.92816	0.0916051	69	0.0628811	1.52644	5.20292	331.423	0.936196
mat_12	RAC875_c24047_284	1B	547593401	1	2.08392	0.153077	NaN	NaN	NaN	NaN	NaN	NaN	75	0.0336676	0.776993	6.22179	356.608	0.936196
mat_12	BS00110075_51	5A	549800698	2	1.92643	0.153102	0.470135	0.544304	0.463052	-5.30623	3.72963	0.0573921	73	0.0610379	0.866561	6.11272	347.664	0.936196
mat_12	CAP8_c5043_190	2A	677911968	2	1.92682	0.153149	0.957141	3.66102	0.0597321	1.02571	0.264058	0.608942	72	0.0527503	0.937874	6.06811	344.07	0.936196
mat_12	RAC875_c51781_795	3A	1307674	2	1.92485	0.15323	0.188382	0.257134	0.613625	-1.93318	3.56905	0.0628379	74	0.061964	1.23585	5.554	352.404	0.936196
mat_12	IAAV9104	7D	9309500	2	1.92608	0.153255	-0.573138	1.49878	0.224906	1.34581	1.39506	0.241494	72	0.0467146	0.776709	6.35537	345.047	0.936196
mat_12	wsnp_Ex_c13409_21124830	5B	133593744	2	1.93308	0.153325	-0.662736	3.03655	0.0863673	-1.45484	1.19244	0.279062	63	0.0613999	0.944614	5.76512	293.144	0.936196
mat_12	wsnp_Ku_c21021_30712963	6A	544151390	2	1.92629	0.153441	-0.201422	0.257428	0.61351	-1.97687	3.76907	0.0562933	70	0.0484582	1.011	6.14671	334.5	0.936196
mat_12	Tdurum_contig27888_760	2A	156366698	1	2.07836	0.153619	NaN	NaN	NaN	NaN	NaN	NaN	75	0.0278289	1.02115	5.8999	357.069	0.963713
mat_12	Tdurum_contig55841_351	3D	587441671	2	1.92278	0.153633	0.775253	2.72979	0.102847	-0.646309	0.321264	0.572612	73	0.0461415	1.13593	5.72976	343.818	0.936196
mat_12	wsnp_Ex_c44049_50205457	1A	337677533	2	1.92406	0.153657	-0.848136	2.4258	0.123862	0.717977	0.352153	0.554809	71	0.0462345	0.792621	6.29322	338.672	0.936196
mat_12	Tdurum_contig29967_456	5A	607836986	2	1.92092	0.153804	-0.484696	0.42294	0.517515	-5.82162	3.78604	0.0555319	74	0.0571644	0.991912	5.86152	348.546	0.936196
mat_12	wsnp_Ex_rep_c71217_70021470	7A	316014024	1	2.07545	0.153962	NaN	NaN	NaN	NaN	NaN	NaN	74	0.0312881	1.05357	5.95039	354.343	0.936196
mat_12	Excalibur_c18182_760	6B	201222973	2	1.91928	0.154043	-0.915259	1.5018	0.224334	3.13976	3.61276	0.0612861	74	0.0580673	1.03869	5.81946	351.778	0.936196
mat_12	Ra_c9608_183	6A	584678556	1	2.07567	0.15406	NaN	NaN	NaN	NaN	NaN	NaN	72	0.0292047	1.06247	6.03902	345.63	0.936196
mat_12	Ku_c3895_2991	7A	40989632	1	2.07363	0.154082	NaN	NaN	NaN	NaN	NaN	NaN	75	0.0268707	1.04699	5.8809	356.633	0.936196
mat_12	Kukri_c15768_68	7D	550216751	2	1.91923	0.154151	0.65912	2.71932	0.103497	1.40427	1.71222	0.194859	73	0.0443059	0.739882	6.29314	343.277	0.936196
mat_12	RAC875_c28178_889	4A	28563624	2	1.91882	0.154211	0.867357	3.45323	0.0672161	0.00657655	3.16555e-05	0.995526	73	0.0628216	1.14113	5.77751	347.136	0.936196
mat_12	Excalibur_c7971_1573	2A	759813601	2	1.91846	0.154265	-0.912547	1.94166	0.167775	-2.6317	3.42996	0.0681234	73	0.0502217	0.848957	6.04232	346.232	0.936196
mat_12	TA001167-0831	2A	765710060	2	1.91735	0.154327	-0.239362	0.233691	0.630247	-3.20166	3.79996	0.0550958	74	0.0522856	1.35434	5.41647	352.695	0.936196
mat_12	GENE-0676_322	2B	801222295	2	1.91735	0.154327	-0.239362	0.233691	0.630247	-3.20166	3.79996	0.0550958	74	0.0522856	1.35434	5.41647	352.695	0.936196
mat_12	wsnp_Ex_c8400_14157318	7B	701872066	2	1.9167	0.154523	0.774415	3.65605	0.0598449	0.969754	0.877183	0.352105	73	0.0469122	1.62116	5.21152	348.428	0.936196
mat_12	BS00067620_51	1D	42095364	2	1.91358	0.154879	1.02077	3.68845	0.0586966	0.276313	0.0333418	0.85562	74	0.0524789	0.641287	6.34539	352.336	0.936196
mat_12	wsnp_CAP8_c458_368155	1D	49422476	2	1.91358	0.154879	1.02077	3.68845	0.0586966	0.276313	0.0333418	0.85562	74	0.0524789	0.641287	6.34539	352.336	0.936196
mat_12	RAC875_c48997_1160	1D	49422555	2	1.91358	0.154879	1.02077	3.68845	0.0586966	0.276313	0.0333418	0.85562	74	0.0524789	0.641287	6.34539	352.336	0.936196
mat_12	Kukri_c6167_1271	1D	49604298	2	1.91358	0.154879	1.02077	3.68845	0.0586966	0.276313	0.0333418	0.85562	74	0.0524789	0.641287	6.34539	352.336	0.936196
mat_12	wsnp_Ex_c14009_21899923	7A	270753511	2	1.91317	0.15504	-1.51121	3.25536	0.0753724	-2.90367	2.17397	0.144723	73	0.0503783	0.969268	5.9828	347.523	0.936196
mat_12	BobWhite_c5419_643	1D	41581293	2	1.91174	0.155151	1.01725	3.69306	0.0585427	0.265926	0.0239077	0.877547	74	0.048542	0.610418	6.3897	351.488	0.936196
mat_12	wsnp_Ex_c3405_6252997	6B	462131943	2	1.9128	0.155199	1.06185	3.29906	0.0735408	-2.08482	1.57233	0.213982	72	0.0452272	0.666916	6.23215	342.263	0.974811
mat_12	BS00107795_51	6B	156267553	2	1.91123	0.155226	-1.33631	1.73085	0.19242	3.35152	3.74823	0.0567357	74	0.0514655	1.11851	5.70249	352.575	0.936196
mat_12	wsnp_Ex_rep_c102044_87297599	6D	80523679	2	1.91104	0.155254	1.3356	1.73051	0.192462	3.35377	3.74769	0.0567529	74	0.0503127	1.09696	5.73088	350.984	0.936196
mat_12	RAC875_c5129_280	6B	663676294	2	1.91102	0.155257	1.17671	3.06411	0.0842405	2.28526	1.87208	0.175434	74	0.0504151	1.01282	5.83481	355.438	0.936196
mat_12	wsnp_Ku_c21275_31007309	5A	565550080	2	1.91136	0.155308	0.687136	2.59797	0.111376	-1.23477	1.52424	0.220994	73	0.0626106	1.09592	5.82069	348.654	0.936196
mat_12	Kukri_rep_c104648_106	6A	33954815	2	1.91044	0.155343	-0.426884	1.30235	0.257515	-1.26581	2.17004	0.145021	74	0.0461686	0.848416	6.06348	349.495	0.936196
mat_12	RAC875_c29455_79	6A	550282443	2	1.91007	0.155397	-0.524784	0.898214	0.346388	-3.18564	3.56735	0.0628991	74	0.0815487	1.10372	5.73341	352.219	0.936196
mat_12	tplb0035a03_368	6A	550284004	2	1.91007	0.155397	-0.524784	0.898214	0.346388	-3.18564	3.56735	0.0628991	74	0.0815487	1.10372	5.73341	352.219	0.936196
mat_12	BS00089181_51	7B	553628452	2	1.90972	0.155449	0.39487	0.742709	0.391617	1.80507	3.50944	0.0650233	74	0.0511082	1.035	5.84118	352.189	0.936196
mat_12	RAC875_c10174_268	5B	488016433	2	1.91065	0.155516	0.268318	0.187758	0.666102	2.89772	3.79436	0.0553797	72	0.0554335	0.786257	5.81635	339.44	0.936196
mat_12	GENE-1737_27	3B	723444978	2	1.90848	0.155733	0.59218	2.07348	0.154213	1.43859	1.41827	0.2376	73	0.0467904	0.879022	6.09914	347.415	0.936196
mat_12	BobWhite_rep_c48956_706	6A	149925782	2	1.90839	0.155746	0.991213	2.3656	0.12842	-2.0319	3.01933	0.0865533	73	0.0465138	0.942877	6.04715	347.374	0.936196
mat_12	RAC875_c19303_228	5D	501514195	2	1.90775	0.155841	-0.5445	0.597404	0.4421	1.82946	1.66973	0.200427	73	0.06705	1.25292	5.60916	346.914	0.936196
mat_12	IAAV1179	5A	536814182	2	1.90678	0.155985	0.695591	2.90846	0.0924272	1.42386	1.37047	0.245592	73	0.0439984	0.746698	6.07708	349.776	0.936196
mat_12	Tdurum_contig42093_1170	7A	538783800	2	1.9081	0.155999	0.761507	2.59493	0.111706	0.774366	0.523084	0.471939	71	0.0468551	0.897958	6.2428	336.321	0.936196
mat_12	GENE-4826_641	7B	61557731	2	1.90712	0.156038	-0.804046	1.38796	0.242683	-2.37441	1.3448	0.250074	72	0.0508245	1.25966	5.7128	344.604	0.936196
mat_12	Ku_c1575_338	5D	197421015	2	1.90636	0.156048	0.615973	2.31655	0.132384	1.33408	1.25843	0.265676	73	0.0686907	1.30958	5.55657	339.444	0.936196
mat_12	BS00068817_51	3B	607812568	2	1.90613	0.156081	-0.346476	0.628174	0.43063	1.90027	3.72202	0.0576406	73	0.0629285	1.52162	5.26869	347.229	0.936196
mat_12	wsnp_Ex_c41048_47969948	1D	216762	2	1.90522	0.156216	-1.01833	2.98419	0.088369	0.838443	0.247168	0.620591	73	0.044492	1.49433	5.21467	344.697	0.936196
mat_12	BobWhite_rep_c64766_352	2A	711075300	2	1.90093	0.156853	0.658217	2.78765	0.0993359	0.604525	0.468229	0.496	73	0.0455208	0.979465	5.97437	348.051	0.936196
mat_12	wsnp_Ex_c19982_29009504	3B	232634790	2	1.90012	0.156874	0.912705	3.05934	0.0844774	0.6839	0.463525	0.498135	74	0.0450774	1.00586	5.85424	350.176	0.936196
mat_12	BS00070538_51	7A	126907769	2	1.8993	0.157096	0.323435	0.762317	0.385507	-2.14481	2.54351	0.115129	73	0.106159	1.77109	4.88948	341.549	0.936196
mat_12	GENE-1805_65	3D	422479594	2	1.89797	0.157296	0.714286	1.23689	0.269771	-2.32877	3.69793	0.0584351	73	0.0504725	1.14795	5.67643	345.446	0.936196
mat_12	IACX10520	5D	546689938	2	1.89825	0.157357	0.846858	2.99947	0.0876344	1.84074	1.83351	0.180008	72	0.059938	0.528235	6.68451	344.252	0.936196
mat_12	BS00067003_51	1B	39545380	2	1.89642	0.157426	0.805042	3.29672	0.0735249	-0.539769	0.269169	0.605459	74	0.050703	0.745063	6.20391	349.526	0.936196
mat_12	Kukri_c60966_261	6B	719509426	2	1.89514	0.157618	0.44435	0.174929	0.676996	-5.97366	3.77871	0.0557631	74	0.093036	1.35906	5.5502	352.503	0.936196
mat_12	wsnp_BE497469B_Ta_2_1	3B	237107013	2	1.89464	0.157794	-0.920609	3.07879	0.0835737	0.666426	0.433431	0.51241	73	0.0613173	0.99112	5.95337	347.199	0.936196
mat_12	Kukri_c3168_521	3B	147683163	2	1.89336	0.157886	-0.750729	3.64982	0.0600032	0.548707	0.457841	0.500773	74	0.0500623	0.466685	6.62458	353.713	0.936196
mat_12	GENE-4927_846	3D	560107907	2	1.8932	0.157908	-0.657984	2.71539	0.103682	-0.738536	0.639982	0.426313	74	0.0473919	0.595708	6.42406	352.581	0.936196
mat_12	TA006649-0689	6D	58448393	2	1.89275	0.157977	-0.18025	0.240088	0.625612	-1.93588	3.52876	0.0643058	74	0.0513327	1.0454	5.79829	348.193	0.936196
mat_12	TA002070-0603-w	3B	761005153	1	2.03364	0.158114	NaN	NaN	NaN	NaN	NaN	NaN	74	0.0358515	1.53579	5.36453	353.967	0.936196
mat_12	wsnp_Ex_rep_c68193_66971396	3B	730286003	2	1.89169	0.158135	-0.546607	2.0534	0.156136	1.45155	1.47293	0.228796	74	0.0526668	0.938087	5.94395	352.346	0.936196
mat_12	BS00039210_51	2D	74981531	2	1.89126	0.1582	0.866845	3.00184	0.0873932	-1.7341	1.68051	0.198941	74	0.0454006	0.961892	5.90709	352.447	0.936196
mat_12	Tdurum_contig55610_784	2A	42475903	2	1.89021	0.158358	-0.641131	2.71628	0.103627	1.05034	0.883464	0.350354	74	0.0499208	1.07419	5.76793	352.662	0.936196
mat_12	wsnp_Ex_c6381_11093111	4B	652775800	2	1.88917	0.158615	0.213195	0.12339	0.726412	-1.85378	2.68172	0.10587	73	0.0561572	2.61303	4.20677	337.072	0.936196
mat_12	wsnp_BE488779D_Ta_1_2	2D	76639718	2	1.88966	0.158646	-0.281356	0.472867	0.493912	1.91955	2.86581	0.094864	72	0.0522185	1.66133	4.88972	341.007	0.936196
mat_12	TA013009-0365	3D	463689438	2	1.8879	0.158707	1.17054	3.76121	0.0563192	-1.09859	0.416859	0.520533	74	0.0548174	1.24088	5.5704	355.195	0.936196
mat_12	RAC875_c51691_82	2A	769221746	2	1.88795	0.158903	0.0507677	0.00430971	0.947842	-2.44018	2.94358	0.0905807	72	0.0540479	1.00922	5.86751	338.936	0.936196
mat_12	BS00072296_51	3A	655649652	2	1.88828	0.15896	1.20572	3.26216	0.0751944	-2.21408	1.27072	0.263481	71	0.0829278	1.67531	4.61008	332.574	0.936196
mat_12	Kukri_c15205_882	6D	460746155	2	1.88656	0.159009	0.234276	0.345154	0.558707	-1.9402	3.69909	0.0583966	73	0.0586637	1.1865	5.66921	344.561	0.936196
mat_12	BobWhite_c40633_308	5A	570934223	2	1.88559	0.159056	0.223309	0.185068	0.668321	-2.02594	3.771	0.0560075	74	0.0460517	1.00849	5.85121	352.18	0.936196
mat_12	RAC875_c15713_943	5A	447536744	2	1.88789	0.159128	0.755762	3.76067	0.0565615	-0.0882204	0.00604183	0.938268	70	0.392685	2.67516	3.72479	318.584	0.936196
mat_12	Tdurum_contig30576_247	5B	684579281	1	2.02319	0.159231	NaN	NaN	NaN	NaN	NaN	NaN	73	0.0324141	1.28133	5.51766	347.355	0.936196
mat_12	GENE-0638_677	2D	593274764	1	2.02321	0.15929	NaN	NaN	NaN	NaN	NaN	NaN	72	0.0264497	0.730922	6.56919	346.022	0.936196
mat_12	Excalibur_c9183_1397	7D	13010963	2	1.88538	0.159292	0.20851	0.239245	0.62626	-1.74392	3.21792	0.077094	72	0.0723999	1.17308	5.82519	336.477	0.936196
mat_12	BS00110445_51	3B	559894444	2	1.88462	0.159303	-0.791174	3.13151	0.0810268	-1.21378	1.27984	0.261682	73	0.0435839	0.475909	6.63142	344.59	0.936196
mat_12	RAC875_c25339_200	5A	571683234	2	1.88328	0.159405	-0.220751	0.180053	0.672576	-2.02192	3.76606	0.0561646	74	0.0463169	1.05344	5.78762	352.314	0.936196
mat_12	Kukri_c5967_586	5D	452679413	2	1.88328	0.159405	-0.220751	0.180053	0.672576	-2.02192	3.76606	0.0561646	74	0.0463169	1.05344	5.78762	352.314	0.936196
mat_12	RFL_Contig2736_827	1D	420547380	2	1.88369	0.159443	0.104941	0.0577726	0.810735	1.95115	3.64465	0.0602349	73	0.055132	1.40714	5.31467	345.167	0.936196
mat_12	Kukri_c5113_1082	1D	47878735	2	1.88366	0.159449	-0.977582	3.67734	0.0591237	0.0274981	0.000183523	0.989229	73	0.0455492	0.631138	6.46456	347.879	0.936196
mat_12	Ra_c455_283	1B	117180060	2	1.88292	0.159561	0.671625	2.15966	0.146032	0.971417	0.735502	0.393951	73	0.050961	0.9715	5.79595	345.587	0.936196
mat_12	CAP7_c10038_214	7A	570123755	2	1.88219	0.159671	-0.400331	0.616268	0.435013	2.27064	3.26321	0.0750292	73	0.047777	0.86292	5.91597	345.477	0.936196
mat_12	wsnp_Ex_c4996_8885500	7A	538782771	2	1.8809	0.159867	-0.717178	2.42969	0.123442	0.81495	0.694048	0.407546	73	0.0425814	0.805615	6.21023	347.323	0.936196
mat_12	tplb0034p10_1134	1B	656235192	2	1.8795	0.160081	-0.992967	3.47707	0.0663006	-0.578883	0.314256	0.57682	73	0.0498226	0.920152	6.05537	347.807	0.936196
mat_12	IAAV6519	4A	559045946	2	1.87924	0.16012	-0.241045	0.365493	0.547372	-1.98435	3.68691	0.0588025	73	0.0563739	0.705415	6.31468	355.001	0.936196
mat_12	Kukri_c13912_1543	6D	462629990	2	1.87605	0.160506	0.581826	1.60861	0.208717	1.10408	1.05359	0.30807	74	0.0513168	0.95845	5.91373	358.336	0.936196
mat_12	Excalibur_c65796_394	2D	573843531	1	2.00728	0.160742	NaN	NaN	NaN	NaN	NaN	NaN	75	0.0276538	0.997424	5.93311	357.125	0.936196
mat_12	BobWhite_c11154_279	5B	585751973	2	1.87403	0.160814	0.143206	0.0647264	0.799891	-5.79029	3.73719	0.0570924	74	0.0486632	1.37884	5.44203	352.187	0.936196
mat_12	IAAV902	3A	574256873	2	1.87899	0.160824	-0.702828	2.66257	0.107497	-1.20765	0.98756	0.323969	67	0.0536521	1.66843	5.53522	322.609	0.936196
mat_12	wsnp_Ex_c55777_58153636	5A	594576720	2	1.87413	0.1609	1.02147	3.09629	0.0827186	-1.57836	1.78567	0.185662	73	0.0591962	1.5099	5.32968	349.07	0.936196
mat_12	BS00079989_51	UN	222090817	2	1.87248	0.161051	-0.30591	0.439496	0.509454	1.66157	2.66598	0.106821	74	0.0567939	1.65327	5.11047	351.786	0.936196
mat_12	BS00022176_51	1B	636737918	2	1.86847	0.161666	0.611627	1.28235	0.261169	2.05456	3.01328	0.0868041	74	0.076546	1.09016	5.75484	352.622	0.936196
mat_12	IAAV1683	1B	640156882	2	1.8682	0.161912	-0.720726	3.12172	0.081553	-0.689663	0.490186	0.486132	72	0.0579951	1.43828	4.87305	332.987	0.936196
mat_12	Tdurum_contig93532_89	1B	640559394	2	1.86866	0.162057	0.768321	3.47014	0.0667433	-0.457648	0.171536	0.680035	70	0.0490913	0.725715	5.96802	331.385	0.936196
mat_12	IACX5717	5D	559896008	2	1.86161	0.162725	0.917703	3.69266	0.0585563	1.09011	0.312102	0.578103	74	0.0472783	0.964516	5.90956	352.306	0.936196
mat_12	Excalibur_c14273_1407	3B	232604356	2	1.86289	0.162731	0.921121	3.02069	0.0865441	0.669252	0.433132	0.512584	72	0.0552726	1.07397	5.94899	344.685	0.936196
mat_12	Tdurum_contig42528_884	4A	580489444	2	1.86139	0.16276	-0.0514109	0.0154056	0.901562	-2.15197	3.70325	0.0582045	74	0.0505596	1.45333	5.31459	352.712	0.936196
mat_12	IAAV5550	7A	716246532	2	1.86316	0.163017	0.239629	0.362466	0.549142	-2.2484	3.5259	0.0647062	69	0.0680001	1.09846	6.19845	331.587	0.936196
mat_12	Excalibur_c20459_1081	6A	609449288	2	1.85967	0.163026	0.772427	1.21884	0.273215	1.69502	1.02372	0.314981	74	0.0730064	1.25897	5.54865	349.814	0.936196
mat_12	tplb0062k24_584	3A	432441	2	1.86092	0.163036	-0.188702	0.25349	0.616187	-2.04225	3.46322	0.0668883	72	0.0581792	1.16704	5.83359	344.911	0.936196
mat_12	Kukri_c106476_350	7A	62529096	2	1.86087	0.163044	0.419481	0.657657	0.420099	2.08291	3.4296	0.0681954	72	0.0709963	0.878544	5.98903	343.022	0.936196
mat_12	BS00072193_51	1D	50706059	2	1.85979	0.163212	-0.926168	3.6995	0.0584392	0.975635	0.516166	0.474839	72	0.0480978	0.880359	6.16824	345.151	0.936196
mat_12	BobWhite_c28133_87	1D	50968943	2	1.85979	0.163212	-0.926168	3.6995	0.0584392	0.975635	0.516166	0.474839	72	0.0480978	0.880359	6.16824	345.151	0.936196
mat_12	D_contig16934_681	1D	52342500	2	1.8584	0.163223	-0.918155	3.65286	0.059899	1.03923	0.764816	0.384694	74	0.0445014	0.99972	5.8736	346.117	0.936196
mat_12	TA001999-1182	5D	551085021	2	1.85938	0.163274	1.27854	3.63356	0.0606735	-0.639273	0.153153	0.696712	72	0.0469976	0.729136	6.41667	344.904	0.936196
mat_12	Ku_c34562_480	1D	220071007	2	1.85796	0.163292	0.716758	2.24961	0.137961	-2.17096	2.68607	0.105532	74	0.0596983	1.05891	5.79667	350.443	0.936196
mat_12	IAAV8692	6D	53570243	2	1.85769	0.163333	-0.67177	0.59837	0.441698	-2.19843	1.67016	0.200313	74	0.0682658	1.31516	5.49413	351.887	0.936196
mat_12	TG0005	4B	623227175	1	1.9826	0.163361	NaN	NaN	NaN	NaN	NaN	NaN	74	0.0327003	1.14046	5.80263	354.132	0.987784
mat_12	TA003248-0911	4B	519608447	2	1.85801	0.163384	0.381609	1.00187	0.320211	1.57816	2.42795	0.123574	73	0.0434003	0.793348	6.2536	347.712	0.936196
mat_12	Kukri_c322_1394	4B	520238709	2	1.85801	0.163384	0.381609	1.00187	0.320211	1.57816	2.42795	0.123574	73	0.0434003	0.793348	6.2536	347.712	0.936196
mat_12	Tdurum_contig28795_273	2B	743746336	2	1.85786	0.163407	-1.03287	3.71363	0.0579162	0.0335113	0.00126733	0.9717	73	0.059061	1.35943	5.5347	347.789	0.936196
mat_12	RAC875_c16419_585	2D	286664720	2	1.85711	0.163424	1.00104	3.56696	0.0629129	-0.373491	0.0575361	0.811106	74	0.045175	0.845687	6.0703	348.022	0.936196
mat_12	TA011702-0795	2D	441528475	1	1.97924	0.163657	NaN	NaN	NaN	NaN	NaN	NaN	75	0.0252661	0.96427	5.99127	357.083	0.936196
mat_12	Excalibur_c96483_102	7A	610209034	2	1.85687	0.163664	0.389693	0.461056	0.499339	2.09456	3.692	0.0586886	72	0.0458617	0.626263	6.56469	341.004	0.936196
mat_12	RFL_Contig5744_821	6D	471071024	2	1.85722	0.163716	-0.784183	3.35837	0.0711172	0.437225	0.167172	0.683886	71	0.0432781	0.769921	6.40759	340.646	0.936196
mat_12	Kukri_c45512_193	1A	533902104	2	1.85176	0.164258	0.746025	3.69122	0.0586042	0.155983	0.0317298	0.859115	74	0.0487191	0.624502	6.38317	346.923	0.936196
mat_12	BobWhite_c2937_1426	3B	724738399	2	1.85064	0.164433	-0.607665	2.1201	0.149665	1.33251	1.27942	0.261708	74	0.0456675	1.34058	5.45999	350.077	0.936196
mat_12	BS00067744_51	5B	571636158	2	1.84917	0.164663	-0.510546	2.0208	0.159416	-1.36879	1.80814	0.182895	74	0.0419998	1.09652	5.76305	352.902	0.936196
mat_12	Kukri_c17099_871	3A	20037632	2	1.84966	0.164688	0.410629	0.878179	0.351834	1.92923	3.52055	0.0646655	73	0.0548532	1.49162	5.18222	345.872	0.936196
mat_12	CAP12_c2521_103	2A	711980104	1	1.96935	0.164699	NaN	NaN	NaN	NaN	NaN	NaN	75	0.0437462	0.938926	6.06791	357.005	0.936196
mat_12	Kukri_c40034_123	4D	13842302	2	1.84725	0.164964	-0.196443	0.129904	0.719573	2.09699	2.69027	0.105265	74	0.0495077	1.09165	5.74829	356.757	0.936196
mat_12	Kukri_c20844_116	1D	50962242	2	1.84673	0.165146	-0.920569	3.69142	0.0586519	0.816291	0.41915	0.51942	73	0.0563762	0.897267	6.05783	347.44	0.936196
mat_12	Kukri_c36710_1007	7A	232757533	2	1.84418	0.165447	-0.828426	1.81183	0.182454	-3.08092	3.13086	0.0809996	74	0.0511379	0.961497	5.91633	352.402	0.936196
mat_12	BS00030911_51	7A	233336397	2	1.84418	0.165447	-0.828426	1.81183	0.182454	-3.08092	3.13086	0.0809996	74	0.0511379	0.961497	5.91633	352.402	0.936196
mat_12	wsnp_Ra_c31751_40835513	7A	237519296	2	1.84418	0.165447	-0.828426	1.81183	0.182454	-3.08092	3.13086	0.0809996	74	0.0511379	0.961497	5.91633	352.402	0.936196
mat_12	wsnp_Ex_c13440_21170884	5B	403544995	2	1.84417	0.165449	-0.842299	3.53306	0.0641474	-0.696608	0.506433	0.478955	74	0.0436083	0.954939	5.92265	353.867	0.936196
mat_12	Excalibur_c41710_417	5A	594143456	2	1.84478	0.165453	-1.01716	3.04566	0.0852197	-1.5764	1.76127	0.18866	73	0.059632	1.49662	5.41512	347.02	0.936196
mat_12	RAC875_rep_c106170_204	3A	733997175	2	1.84375	0.165515	0.0508081	0.0160489	0.899539	-1.84416	3.32898	0.0721607	74	0.056674	1.10858	5.72769	357.976	0.936196
mat_12	Excalibur_c71500_231	2B	648482684	2	1.84498	0.165524	0.680396	2.67926	0.106088	-1.33384	1.64743	0.203483	72	0.0508724	1.12563	5.722	343.028	0.936196
mat_12	wsnp_Ex_c3572_6531810	3A	484103188	2	1.84255	0.165805	0.906463	3.05091	0.0849566	0.163224	0.0191049	0.890452	73	0.0439105	0.617304	6.50062	347.663	0.936196
mat_12	BS00105531_51	7A	717036798	2	1.84311	0.166035	1.81046	3.3791	0.0703325	2.3855	1.82123	0.181578	70	0.070798	1.94715	4.22635	327.906	0.936196
mat_12	BS00063034_51	3B	685637619	2	1.84374	0.166163	0.121702	0.0575316	0.811173	2.92721	3.66743	0.0597559	68	0.0631667	1.79801	4.56245	321.599	0.936196
mat_12	wsnp_Ex_c2325_4355706	4D	26669218	2	1.83763	0.166483	-0.642666	1.14895	0.2873	1.85339	1.2383	0.269451	74	0.0583732	0.916879	5.98573	352.252	0.936196
mat_12	Excalibur_rep_c89066_287	2D	641234371	2	1.8356	0.166804	0.0154755	0.000389757	0.984303	-5.63505	3.50536	0.0651757	74	0.0815406	1.38899	5.451	352.57	0.936196
mat_12	BS00077914_51	2B	42281520	2	1.8341	0.167043	0.798717	3.24582	0.0757347	-1.31307	1.49643	0.225156	74	0.048928	0.986198	5.89065	352.357	0.936196
mat_12	Kukri_rep_c103893_875	2B	42953588	2	1.8341	0.167043	0.798717	3.24582	0.0757347	-1.31307	1.49643	0.225156	74	0.048928	0.986198	5.89065	352.357	0.936196
mat_12	Tdurum_contig54785_216	5A	558692780	2	1.83451	0.167078	-0.132053	0.101908	0.750476	-2.01709	3.29436	0.0736828	73	0.0579223	1.34841	5.44259	349.437	0.936196
mat_12	RAC875_c12181_1166	5D	555325188	2	1.83383	0.167085	0.805469	2.14196	0.147612	-1.64166	0.709369	0.402404	74	0.0465849	0.964879	5.92839	353.416	0.936196
mat_12	Tdurum_contig42858_1352	6A	550074106	2	1.83436	0.167101	0.545496	0.980695	0.325344	-3.13659	3.3659	0.0706904	73	0.0605653	0.8878	6.10317	352.359	0.936196
mat_12	RAC875_c7670_219	7D	23491891	1	1.9456	0.167235	NaN	NaN	NaN	NaN	NaN	NaN	75	0.02622	0.858912	6.12861	357.185	0.936196
mat_12	RAC875_c1706_1888	2A	755776286	2	1.83478	0.167243	-0.388566	0.889975	0.348729	-2.17094	3.36575	0.0708147	71	0.0456992	1.09853	5.84449	338.661	0.936196
mat_12	wsnp_Ex_c2678_4968284	3A	502386515	2	1.83341	0.167252	-0.476838	1.30252	0.257535	-1.70072	2.11569	0.150142	73	0.0544453	1.11805	5.79417	348.399	0.936196
mat_12	D_contig27392_286	5D	552783290	1	1.94473	0.167328	NaN	NaN	NaN	NaN	NaN	NaN	75	0.0250943	0.748526	6.27866	357.226	0.936196
mat_12	Kukri_c27692_822	7A	232594664	2	1.832	0.167376	0.846376	1.92296	0.16975	-3.0572	3.02124	0.0863973	74	0.0430416	0.722227	6.24388	362.281	0.936196
mat_12	BobWhite_c24063_231	7A	232745965	2	1.832	0.167376	0.846376	1.92296	0.16975	-3.0572	3.02124	0.0863973	74	0.0430416	0.722227	6.24388	362.281	0.936196
mat_12	RAC875_rep_c81479_191	1D	47879501	2	1.83194	0.167387	-0.964639	3.58542	0.0622516	0.272889	0.0267263	0.870591	74	0.0430416	0.690706	6.31466	352.978	0.936196
mat_12	Excalibur_c5958_1270	1D	56752992	2	1.83194	0.167387	-0.964639	3.58542	0.0622516	0.272889	0.0267263	0.870591	74	0.0430416	0.690706	6.31466	352.978	0.936196
mat_12	Excalibur_c5958_1398	1D	56753105	2	1.83194	0.167387	-0.964639	3.58542	0.0622516	0.272889	0.0267263	0.870591	74	0.0430416	0.690706	6.31466	352.978	0.936196
mat_12	IAAV5348	6B	120316224	2	1.83194	0.167387	-0.964639	3.58542	0.0622516	0.272889	0.0267263	0.870591	74	0.0430416	0.690706	6.31466	352.978	0.936196
mat_12	RAC875_c31619_118	6A	22695890	1	1.94373	0.167436	NaN	NaN	NaN	NaN	NaN	NaN	75	0.0349531	0.926463	6.03666	357.042	0.936196
mat_12	wsnp_Ku_c850_1758318	7D	106076468	2	1.83272	0.167465	0.216465	0.156762	0.693343	-3.20834	3.66447	0.0596146	72	0.0490673	1.41079	5.51352	344.451	0.936196
mat_12	CAP8_c8651_206	3B	40246061	2	1.83188	0.167496	0.530115	1.94409	0.167513	-1.32417	2.02897	0.158645	73	0.0448949	0.759095	6.28354	344.805	0.936196
mat_12	IAAV5873	5B	411813861	2	1.83549	0.167586	0.741047	3.01962	0.0869272	-0.621035	0.385796	0.536657	67	0.0706434	1.64691	4.81997	315.601	0.936196
mat_12	BS00063821_51	7B	232262677	2	1.82916	0.167931	0.297032	0.591021	0.444539	-1.72698	3.11908	0.0816193	73	0.0488044	1.73839	5.01113	335.526	0.936196
mat_12	RAC875_rep_c69619_78	2D	600977681	2	1.82932	0.168008	-0.0634653	0.0235487	0.878474	-2.0304	3.40448	0.06919	72	0.0442639	0.899387	5.84147	343.088	0.936196
mat_12	RAC875_c41444_939	6B	711237536	2	1.82949	0.168086	-0.611228	1.95908	0.166028	1.31936	1.46695	0.2299	71	0.0438543	1.09072	5.73516	333.137	0.936196
mat_12	BS00074817_51	1D	52339466	2	1.82499	0.1687	0.922668	3.63416	0.0606528	0.950946	0.491107	0.485724	72	0.0466667	0.973942	6.04531	341.606	0.936196
mat_12	BobWhite_c816_289	1D	43126632	2	1.8237	0.168804	0.967237	3.53972	0.0639585	-0.042584	0.000439055	0.983341	73	0.0528582	0.737261	6.3199	347.746	0.936196
mat_12	wsnp_Ex_c11976_19193550	1B	109729521	2	1.82143	0.16907	1.0721	3.51592	0.0647816	-1.18415	0.826472	0.366286	74	0.0445647	1.33532	5.46739	351.668	0.936196
mat_12	Excalibur_rep_c110501_525	3A	688615368	2	1.82219	0.16915	-0.152125	0.0616864	0.804567	2.90547	2.90433	0.0927147	72	0.059983	1.32948	5.62762	347.394	0.936196
mat_12	RAC875_rep_c98040_163	1D	382721229	2	1.82139	0.169176	-0.528131	1.52859	0.220342	1.37852	2.21535	0.141011	73	0.0455972	1.34477	5.54356	344.977	0.936196
mat_12	D_GDS7LZN02FDZX8_269	1D	36833032	2	1.8228	0.169378	-0.0377617	0.00874267	0.92578	1.89639	3.61921	0.0613516	69	0.0453994	0.870132	6.0237	327.406	0.936196
mat_12	Kukri_c52608_142	2B	797627190	2	1.81974	0.169443	0.772983	2.37791	0.127446	-1.85061	2.41279	0.124733	73	0.044795	0.975258	5.97273	347.064	0.936196
mat_12	wsnp_Ex_rep_c101269_86664147	7B	703246858	2	1.82016	0.169477	-0.773981	3.61187	0.0614287	-0.399705	0.104537	0.747402	72	0.0512199	1.45075	5.53263	345.402	0.936196
mat_12	RAC875_c61934_186	3A	733995575	2	1.8185	0.169542	0.0589688	0.0214373	0.883997	-1.74552	3.2411	0.0759437	74	0.0714271	1.20937	5.62037	354.722	0.936196
mat_12	Tdurum_contig10729_989	6A	615035787	2	1.81653	0.169861	-0.43449	0.171495	0.680001	-5.79474	3.62483	0.0608648	74	0.0588693	1.08273	5.80563	355.218	0.936196
mat_12	Kukri_rep_c109167_89	3D	464801758	2	1.81648	0.16987	0.613194	1.43445	0.234914	2.0564	2.93902	0.0907062	74	0.0850805	1.29411	5.50549	352.911	0.936196
mat_12	BS00059503_51	4A	639041793	2	1.81594	0.169957	-0.0360481	0.00659787	0.935484	-1.99203	3.55601	0.063309	74	0.0454379	1.47949	5.33466	350.723	0.936196
mat_12	Excalibur_c96483_520	7A	610205691	2	1.81564	0.170106	0.368099	0.411748	0.523121	2.00634	3.62095	0.0610549	73	0.0480191	0.81113	6.21246	347.551	0.936196
mat_12	IAAV3025	7A	610930185	2	1.81564	0.170106	0.368099	0.411748	0.523121	2.00634	3.62095	0.0610549	73	0.0480191	0.81113	6.21246	347.551	0.936196
mat_12	Excalibur_c9525_755	2D	644095634	2	1.8149	0.170225	0.108	0.0186759	0.891681	-2.34769	2.68118	0.105904	73	0.0458465	1.44298	5.40505	347.643	0.936196
mat_12	wsnp_CV776265A_Ta_2_1	6B	651010441	2	1.81495	0.170426	0.164825	0.178109	0.674297	3.59093	3.26111	0.0752403	71	0.0443886	1.34436	5.65924	342.065	0.936196
mat_12	wsnp_Ku_c230_460618	1B	144395823	2	1.81556	0.170547	0.113331	0.0417386	0.838729	-5.57257	3.36185	0.0710997	69	0.0616889	1.51711	5.42658	329.252	0.936196
mat_12	Excalibur_c82403_135	3B	573470272	2	1.81522	0.170718	-0.839704	3.62666	0.0611553	0.323248	0.0966558	0.756846	68	0.0618181	0.761475	6.46563	326.294	0.936196
mat_12	wsnp_JD_c1316_1891903	3B	500307611	2	1.81099	0.17076	0.965443	1.91579	0.170539	-2.642	2.96286	0.0894326	74	0.0602025	0.990365	5.88476	352.504	0.936196
mat_12	wsnp_Ra_c16287_24905062	7A	610208884	2	1.81058	0.170926	-0.36819	0.410751	0.523623	2.00654	3.61085	0.0614081	73	0.0439651	0.812819	6.23185	347.565	0.936196
mat_12	wsnp_Ex_c5594_9848626	5B	520886318	2	1.80921	0.17105	-1.22515	2.93949	0.0906809	-2.33909	2.06141	0.155341	74	0.044311	1.17719	5.65211	347.54	0.936196
mat_12	Tdurum_contig61178_618	6B	3883803	2	1.80891	0.171099	-1.30019	3.56353	0.0630369	-0.478527	0.0293674	0.864408	74	0.0434259	0.936068	5.9634	343.277	0.936196
mat_12	BS00023009_51	6D	468875624	1	1.90612	0.171551	NaN	NaN	NaN	NaN	NaN	NaN	75	0.0249282	0.972738	5.97359	357.16	0.936196
mat_12	Tdurum_contig10843_745	5A	594962056	2	1.80692	0.171626	1.03734	3.08987	0.0830914	-1.70706	1.68212	0.198842	72	0.0774582	1.50703	5.43147	345.281	0.936196
mat_12	Kukri_c11327_977	2A	507691373	2	1.80485	0.171861	0.0347705	0.00209658	0.963606	3.77499	3.23337	0.0763442	73	0.0725679	1.61784	5.22515	347.945	0.936196
mat_12	Jagger_c522_55	3D	550648958	2	1.80434	0.171946	-1.09637	3.37	0.0705228	0.274546	0.0201799	0.887433	73	0.0478624	1.35124	4.90659	338.233	0.936196
mat_12	Excalibur_c19547_75	4B	621326896	2	1.80297	0.172169	-0.714149	2.85196	0.0955892	-1.25905	1.46547	0.230021	73	0.0422927	1.03357	5.87939	347.395	0.936196
mat_12	Jagger_c3757_131	1B	645571922	2	1.8021	0.172414	-0.513077	1.56555	0.214961	-1.69576	2.37069	0.128078	72	0.0448678	0.460913	6.53443	342.022	0.936196
mat_12	RAC875_c19042_2102	2B	796803286	2	1.80255	0.172447	-0.270187	0.447625	0.505666	-1.9063	3.45107	0.0674171	71	0.0497171	1.28569	5.77762	340.532	0.936196
mat_12	Kukri_c36885_58	7D	16256588	2	1.80038	0.172803	-0.679941	2.89854	0.093097	0.938938	0.48591	0.488066	71	0.0528977	1.30902	5.75674	336.512	0.936196
mat_12	Tdurum_contig32277_121	3B	750863331	2	1.79877	0.172859	-0.925721	3.38387	0.0699598	-0.175295	0.0188271	0.891246	73	0.0477101	0.693666	6.38229	348.538	0.936196
mat_12	BS00062829_51	7B	475663838	2	1.79792	0.172899	0.863707	1.97297	0.164374	2.17909	2.57966	0.112562	74	0.0416276	0.66881	6.32939	353.509	0.936196
mat_12	RAC875_rep_c92223_1022	6A	584680339	2	1.8038	0.172943	0.729978	3.44495	0.0680503	0.287349	0.0358796	0.850364	65	0.0887782	1.92965	3.73644	301.575	0.936196
mat_12	Excalibur_c18265_399	2D	503445379	2	1.79731	0.173001	-0.853899	1.25512	0.26625	1.30142	0.702698	0.404615	74	0.043033	0.883111	6.02857	353.133	0.936196
mat_12	BS00095568_51	1B	470000695	2	1.7968	0.173085	-0.224941	0.246818	0.620818	1.64711	2.72001	0.103395	74	0.0544415	1.43473	5.35308	353.181	0.936196
mat_12	RAC875_c34516_316	2B	65375459	2	1.79713	0.173232	-0.128919	0.0806997	0.777178	2.20174	3.58202	0.0624848	72	0.0458466	1.27925	5.69205	342.031	0.936196
mat_12	wsnp_Ex_c7216_12391962	7A	520905250	2	1.79497	0.173387	-0.704401	2.13656	0.148115	0.868481	0.836671	0.363362	74	0.0517605	1.06787	5.80562	352.759	0.936196
mat_12	IAAV2037	7B	450578769	2	1.79329	0.173765	-0.0440877	0.00962177	0.922133	-2.25735	3.33921	0.0717908	73	0.0428028	1.16917	5.80027	346.983	0.936196
mat_12	Excalibur_c62042_175	3D	6335138	2	1.79217	0.17385	-0.629334	2.26599	0.136557	-1.78513	2.06515	0.154972	74	0.0618432	0.995732	5.90615	349.837	0.936196
mat_12	BS00091577_51	3B	245949006	2	1.79643	0.173906	0.0590594	0.0163908	0.898517	2.08635	3.54509	0.0641304	67	0.0699202	1.38601	5.87171	322.778	0.936196
mat_12	RAC875_c7016_2039	4A	637737866	2	1.79289	0.174038	0.860119	3.42259	0.0685309	0.00346922	4.25911e-06	0.998359	71	0.0450882	0.671211	6.58707	337.202	0.936196
mat_12	RFL_Contig1863_250	2B	26563658	2	1.79145	0.17407	0.711417	1.14082	0.289047	-1.41377	1.03342	0.312761	73	0.061297	1.20332	5.66818	347.839	0.936196
mat_12	BS00022459_51	3A	697454068	2	1.79137	0.174083	-1.52546	3.52117	0.0646425	0.900878	0.472382	0.494101	73	0.0817137	2.20636	3.92069	341.889	0.936196
mat_12	RAC875_rep_c69508_215	1D	46184689	2	1.79047	0.174132	0.957302	3.49269	0.065652	0.236144	0.020076	0.887715	74	0.0517569	0.76762	6.19935	351.387	0.936196
mat_12	RFL_Contig2257_810	7D	565198490	2	1.79088	0.174266	-0.482476	0.897797	0.346587	-1.98149	3.19244	0.0782483	72	0.0512204	1.54138	5.39934	345.513	0.936196
mat_12	wsnp_Ex_c3906_7086162	1A	368815771	2	1.78887	0.174397	-1.22664	3.57676	0.0625611	-0.918274	0.608442	0.437897	74	0.0693607	1.75212	4.99675	342.726	0.936196
mat_12	RAC875_rep_c70665_451	6A	201357695	2	1.78805	0.174534	-0.979655	2.35887	0.128896	-1.82504	2.72502	0.103083	74	0.0421105	0.863675	6.05682	351.869	0.936196
mat_12	wsnp_Ex_c25573_34834321	2B	189603883	2	1.78803	0.174638	1.09505	3.345	0.0715506	0.267323	0.0191971	0.89019	73	0.0441749	1.40558	4.84384	343.459	0.936196
mat_12	RAC875_c30507_292	3B	730235308	2	1.78803	0.174638	1.09505	3.345	0.0715506	0.267323	0.0191971	0.89019	73	0.0441749	1.40558	4.84384	343.459	0.936196
mat_12	BobWhite_c26893_161	3A	502268560	2	1.78655	0.174784	0.45241	1.22639	0.271746	-1.7869	2.03871	0.157603	74	0.0509141	1.15303	5.68507	361.655	0.936196
mat_12	wsnp_Ku_c3343_6206887	3A	502384945	2	1.78655	0.174784	0.45241	1.22639	0.271746	-1.7869	2.03871	0.157603	74	0.0509141	1.15303	5.68507	361.655	0.936196
mat_12	RAC875_rep_c83950_222	2B	775053134	2	1.78469	0.175095	-0.941265	2.58083	0.112482	-2.11233	2.26834	0.136356	74	0.0394944	0.648269	6.3618	354.265	0.936196
mat_12	wsnp_Ex_c48922_53681502	4B	613150370	2	1.78453	0.17522	-0.825794	3.25736	0.0752848	-0.815537	0.802915	0.373209	73	0.049468	1.15448	5.80562	348.182	0.936196
mat_12	BobWhite_c2844_569	1B	636753053	2	1.78385	0.175235	-0.538961	1.12285	0.2928	2.04164	2.95597	0.0897988	74	0.0501726	0.99692	5.882	351.918	0.974811
mat_12	Kukri_c79815_483	2B	589879893	2	1.78573	0.175448	0.0738431	0.0365295	0.848996	2.75034	3.40373	0.0694043	69	0.104624	1.89006	4.75966	324.093	0.936196
mat_12	wsnp_Ex_c4883_8705816	7A	582634491	2	1.78622	0.175481	-0.0778951	0.0189844	0.890824	2.17256	3.30158	0.0736858	68	0.115119	1.2951	5.34624	320.781	0.936196
mat_12	BobWhite_c14141_197	1B	581209687	2	1.78283	0.175504	0.357679	0.766079	0.384343	1.92214	3.11859	0.0816428	73	0.0587678	1.01877	5.93403	347.892	0.936196
mat_12	Excalibur_c4030_1770	1D	49935460	2	1.78301	0.175577	1.01891	3.55404	0.063493	0.63618	0.097631	0.755607	72	0.0411374	0.69198	6.47515	344.601	0.936196
mat_12	TA013367-0455	1A	364634467	2	1.7803	0.175829	-0.889376	2.96808	0.0891568	0.0801549	0.00489897	0.944391	74	0.040389	0.678622	6.31472	354.883	0.936196
mat_12	Kukri_c56203_965	2A	48868217	2	1.78069	0.175965	0.110224	0.0837042	0.773182	-2.06281	3.55258	0.063546	72	0.0504296	1.06388	5.97939	344.406	0.936196
mat_12	BobWhite_c20266_115	6D	304739500	2	1.77943	0.176075	0.281395	0.277015	0.600282	-3.27083	2.77001	0.100392	73	0.0454755	0.904724	6.09144	346.833	0.936196
mat_12	RAC875_c87321_108	1D	416101117	1	1.86727	0.1761	NaN	NaN	NaN	NaN	NaN	NaN	72	0.0223384	0.557097	6.81378	346.301	0.936196
mat_12	wsnp_Ex_rep_c102070_87317290	5B	476638386	2	1.77833	0.176159	0.343142	0.72065	0.398706	1.58886	2.89994	0.0928376	74	0.0552773	1.41602	5.39006	354.061	0.936196
mat_12	Kukri_c3773_1450	1A	503310102	2	1.77806	0.176205	-0.482998	1.18449	0.280024	-2.11755	2.02289	0.159203	74	0.053465	0.745607	6.22818	350.393	0.936196
mat_12	GENE-3528_61	5A	481912624	2	1.7778	0.176249	-0.69268	3.09394	0.0827748	-0.614117	0.343919	0.559385	74	0.044628	1.07747	5.87695	353.921	0.936196
mat_12	BS00079521_51	1A	503381152	2	1.77992	0.176308	0.728866	3.36286	0.0709946	-1.10069	0.592813	0.443962	70	0.0430127	0.865143	5.70098	330.361	0.936196
mat_12	Excalibur_c3423_1170	7B	6372235	2	1.77755	0.176493	-0.722201	3.46096	0.0669756	0.330971	0.0629275	0.802652	72	0.0455996	1.18355	5.80938	345.199	0.936196
mat_12	BS00064893_51	6D	79091020	2	1.77484	0.176746	-0.96529	3.52777	0.0643425	-0.995993	0.247668	0.620217	74	0.0460554	0.674576	6.32697	352.907	0.936196
mat_12	BS00022098_51	5B	601336382	2	1.77591	0.176767	0.611787	2.44849	0.122084	2.17983	1.67738	0.199468	72	0.0451642	0.699645	6.4539	344.656	0.936196
mat_12	Kukri_rep_c96809_352	3B	8806691	2	1.77465	0.176779	0.749633	3.11241	0.0818813	-0.81562	0.643903	0.424906	74	0.0456388	1.10448	5.75057	353.496	0.936196
mat_12	Ra_c11023_679	1A	362864231	2	1.7744	0.176821	0.894884	2.97532	0.088775	0.125242	0.0114591	0.915045	74	0.0428479	0.730798	6.25795	352.465	0.936196
mat_12	IAAV749	1A	369089046	2	1.7744	0.176821	0.894884	2.97532	0.088775	0.125242	0.0114591	0.915045	74	0.0428479	0.730798	6.25795	352.465	0.936196
mat_12	GENE-3024_71	4D	19301299	2	1.77095	0.177403	0.178391	0.0379301	0.846125	2.2583	2.27314	0.135948	74	0.0591914	1.40658	5.39048	352.402	0.936196
mat_12	tplb0025b13_2687	1A	3386886	2	1.77048	0.177482	-0.265053	0.10591	0.74578	2.86387	3.25457	0.07535	74	0.0512524	1.33693	5.46304	351.363	0.936196
mat_12	Excalibur_c12254_2003	1D	578892	2	1.77048	0.177482	-0.265053	0.10591	0.74578	2.86387	3.25457	0.07535	74	0.0512524	1.33693	5.46304	351.363	0.936196
mat_12	RAC875_rep_c78007_425	7B	701339782	2	1.77039	0.177499	-1.30697	3.01606	0.0866619	-2.38998	1.78688	0.185458	74	0.0488127	0.861884	6.06392	347.121	0.936196
mat_12	CAP12_c8025_110	7D	534334833	2	1.77148	0.177516	-0.0457724	0.010156	0.920012	-2.26549	3.31263	0.0729642	72	0.0477247	1.10548	5.92618	343.588	0.936196
mat_12	BobWhite_c44947_277	1A	589023903	2	1.77193	0.177544	-0.0745159	0.0278034	0.868053	1.70288	3.52326	0.064681	71	0.129731	2.15726	4.09425	333.835	0.936196
mat_12	BS00022025_51	3B	723444154	2	1.7708	0.177736	-0.632813	2.09659	0.152093	1.32588	1.20966	0.275168	71	0.051316	1.3332	5.71222	339.24	0.936196
mat_12	Tdurum_contig46808_4106	6B	667952911	2	1.76865	0.177892	-0.325215	0.727491	0.396526	-1.66511	3.2551	0.0753842	73	0.0662837	0.795534	6.26747	359.672	0.936196
mat_12	BobWhite_c5072_107	2B	44191044	2	1.77181	0.177898	0.823433	3.52791	0.0646959	-0.889704	0.337728	0.563093	68	0.0655972	0.775477	6.05228	322.834	0.936196
mat_12	RAC875_c52195_324	3A	711404082	2	1.76861	0.178001	0.73171	3.10752	0.0822348	0.704268	0.349755	0.55613	72	0.07612	1.37099	5.34881	334.68	0.936196
mat_12	wsnp_JD_c42879_30043973	2B	43629565	2	1.76602	0.178338	-0.798643	3.19114	0.0782483	-1.32114	1.32294	0.253871	73	0.0465653	1.01488	5.95167	347.503	0.936196
mat_12	Excalibur_c17039_436	2B	97953775	2	1.76786	0.178342	0.125863	0.102146	0.750235	1.94735	3.50456	0.0654387	70	0.0754688	1.54528	5.36673	334.628	0.936196
mat_12	BobWhite_c40868_120	1B	653875389	2	1.76927	0.178445	-0.955279	1.66207	0.201824	-1.77221	0.748008	0.39024	67	0.0462651	1.07215	5.54415	315.477	0.936196
mat_12	Excalibur_c48802_234	5B	701174467	2	1.76408	0.17857	-0.751172	1.79677	0.184261	2.35844	2.86288	0.0949096	74	0.0651715	1.2808	5.542	355.717	0.936196
mat_12	wsnp_Ex_c591_1177097	1A	203324312	1	1.84796	0.178579	NaN	NaN	NaN	NaN	NaN	NaN	68	0.0287938	0.87515	6.45986	327.767	0.936196
mat_12	wsnp_Ex_c3567_6526582	1A	222919165	1	1.84796	0.178579	NaN	NaN	NaN	NaN	NaN	NaN	68	0.0287938	0.87515	6.45986	327.767	0.936196
mat_12	Tdurum_contig61242_161	4B	621326983	2	1.76504	0.178608	-0.712629	2.78076	0.0998079	-1.28886	1.39228	0.241959	72	0.0519109	1.10928	5.89303	342.175	0.969617
mat_12	IACX11153	1D	41823625	2	1.76466	0.178777	-1.02237	3.51672	0.0649237	0.375625	0.0172586	0.895858	71	0.0581282	0.698021	6.59022	340.289	0.936196
mat_12	Tdurum_contig43263_246	3B	140987230	2	1.76226	0.178979	-1.00334	3.02976	0.0860221	0.231761	0.0546831	0.81577	73	0.0463348	0.718617	6.3431	344.263	0.936196
mat_12	CAP12_rep_c4929_51	2D	27853364	2	1.76264	0.179016	0.043692	0.00925651	0.923624	-2.26665	3.29998	0.0735018	72	0.0652339	1.07868	5.97735	352.655	0.936196
mat_12	IAAV7473	1D	416128414	2	1.76317	0.179031	0.67153	3.43804	0.0679243	-0.325862	0.0369887	0.848045	71	0.0532811	0.75317	5.83271	329.731	0.936196
mat_12	wsnp_Ex_rep_c66883_65286958	1B	464710489	1	1.83881	0.179215	NaN	NaN	NaN	NaN	NaN	NaN	75	0.0236418	1.11481	5.79754	357.448	0.936196
mat_12	Tdurum_contig59449_400	1B	487407362	2	1.76016	0.179339	0.70756	1.12648	0.292076	-2.55303	3.38576	0.0698833	73	0.0406451	0.909065	6.09424	348.614	0.936196
mat_12	BS00039211_51	2D	74981687	2	1.75911	0.179517	0.866664	2.9037	0.0926892	-1.65279	1.25119	0.267044	73	0.0564738	1.04502	5.94123	347.716	0.936196
mat_12	RFL_Contig4881_137	UN	383505044	1	1.84114	0.179584	NaN	NaN	NaN	NaN	NaN	NaN	65	0.0293509	1.15586	6.05984	312.511	0.936196
mat_12	wsnp_Ex_c3147_5816957	1D	427319073	2	1.75872	0.179686	-0.0609244	0.0204788	0.886613	2.16615	3.51696	0.0648561	72	0.0468434	1.51869	5.27094	343.494	0.936196
mat_12	Tdurum_contig48760_112	5A	535746459	2	1.75602	0.179948	-0.166792	0.192531	0.662114	-4.91888	3.36493	0.0706732	74	0.0403275	0.853443	6.07527	353.564	0.936196
mat_12	IAAV2526	5B	335947680	2	1.75633	0.179994	0.793653	1.8328	0.180032	1.2007	0.646798	0.423907	73	0.0442536	0.637655	6.47413	344.62	0.936196
mat_12	Kukri_c88698_296	1A	464837103	2	1.7558	0.180085	0.197432	0.0516936	0.820786	2.50264	2.8234	0.0972334	73	0.0466525	1.00131	5.95243	347.448	0.936196
mat_12	Tdurum_contig43844_1266	5A	490039118	2	1.75539	0.180156	-1.06809	3.49352	0.0656767	-0.72433	0.197203	0.65832	73	0.0459137	0.879168	6.09077	347.625	0.936196
mat_12	RAC875_c99519_227	5A	490310824	2	1.75539	0.180156	-1.06809	3.49352	0.0656767	-0.72433	0.197203	0.65832	73	0.0459137	0.879168	6.09077	347.625	0.936196
mat_12	Ku_c4823_673	1A	12411332	2	1.76629	0.180357	-1.37473	3.35857	0.0721744	-2.31731	0.776409	0.382008	57	0.0557242	0.251938	5.49999	258.379	0.936196
mat_12	RAC875_c35720_229	3B	724750803	2	1.75265	0.180527	0.645075	2.36335	0.128538	0.934119	0.903757	0.344913	74	0.0453263	0.918253	5.9881	356.801	0.936196
mat_12	RAC875_c3762_710	1B	65547668	2	1.7526	0.180635	-0.962185	3.49434	0.0656456	0.55662	0.0764618	0.782943	73	0.0534573	0.752941	6.31595	347.509	0.936196
mat_12	BobWhite_c14304_687	4D	487671694	2	1.75267	0.180726	0.749765	3.49502	0.0656775	0.470226	0.0259293	0.87253	72	0.052386	0.794293	6.27683	344.138	0.936196
mat_12	RAC875_c101793_136	3D	547625487	2	1.75216	0.180814	-0.281371	0.428574	0.514805	-2.23735	3.31845	0.0727185	72	0.0673856	1.81273	5.11803	349.08	0.936196
mat_12	BS00067927_51	2D	618696961	2	1.75238	0.180987	0.215942	0.26911	0.605589	-1.87954	3.11629	0.0819375	70	0.0406682	0.623457	6.30557	332.516	0.936196
mat_12	BS00007429_51	7A	62528306	2	1.74987	0.181208	-0.668001	1.72813	0.192881	1.8884	2.55436	0.114432	72	0.0474365	0.553283	6.65925	340.556	0.936196
mat_12	TA005327-0480	6B	690730566	2	1.74805	0.181321	0.0606141	0.0236343	0.878243	-1.60205	3.43876	0.0677225	74	0.0436858	1.14642	5.71097	352.92	0.936196
mat_12	wsnp_Ex_c2887_5330426	2A	71623182	2	1.74763	0.181395	0.904663	2.96645	0.0892429	-1.60148	1.82346	0.181074	74	0.0648131	1.36087	5.43892	350.671	0.936196
mat_12	TG0045	4B	623227175	2	1.74773	0.181476	-0.851457	2.10378	0.151278	0.973791	0.533803	0.467383	73	0.0426193	0.844094	6.16762	348.052	0.936196
mat_12	Tdurum_contig59603_74	4A	9929340	2	1.74713	0.18158	-0.433546	1.22235	0.272581	-2.89629	2.13797	0.148043	73	0.0588102	1.53681	5.31409	340.236	0.936196
mat_12	RFL_Contig1456_842	3B	39907014	2	1.75045	0.181662	-0.640805	2.67736	0.106545	-1.46872	1.40407	0.240292	67	0.0468772	0.742819	6.37324	319.463	0.936196
mat_12	RAC875_c4632_934	5B	655713392	2	1.74706	0.181694	-0.0807268	0.0120995	0.912722	3.0749	3.18132	0.0787581	72	0.068805	1.48765	5.48375	344.805	0.936196
mat_12	GENE-4774_69	3D	64200455	2	1.74934	0.181736	-0.737418	3.49577	0.0658959	0.368499	0.0962578	0.757331	68	0.0614765	0.845988	5.85564	325.689	0.936196
mat_12	Excalibur_rep_c102974_175	3A	61308905	2	1.75205	0.181762	-0.643912	2.04341	0.157807	-1.74594	1.59901	0.210701	64	0.0480301	0.708679	6.62497	307.495	0.936196
mat_12	BobWhite_c4438_162	5D	546689682	2	1.74515	0.181825	0.757072	2.62604	0.109436	1.74568	1.76869	0.187684	74	0.0401034	1.04396	5.83158	349.974	0.936196
mat_12	Kukri_c2955_281	5B	587126764	2	1.74493	0.181863	0.50851	1.07163	0.303994	-2.11946	3.22357	0.0767237	74	0.0615077	1.13176	5.77379	352.469	0.936196
mat_12	IACX8453	2D	13440369	2	1.7453	0.181898	0.271721	0.16303	0.687579	-5.22129	3.49053	0.0657895	73	0.0442211	0.734671	6.34148	345.244	0.936196
mat_12	tplb0036i05_182	3A	714951011	1	1.81597	0.181905	NaN	NaN	NaN	NaN	NaN	NaN	75	0.0379127	0.8099	6.2022	357.642	0.936196
mat_12	Kukri_c41408_233	5D	543215014	1	1.81595	0.181907	NaN	NaN	NaN	NaN	NaN	NaN	75	0.0325636	1.39364	5.46425	357.441	0.936196
mat_12	Kukri_rep_c71670_163	4B	654267279	2	1.74531	0.181998	0.286012	0.145422	0.704088	-2.31064	3.16711	0.0794144	72	0.0604064	1.61832	5.10911	343.765	0.936196
mat_12	BS00060391_51	3A	655635682	2	1.74382	0.182055	1.23783	3.47917	0.0661644	-0.866597	0.374784	0.54231	74	0.0409888	0.995798	5.8894	352.028	0.936196
mat_12	BS00062425_51	7A	83784441	2	1.74395	0.182132	-0.224182	0.337708	0.56297	-2.69506	3.29814	0.0735215	73	0.0459585	1.09767	5.86557	348.765	0.936196
mat_12	wsnp_Ex_c15740_24096817	7A	608674337	2	1.74691	0.182157	0.2607	0.271421	0.604098	1.91256	2.36515	0.128781	68	0.0436784	0.889235	6.15589	331.498	0.936196
mat_12	Kukri_rep_c73477_888	2A	71623236	2	1.74303	0.182193	-0.903158	2.9577	0.0897066	-1.60171	1.82084	0.181384	74	0.0430813	1.34383	5.46336	350.655	0.936196
mat_12	RAC875_c98242_422	6D	3942522	2	1.74255	0.182276	1.09115	3.37723	0.0701722	-0.611925	0.190949	0.663418	74	0.0486781	0.886872	6.03916	352.791	0.936196
mat_12	BS00023014_51	UN	126972088	2	1.74236	0.18231	-0.853348	1.83021	0.180278	-2.97019	1.21669	0.273634	74	0.0622477	1.63783	5.129	347.188	0.936196
mat_12	Ku_c11706_149	1B	119049220	2	1.74238	0.182404	1.36743	3.18093	0.0787164	-1.66803	1.32045	0.254314	73	0.0512011	1.79831	5.0778	336.172	0.936196
mat_12	BS00052075_51	1B	385162395	1	1.81178	0.18246	NaN	NaN	NaN	NaN	NaN	NaN	74	0.0409346	0.997365	5.98144	353.352	0.936196
mat_12	Excalibur_rep_c106362_961	7A	712307034	2	1.74139	0.182479	-0.373925	0.422978	0.517496	3.6989	3.40119	0.0692069	74	0.055628	1.69121	5.07925	356.106	0.936196
mat_12	wsnp_Ex_c12152_19428078	5B	603827779	2	1.74136	0.182483	0.607269	2.45805	0.121249	1.7199	1.67911	0.199124	74	0.043056	0.709029	6.28311	350.942	0.936196
mat_12	BobWhite_rep_c63363_160	2B	43615939	2	1.74053	0.182628	0.814499	3.39473	0.0694658	-1.10627	0.78196	0.379445	74	0.0499294	0.933152	5.97483	353.337	0.936196
mat_12	BobWhite_c5178_188	2A	751511167	2	1.74225	0.182851	0.304679	0.560134	0.456787	-2.25906	3.07984	0.0837726	69	0.0496955	1.29558	5.53553	328.263	0.936196
mat_12	wsnp_Ex_c10630_17338753	3A	722207762	2	1.73904	0.182888	-0.836688	3.3016	0.0733167	-1.65094	0.384366	0.537207	74	0.0438929	1.31429	5.51768	353.502	0.936196
mat_12	IAAV51	3B	140686794	2	1.73829	0.183018	-0.673839	2.96727	0.0891995	0.556639	0.446107	0.506296	74	0.0451636	0.802058	6.15129	358.196	0.936196
mat_12	Tdurum_contig45431_607	4B	101960423	2	1.73829	0.183018	-0.673839	2.96727	0.0891995	0.556639	0.446107	0.506296	74	0.0451636	0.802058	6.15129	358.196	0.936196
mat_12	wsnp_Ex_c49211_53875600	5A	511876800	2	1.73896	0.183102	-0.590586	2.03139	0.158461	-1.02445	0.714688	0.400732	72	0.0405528	0.906611	6.11647	342.586	0.936196
mat_12	Excalibur_c41736_124	7B	689669797	2	1.73894	0.183106	-0.7592	3.3298	0.0722421	-0.200246	0.0390033	0.844006	72	0.0412743	0.902029	6.1743	344.165	0.936196
mat_12	RAC875_c14354_934	6D	463715350	2	1.73781	0.183201	-0.759662	1.65676	0.202164	-3.05126	2.30541	0.133303	73	0.0496119	0.764304	6.26001	354.517	0.936196
mat_12	Kukri_rep_c101316_375	5B	618282865	2	1.73689	0.183263	0.921367	2.91237	0.0921534	0.0199812	0.000309348	0.986015	74	0.0399704	0.787119	6.17026	352.857	0.936196
mat_12	wsnp_Ex_c7366_12631101	2A	765707502	2	1.73967	0.183301	-0.123755	0.0236512	0.878231	-2.32505	2.53728	0.115824	69	0.0495622	1.52664	5.54662	330.539	0.936196
mat_12	Excalibur_c19547_1012	4B	621330510	2	1.73645	0.18334	-0.753126	3.31978	0.072547	-0.693274	0.495872	0.48356	74	0.0493752	0.927182	5.98297	352.975	0.936196
mat_12	Excalibur_c17872_137	1A	355335949	2	1.73634	0.18336	-0.88767	2.91207	0.0921698	0.0458623	0.00172509	0.966983	74	0.0462304	0.809789	6.14176	349.614	0.936196
mat_12	Kukri_c8465_54	3A	684044720	2	1.73628	0.18337	0.525414	0.502632	0.480604	1.66995	1.42214	0.236913	74	0.0861293	1.44717	5.35738	359.297	0.936196
mat_12	RFL_Contig29_1062	3B	40908508	2	1.7359	0.183436	0.53958	1.34561	0.249828	-1.5616	3.03846	0.0855237	74	0.0493758	0.918126	5.99245	352.844	0.936196
mat_12	wsnp_Ku_c15531_24168235	7A	645944949	2	1.73531	0.183639	0.0111867	0.000612136	0.98033	-2.21995	3.266	0.0749075	73	0.0533317	1.20916	5.7185	348.541	0.936196
mat_12	wsnp_BF474340A_Ta_2_1	1A	556942066	2	1.734	0.183771	0.743811	3.09748	0.0826027	-0.14062	0.023163	0.879454	74	0.0407486	0.726131	6.25994	352.766	0.936196
mat_12	Excalibur_c5438_274	2B	774958049	2	1.73505	0.183786	0.939254	2.07333	0.154289	-2.50382	2.64962	0.108005	72	0.0408818	0.684651	6.45821	350.352	0.936196
mat_12	Excalibur_rep_c111629_239	7B	553444864	1	1.79776	0.184084	NaN	NaN	NaN	NaN	NaN	NaN	75	0.0324024	1.1229	5.79472	357.026	0.936196
mat_12	RAC875_c4609_1756	2A	747611692	2	1.73261	0.184215	0.355486	0.306819	0.581379	-2.33999	3.43022	0.0681708	72	0.0429574	0.945737	6.12432	345.953	0.936196
mat_12	Excalibur_c42928_135	2B	17564495	1	1.81715	0.184254	NaN	NaN	NaN	NaN	NaN	NaN	47	0.0392913	5.69684e-05	5.69684	210.507	0.936196
mat_12	wsnp_Ex_rep_c72011_70562321	2A	709836910	2	1.73155	0.1844	0.0383563	0.00453366	0.946506	-2.07559	3.18645	0.0785225	72	0.0559583	1.48762	5.46884	347.929	0.936196
mat_12	RAC875_c12821_466	6A	615439091	2	1.73	0.184473	-0.725355	1.79604	0.184349	1.44985	0.77754	0.380789	74	0.0389711	0.603729	6.44335	357.78	0.936196
mat_12	D_F5XZDLF02H192C_184	7D	10715341	2	1.72932	0.184592	-0.803091	3.44841	0.0673469	-0.819116	0.156831	0.693247	74	0.0381887	0.395009	6.76584	356.832	0.936196
mat_12	Ku_c4260_441	4D	505332697	2	1.72954	0.184653	-0.196321	0.132735	0.716681	-1.971	2.76937	0.100431	73	0.0488138	1.94086	4.90343	345.751	0.936196
mat_12	BS00062567_51	2D	13779575	2	1.73046	0.184697	0.165402	0.0798366	0.778353	-2.37326	3.38085	0.0702	71	0.125109	1.75415	4.56737	332.442	0.936196
mat_12	wsnp_BE498786B_Ta_2_1	3B	78397428	2	1.73093	0.184832	0.0241399	0.00355855	0.952607	-1.96456	3.43387	0.0682117	69	0.064209	0.896938	5.82512	325.914	0.936196
mat_12	BobWhite_c17750_568	6B	206843385	2	1.72827	0.184978	-1.22965	3.15041	0.0801939	1.71387	1.87105	0.175669	72	0.0673781	1.13686	5.89401	345.008	0.936196
mat_12	RAC875_c34515_343	1A	569947670	2	1.72826	0.184979	-0.827023	3.29519	0.0737062	0.829473	0.544002	0.463209	72	0.0621682	0.975909	5.48	338.382	0.936196
mat_12	BS00077498_51	1B	651542307	2	1.7266	0.185072	-0.89071	1.38973	0.242279	-1.50861	0.766234	0.384256	74	0.0579067	1.38423	5.41524	352.907	0.936196
mat_12	BobWhite_c45091_53	6B	601345773	2	1.72647	0.185194	0.200725	0.109786	0.741351	3.7233	3.44047	0.0677119	73	0.0621985	1.44579	5.43068	347.914	0.936196
mat_12	TA002594-0782	1A	430179948	2	1.7259	0.185197	-0.750673	3.17257	0.0790445	0.451866	0.298004	0.586801	74	0.0483271	0.610489	6.42725	354.41	0.936196
mat_12	wsnp_BE637971B_Ta_1_20	1B	10204878	2	1.7256	0.185249	-1.22226	3.1017	0.082398	1.96303	0.899891	0.345941	74	0.083483	1.93391	4.86618	357.074	0.936196
mat_12	Kukri_rep_c93484_422	UN	476666398	2	1.72705	0.185298	-0.411298	1.36554	0.246545	-2.54816	1.90957	0.171405	71	0.0437259	1.06095	5.54611	334.765	0.936196
mat_12	wsnp_Ex_c29025_38097560	6A	70428095	2	1.72532	0.185299	-0.594052	0.609322	0.437567	-2.90242	3.44541	0.0674636	74	0.0552001	1.10933	5.78998	354.335	0.936196
mat_12	wsnp_Ex_c19778_28779907	3B	739170520	2	1.72248	0.185802	-0.14365	0.0977952	0.755383	2.19625	3.4437	0.0675299	74	0.0486826	0.813516	6.13913	356.393	0.936196
mat_12	Kukri_c25994_609	2D	91226984	1	1.78351	0.185868	NaN	NaN	NaN	NaN	NaN	NaN	74	0.0250359	0.835139	6.27429	354.852	0.936196
mat_12	wsnp_Ku_c14082_22272647	3B	730235258	2	1.7219	0.185905	-1.09009	3.2952	0.0735898	-0.0229922	0.000123591	0.99116	74	0.0450037	0.603561	6.45524	354.934	0.936196
mat_12	IACX6478	7B	741571219	2	1.72156	0.185966	-0.0739523	0.0132664	0.908619	3.4495	3.06964	0.0839667	74	0.0465731	1.33907	5.4689	349.918	0.936196
mat_12	wsnp_Ku_c12399_20037334	5A	549356003	2	1.71996	0.186348	0.260897	0.159393	0.690898	-5.07446	3.43662	0.0678625	73	0.0458413	0.984683	6.01304	346.303	0.936196
mat_12	BS00073879_51	6B	151375592	2	1.71921	0.186584	-0.912708	2.38451	0.126989	2.27219	2.3291	0.131418	72	0.0415953	0.590747	6.64204	347.004	0.936196
mat_12	wsnp_Ex_c42815_49298013	2D	387557064	2	1.71793	0.186611	-0.127927	0.0997842	0.75299	-2.24894	3.40271	0.0691462	74	0.115678	1.9036	4.89372	353.657	0.936196
mat_12	wsnp_Ex_c1395_2672221	7A	519169280	2	1.71832	0.18664	-0.674017	1.77352	0.187148	0.8415	0.885002	0.349981	73	0.0405607	1.2341	5.68147	342.483	0.987784
mat_12	RAC875_c5549_149	7A	519172738	2	1.71832	0.18664	-0.674017	1.77352	0.187148	0.8415	0.885002	0.349981	73	0.0405607	1.2341	5.68147	342.483	0.936196
mat_12	wsnp_Ex_c24085_33332723	3A	743757856	2	1.71753	0.186782	-0.00738297	0.000415594	0.983792	-1.98258	3.4314	0.0680668	73	0.0416464	0.73321	6.02665	348.951	0.936196
mat_12	Kukri_c11902_580	6A	611491341	2	1.71659	0.18685	1.10963	3.40457	0.0690719	-1.35099	0.392165	0.533117	74	0.0478925	0.718449	6.29337	352.849	0.936196
mat_12	wsnp_Ex_c4480_8056013	6D	464945776	2	1.71659	0.18685	1.10963	3.40457	0.0690719	-1.35099	0.392165	0.533117	74	0.0478925	0.718449	6.29337	352.849	0.936196
mat_12	Excalibur_c3341_519	3B	723789539	2	1.71581	0.18719	-0.645568	2.31809	0.132319	1.12079	0.961102	0.330238	72	0.0487824	0.921773	6.13885	345.14	0.936196
mat_12	Excalibur_c57920_54	5A	613703460	2	1.71494	0.187243	-0.314654	0.561675	0.456028	-1.99198	3.29183	0.0737912	73	0.0754013	1.34105	5.53524	347.586	0.936196
mat_12	Kukri_c16463_584	6A	88774014	2	1.71495	0.187344	0.80964	3.39606	0.0695269	-0.342865	0.10748	0.743997	72	0.0549572	1.61832	5.30689	345.432	0.936196
mat_12	Tdurum_contig28171_254	4A	541670022	1	1.77233	0.187414	NaN	NaN	NaN	NaN	NaN	NaN	71	0.0307889	1.01517	5.82281	336.185	0.936196
mat_12	TG0047	4B	623227175	1	1.77278	0.187421	NaN	NaN	NaN	NaN	NaN	NaN	70	0.0316399	1.73355	4.78908	331.958	0.998881
mat_12	wsnp_Ku_c11665_18999583	2B	139070521	2	1.71316	0.187464	-0.363345	0.565821	0.454343	-2.22132	3.33816	0.0717778	74	0.0408639	0.924632	5.98813	353.119	0.936196
mat_12	wsnp_Ex_c4480_8055475	6D	464944908	2	1.71193	0.187684	-1.10755	3.3961	0.069411	-1.34336	0.388618	0.534969	74	0.0402386	0.734225	6.25572	352.347	0.936196
mat_12	wsnp_Ra_c1303_2598907	7A	538782629	2	1.71291	0.187708	0.755926	2.5051	0.117923	0.56238	0.30098	0.58499	72	0.0441648	1.1123	5.89709	337.469	0.936196
mat_12	wsnp_Ex_c12577_20022294	6B	131895833	2	1.71226	0.187722	-0.441129	0.846219	0.360696	-1.39471	1.49953	0.224735	73	0.0660202	0.989462	6.00813	347.134	0.936196
mat_12	BS00051105_51	1A	60353493	2	1.71103	0.187846	0.774681	2.97362	0.0888644	0.221333	0.0437289	0.834941	74	0.0571229	1.14644	5.7173	355.754	0.936196
mat_12	Ra_c68_1191	4B	187730476	2	1.71078	0.18789	0.0885875	0.0133026	0.908495	3.58283	3.19937	0.0778156	74	0.0795953	1.335	5.51097	348.373	0.936196
mat_12	RFL_Contig3882_550	5A	472703184	2	1.71078	0.18789	0.0885875	0.0133026	0.908495	3.58283	3.19937	0.0778156	74	0.0795953	1.335	5.51097	348.373	0.936196
mat_12	Kukri_c9468_831	5B	442374729	2	1.71078	0.18789	0.0885875	0.0133026	0.908495	3.58283	3.19937	0.0778156	74	0.0795953	1.335	5.51097	348.373	0.936196
mat_12	Ra_c42714_1137	2A	605801445	2	1.71073	0.187899	0.102853	0.0687667	0.79388	1.70865	3.42136	0.0684057	74	0.0410659	0.704622	6.29815	357.781	0.936196
mat_12	Tdurum_contig14404_319	1B	655100644	2	1.7106	0.187922	0.664543	3.1155	0.0817329	-0.580916	0.12807	0.721475	74	0.0446689	0.83288	6.11278	353.698	0.936196
mat_12	BS00063809_51	4B	4996169	2	1.71077	0.187991	1.27319	3.03449	0.0857824	-2.11803	1.46472	0.230138	73	0.045259	0.982604	5.99896	348.857	0.936196
mat_12	BS00010993_51	6B	662257780	2	1.70958	0.188105	1.11163	2.97638	0.0887195	1.49294	1.41418	0.238218	74	0.0416003	1.03974	5.85457	352.678	0.936196
mat_12	wsnp_CAP7_c940_480745	1B	457460501	2	1.70644	0.188672	0.154818	0.125988	0.723652	1.67762	2.84118	0.0961473	74	0.0571389	1.35581	5.45458	352.949	0.941891
mat_12	BobWhite_rep_c66990_294	3B	705003490	2	1.70642	0.188773	1.39343	3.38342	0.0699779	-0.690047	0.179529	0.673041	73	0.047244	1.54787	4.68021	340.998	0.936196
mat_12	Excalibur_c50323_215	6A	1889101	1	1.75918	0.188805	NaN	NaN	NaN	NaN	NaN	NaN	75	0.0379569	1.07741	5.8698	357.353	0.936196
mat_12	Kukri_rep_c101620_1848	7B	744402118	2	1.70727	0.188825	0.436313	1.02335	0.31521	-1.80871	2.20548	0.14201	71	0.0489043	1.01797	5.86648	337.97	0.936196
mat_12	BS00009458_51	2D	637650816	2	1.70527	0.188882	-0.476487	0.544247	0.463043	-3.01136	3.34021	0.0716926	74	0.0449106	1.05516	5.81877	352.805	0.936196
mat_12	wsnp_Ex_c29304_38355434	5B	570925930	2	1.70458	0.189006	-0.512708	1.58413	0.212178	-1.05549	1.44068	0.233911	74	0.0666041	1.34695	5.47285	344.612	0.936196
mat_12	Ra_c70418_147	2A	709041003	2	1.70884	0.189109	0.70249	3.14186	0.0809924	0.259528	0.0598593	0.807489	66	0.0427559	0.178443	7.47387	315.012	0.936196
mat_12	Ex_c2510_477	2D	520040694	2	1.7045	0.189119	-0.18179	0.21071	0.647594	1.54085	3.056	0.084702	73	0.16418	2.07096	4.10408	343.631	0.936196
mat_12	wsnp_BF474379A_Ta_2_1	7A	581374842	2	1.70423	0.189168	0.0792359	0.0285294	0.866344	1.9812	3.39112	0.0696674	73	0.0425859	0.938658	6.0583	347.498	0.936196
mat_12	wsnp_Ex_c2526_4715978	5A	617356632	2	1.70355	0.189192	-1.04743	2.90606	0.0925002	-1.9202	1.856	0.177276	74	0.0557762	0.726478	6.28007	353.237	0.936196
mat_12	wsnp_Ex_c2840_5247386	1A	362628305	2	1.70352	0.189295	-0.920916	2.88443	0.0937578	0.0787218	0.00408431	0.94922	73	0.0417838	0.725126	6.36427	348.472	0.936196
mat_12	BS00067247_51	1B	298093273	1	1.7563	0.189336	NaN	NaN	NaN	NaN	NaN	NaN	72	0.0213664	1.49513	5.32129	342.763	0.936196
mat_12	Excalibur_c2484_2113	2B	717474694	2	1.70326	0.189342	0.394237	0.653622	0.421484	2.27359	2.49882	0.118315	73	0.0580113	1.25522	5.65669	347.346	0.936196
mat_12	BS00071732_51	6A	543397731	2	1.70226	0.189523	0.217165	0.307323	0.581046	-1.7679	3.27813	0.0743809	73	0.0585858	1.11695	5.84023	347.513	0.936196
mat_12	BobWhite_c17845_132	5B	631026775	2	1.70119	0.189619	0.444504	0.454488	0.502341	-3.41458	3.39175	0.0695855	74	0.0563433	1.00079	5.8939	354.228	0.936196
mat_12	wsnp_Ex_rep_c67471_66073969	6D	30282876	2	1.70009	0.189819	-0.122908	0.0768097	0.782452	-1.83732	2.89823	0.0929318	74	0.0399049	1.0664	5.80531	351.603	0.936196
mat_12	Ra_c58279_684	2A	41232496	2	1.69951	0.190023	-0.597142	2.23191	0.139556	-0.632018	0.446714	0.506036	73	0.0586602	1.44844	4.80783	338.947	0.936196
mat_12	RAC875_rep_c72023_267	5B	401009097	2	1.69753	0.190284	1.08413	2.97936	0.088563	0.851489	0.0972492	0.756045	74	0.0478378	1.18883	5.65434	352.828	0.936196
mat_12	BS00100738_51	UN	110650912	2	1.69613	0.190637	0.8225	2.08664	0.152931	-2.19647	2.19146	0.14314	73	0.0684398	1.21956	5.53537	344.319	0.87028
mat_12	wsnp_Ex_c27176_36393952	1D	464597378	2	1.69421	0.190987	-0.713998	2.80377	0.098382	-0.793452	0.64946	0.42296	73	0.0470641	0.961154	6.10488	348.795	0.936196
mat_12	BobWhite_c47831_87	6A	172124781	2	1.69459	0.191017	0.826498	3.02449	0.0863504	0.112787	0.0142106	0.905447	72	0.070897	1.65085	5.29905	346.774	0.936196
mat_12	RFL_Contig2206_1694	6B	690730078	2	1.69366	0.191087	-0.134645	0.121459	0.728474	-1.66966	3.3374	0.0718663	73	0.0446089	1.32873	5.40067	348.476	0.936196
mat_12	GENE-4824_212	3B	25275796	2	1.69309	0.191192	-0.955537	3.06396	0.0843061	-0.187643	0.0300252	0.862919	73	0.0455303	0.516278	6.64955	350.371	0.936196
mat_12	D_GBUVHFX02JKG4A_54	2D	31887626	2	1.69233	0.19143	-0.227032	0.284852	0.595205	1.86581	3.36796	0.0706647	72	0.0482872	0.876064	6.23598	345.173	0.936196
mat_12	Kukri_c82145_51	5B	640543418	2	1.69163	0.191458	-0.0919615	0.0358225	0.850415	-2.62861	3.38261	0.0700108	73	0.075819	1.41334	5.44108	343.198	0.936196
mat_12	BS00094553_51	1A	500979277	2	1.69189	0.191511	-0.710192	3.36262	0.070883	-0.322747	0.105513	0.746266	72	0.0400797	0.821601	6.26752	346.423	0.936196
mat_12	wsnp_Ex_c64005_62987067	3B	728919037	2	1.68967	0.191718	-0.508819	1.62406	0.206568	1.42181	1.38534	0.243017	74	0.049037	0.857304	6.08453	352.88	0.936196
mat_12	RFL_Contig2832_2410	5B	587127255	2	1.6902	0.191719	0.503214	1.03126	0.313264	-2.11051	3.11695	0.0817216	73	0.0501564	1.22875	5.70063	345.441	0.936196
mat_12	RAC875_c12542_1857	6A	610800896	1	1.73282	0.192114	NaN	NaN	NaN	NaN	NaN	NaN	75	0.0214194	0.978245	5.98217	357.583	0.936196
mat_12	D_contig13913_154	6D	465041380	1	1.73282	0.192114	NaN	NaN	NaN	NaN	NaN	NaN	75	0.0214194	0.978245	5.98217	357.583	0.936196
mat_12	RAC875_c6650_838	7B	114887	2	1.68858	0.192118	0.156116	0.0789198	0.779584	-5.16512	3.36188	0.0709132	72	0.0754607	1.51263	4.67989	337.922	0.936196
mat_12	RAC875_rep_c110526_324	7B	733530077	2	1.68733	0.192246	-0.775207	3.2523	0.0755069	0.0517618	0.00273884	0.958408	73	0.0412512	0.435565	6.78702	342.271	0.936196
mat_12	BS00068060_51	7B	491394446	2	1.68662	0.192278	0.88436	3.13403	0.0808492	0.602649	0.44252	0.508005	74	0.057727	1.24838	5.58244	353.557	0.936196
mat_12	wsnp_Ku_c10202_16937059	7A	581349401	2	1.68685	0.192435	0.770348	1.92303	0.169862	1.77816	2.31103	0.1329	72	0.0606151	1.46107	5.52016	345.902	0.936196
mat_12	tplb0051d06_1385	5A	475296100	2	1.68573	0.192441	-0.104747	0.0187818	0.891371	3.58571	3.1696	0.0791817	74	0.0461663	1.12851	5.73689	352.349	0.936196
mat_12	BS00065626_51	7B	491397598	2	1.68406	0.192748	-0.792068	2.87823	0.0940454	0.685341	0.509674	0.477557	74	0.056733	1.25473	5.59812	350.971	0.936196
mat_12	BS00071424_51	7A	636898769	2	1.68397	0.192767	-0.060382	0.0139572	0.906281	-2.57987	3.33419	0.0719431	74	0.054291	1.33638	5.49163	351.546	0.936196
mat_12	Kukri_c30875_283	5A	468466742	2	1.68288	0.192966	0.0877515	0.0159684	0.89979	3.57126	3.19893	0.0778354	74	0.0442238	1.11702	5.75106	351.086	0.936196
mat_12	IAAV1417	5D	367690059	2	1.68288	0.192966	0.0877515	0.0159684	0.89979	3.57126	3.19893	0.0778354	74	0.0442238	1.11702	5.75106	351.086	0.936196
mat_12	wsnp_Ku_c14275_22535576	5A	478820858	2	1.68125	0.193267	0.645652	1.70616	0.195585	1.20884	0.791443	0.376587	74	0.0401718	1.16621	5.68898	352.848	0.936196
mat_12	Tdurum_contig65853_242	1B	628514291	2	1.68078	0.193355	0.345586	0.459609	0.49995	1.89252	3.24574	0.0757387	74	0.0458355	1.49941	5.35821	354.063	0.936196
mat_12	Tdurum_contig59449_249	1B	487407513	2	1.67887	0.193709	0.710913	1.14069	0.289025	-2.36779	3.25005	0.0755486	74	0.0469228	1.00113	5.90967	352.553	0.936196
mat_12	BS00022258_51	4B	45511434	2	1.67933	0.193721	-0.187403	0.0552459	0.814841	2.46704	3.03717	0.0856469	73	0.0477129	1.51718	5.35467	347.414	0.936196
mat_12	BS00032830_51	3B	101313001	2	1.67982	0.19394	0.72344	2.98964	0.0882708	0.944008	0.951133	0.332838	70	0.0524369	1.57623	5.01806	326.049	0.936196
mat_12	wsnp_Ex_rep_c110800_93013978	6D	458362847	2	1.6786	0.193956	0.238237	0.392154	0.533178	-1.74224	2.87456	0.0943712	72	0.0482315	1.14468	5.80909	342.107	0.936196
mat_12	CAP7_c16_483	2B	777384852	2	1.67718	0.194322	-0.0158505	0.00180618	0.966222	2.49309	3.35436	0.0712823	71	0.0804258	1.7491	4.75233	329.045	0.936196
mat_12	wsnp_Ku_c1552_3060297	7A	645944949	2	1.67543	0.194444	-1.04575	3.14484	0.0803965	-1.45846	0.756726	0.387246	73	0.0537493	0.91918	6.14146	345.349	0.936196
mat_12	wsnp_CAP11_c1506_840938	5A	609872738	2	1.67507	0.194715	0.0933096	0.0344807	0.853225	-1.91296	3.17353	0.0791785	71	0.0526768	1.33441	5.71141	341.187	0.936196
mat_12	Tdurum_contig20214_279	7A	61816397	2	1.67364	0.194777	0.0460678	0.00802511	0.928867	2.04271	3.2286	0.0765564	73	0.0672325	1.12948	5.79464	348.153	0.936196
mat_12	BS00093841_51	1B	428069220	2	1.6797	0.194802	-0.640259	2.15023	0.147603	1.78075	1.17592	0.282388	63	0.0500178	1.10724	6.31334	303.818	0.936196
mat_12	Ra_c69552_1419	2D	459852882	2	1.67375	0.194856	-0.0303031	0.00212894	0.963328	-2.72173	2.84738	0.095912	72	0.0445955	1.2987	5.67205	345.697	0.936196
mat_12	Excalibur_c24041_794	1B	344044931	2	1.67206	0.194974	-0.930327	2.48507	0.119255	-1.97841	1.91556	0.170564	74	0.0516622	1.11006	5.76242	352.909	0.936196
mat_12	TA005260-0974	3B	690856407	2	1.67293	0.19501	-0.0884099	0.0306853	0.861443	3.51694	3.26809	0.0748753	72	0.0425197	1.08227	5.95303	343.74	0.936196
mat_12	JD_c51907_59	5B	14510727	2	1.6727	0.195052	-0.738529	1.91481	0.170765	0.841833	0.638542	0.426904	72	0.0569589	1.68866	5.28602	344.725	0.936196
mat_12	BobWhite_c16987_106	3B	289853890	2	1.67307	0.195086	1.1353	1.74067	0.191354	-2.85645	3.08824	0.0832324	71	0.0491408	1.35965	5.75765	340.851	0.936196
mat_12	Ra_c106922_334	5A	659712594	2	1.6722	0.195146	0.802667	3.31075	0.0730441	-0.608238	0.339735	0.561829	72	0.0451614	1.05183	5.70556	342.184	0.936196
mat_12	RAC875_c20979_234	2A	742132395	1	1.71037	0.195277	NaN	NaN	NaN	NaN	NaN	NaN	70	0.0289564	0.473653	6.58494	333.336	0.936196
mat_12	Excalibur_rep_c105463_330	6A	15766520	2	1.66962	0.195429	-0.571937	1.58471	0.212095	-1.02628	0.974792	0.326749	74	0.0564822	1.00193	5.8997	351.525	0.936196
mat_12	wsnp_Ku_c58044_60941831	7A	531190717	1	1.70684	0.195554	NaN	NaN	NaN	NaN	NaN	NaN	73	0.0237379	1.0199	6.00431	348.556	0.936196
mat_12	Kukri_c75644_104	5A	466036133	2	1.66757	0.195812	-0.0910113	0.017217	0.895967	3.56977	3.17233	0.0790554	74	0.04098	1.03103	5.86453	353.168	0.936196
mat_12	IACX12578	5A	467379650	2	1.66757	0.195812	-0.0910113	0.017217	0.895967	3.56977	3.17233	0.0790554	74	0.04098	1.03103	5.86453	353.168	0.936196
mat_12	Excalibur_c97639_173	5A	471475603	2	1.66757	0.195812	-0.0910113	0.017217	0.895967	3.56977	3.17233	0.0790554	74	0.04098	1.03103	5.86453	353.168	0.936196
mat_12	RAC875_c19105_498	5D	365698536	2	1.66757	0.195812	-0.0910113	0.017217	0.895967	3.56977	3.17233	0.0790554	74	0.04098	1.03103	5.86453	353.168	0.936196
mat_12	CAP8_c710_140	4A	738886532	2	1.66729	0.195963	0.135337	0.0847308	0.771823	-2.1055	3.32156	0.0725292	73	0.0603617	1.61798	4.95068	344.407	0.936196
mat_12	RAC875_c66695_560	2B	746037311	2	1.67106	0.196023	-0.724555	2.37404	0.128222	2.07077	1.77398	0.187541	66	0.0691891	1.8457	4.95814	307.955	0.936196
mat_12	GENE-3659_162	6A	101302694	2	1.66675	0.196064	-0.517759	0.844869	0.361077	-1.74418	1.56899	0.214407	73	0.0450793	1.46137	5.42646	351.676	0.936196
mat_12	Excalibur_c3556_520	3D	606299163	2	1.66705	0.196107	0.744429	3.33226	0.0721392	0.349667	0.145622	0.703894	72	0.0986123	1.50897	4.79173	338.88	0.936196
mat_12	Excalibur_c49496_705	1B	652453933	2	1.66577	0.19615	-0.938478	1.47972	0.227737	-1.82942	0.820698	0.367957	74	0.039435	1.80318	4.98955	351.122	0.936196
mat_12	RAC875_c35807_1110	2A	770414487	1	1.70114	0.196181	NaN	NaN	NaN	NaN	NaN	NaN	75	0.0244342	1.30234	5.58337	356.18	0.936196
mat_12	Ku_c13700_1196	2A	712721579	2	1.66807	0.196236	-0.66606	2.70354	0.104742	0.550293	0.305989	0.581966	69	0.0449126	0.976815	6.35064	332.322	0.936196
mat_12	wsnp_Ku_c38451_47086066	6A	109987800	2	1.66415	0.196551	0.816305	3.29803	0.0735259	0.44275	0.178987	0.673506	73	0.0530561	0.943441	6.09792	351.212	0.936196
mat_12	BS00099738_51	3B	759168631	2	1.66228	0.196806	-0.99439	3.32255	0.0724304	-0.650871	0.108995	0.742236	74	0.0591309	0.98558	5.93139	352.121	0.936196
mat_12	Ra_c1726_1071	5B	523186464	2	1.66122	0.197005	0.706326	3.29345	0.0736648	-0.171224	0.0171425	0.896191	74	0.0493169	0.924397	6.0301	353.547	0.936196
mat_12	CAP11_c1022_117	3A	714156165	2	1.66166	0.19712	-0.924603	1.8885	0.173694	2.60505	2.77125	0.100379	72	0.0395539	0.855127	6.03682	343.609	0.936196
mat_12	RAC875_c64504_417	2D	642871584	2	1.66058	0.197126	0.0526127	0.00455663	0.946366	-3.21783	2.94741	0.0902556	74	0.0538838	1.16618	5.68747	353.447	0.936196
mat_12	BS00110627_51	1A	536439292	2	1.66059	0.197222	0.454816	1.45348	0.231918	-0.995297	1.23698	0.269754	73	0.0443873	0.893419	5.57056	342.45	0.936196
mat_12	Tdurum_contig32579_121	6B	680084694	2	1.65962	0.197306	-0.340062	0.576915	0.44997	-1.60509	2.0672	0.154771	74	0.055277	1.00418	5.92285	344.9	0.936196
mat_12	Kukri_c24648_262	1A	47805439	2	1.65929	0.197466	0.947885	3.30564	0.0732019	0.519113	0.0667173	0.796915	73	0.0613239	0.911962	6.11631	349.419	0.936196
mat_12	RAC875_c8932_740	1D	47846184	2	1.65929	0.197466	0.947885	3.30564	0.0732019	0.519113	0.0667173	0.796915	73	0.0613239	0.911962	6.11631	349.419	0.936196
mat_12	wsnp_Ra_c5454_9660204	3A	737968502	2	1.65924	0.197475	0.510941	1.45929	0.230996	-1.96574	2.55946	0.114015	73	0.0713487	1.47585	5.19086	346.369	0.936196
mat_12	RFL_Contig617_1357	5D	562062879	1	1.69177	0.197516	NaN	NaN	NaN	NaN	NaN	NaN	73	0.057695	1.25231	5.57935	346.878	0.936196
mat_12	D_GBUVHFX01API9H_416	1D	458280781	2	1.66066	0.197627	-0.262939	0.274129	0.602278	3.2729	3.18321	0.0788598	69	0.0555918	1.20072	5.77139	327.319	0.936196
mat_12	RAC875_c38003_164	2A	14951382	2	1.65851	0.197713	-0.624866	1.16424	0.28424	-2.44216	3.11606	0.0818239	72	0.0628754	1.21898	5.45907	341.526	0.936196
mat_12	GENE-0293_154	1B	549465122	1	1.68897	0.197771	NaN	NaN	NaN	NaN	NaN	NaN	75	0.0326134	0.66228	6.42369	357.895	0.936196
mat_12	RFL_Contig2605_672	6A	87297124	2	1.65686	0.197925	0.778134	3.20133	0.0777839	-0.549609	0.317078	0.575119	73	0.0638469	1.58501	5.3107	349.142	0.936196
mat_12	BobWhite_c47040_185	6B	719509138	2	1.65685	0.197928	0.661094	3.24531	0.0758147	-0.460833	0.174223	0.677627	73	0.0407643	0.861303	5.97556	345.548	0.936196
mat_12	CAP12_c3074_192	1A	4063327	2	1.65615	0.198059	-0.331101	0.462145	0.498803	1.55409	1.81412	0.182238	73	0.0442968	0.987515	5.97204	347.138	0.936196
mat_12	BS00025191_51	3A	36474853	2	1.65477	0.198225	1.1382	2.82638	0.0970012	-2.1796	1.19312	0.278292	74	0.048661	1.0287	5.88024	352.182	0.936196
mat_12	IAAV444	2A	504711194	2	1.65457	0.19836	0.0426963	0.00330825	0.954292	3.59092	2.86898	0.0946244	73	0.0497234	1.30059	5.64523	344.683	0.936196
mat_12	GENE-1214_288	1A	347918980	2	1.6544	0.198393	0.826391	2.56626	0.113544	-2.02253	1.45421	0.231801	73	0.0391854	0.608278	6.45515	353.997	0.936196
mat_12	BS00091168_51	7A	521952004	2	1.65289	0.198778	-0.688367	1.84157	0.179066	0.894449	0.852924	0.358854	72	0.0495945	1.0807	5.99886	345.45	0.936196
mat_12	Ex_c12134_939	6D	463224101	2	1.65337	0.198897	-0.612176	1.33522	0.251865	1.29335	1.03807	0.311831	70	0.0443751	0.761814	6.44826	334.678	0.936196
mat_12	Ku_c29856_174	7A	616431867	2	1.65118	0.199004	0.771142	3.29907	0.0734817	-0.542993	0.106833	0.744727	73	0.0383866	0.472947	6.65205	343.236	0.936196
mat_12	IACX3169	3B	723648304	2	1.65225	0.199109	-0.734917	3.30128	0.0735685	0.0790025	0.00254297	0.959927	70	0.0421	1.35745	5.16339	331.472	0.936196
mat_12	Ex_c54863_29	7B	561748567	2	1.65052	0.199229	-0.548851	1.30699	0.256781	1.61837	2.48732	0.119213	72	0.0535132	0.991801	6.0469	344.039	0.936196
mat_12	BS00036766_51	2A	74107854	2	1.64837	0.199442	0.807837	2.77226	0.100197	-1.50585	1.63138	0.205559	74	0.0491806	1.13222	5.76389	352.672	0.936196
mat_12	RAC875_c25507_551	5B	55766221	2	1.65083	0.199714	0.378939	0.650136	0.42296	-1.5394	2.51201	0.117762	67	0.0464919	0.960437	6.02311	317.991	0.936196
mat_12	BS00010316_51	3A	683253221	2	1.64766	0.199775	0.651977	2.27511	0.135903	1.06049	0.876866	0.352236	72	0.0476477	1.24446	5.75417	344.206	0.936196
mat_12	wsnp_JD_c4438_5567972	5D	546689335	2	1.6475	0.199805	-0.781218	2.36626	0.128429	1.81294	1.82929	0.180503	72	0.0442599	1.03859	6.04698	337.844	0.936196
mat_12	TA001600-1603	1A	540146920	2	1.64603	0.199888	0.584224	2.09037	0.15251	1.17128	2.00524	0.16101	74	0.0394745	0.656959	6.3805	352.762	0.936196
mat_12	Tdurum_contig28712_225	UN	24304668	2	1.64607	0.199978	-0.743274	3.25671	0.0753135	0.654574	0.100222	0.752479	73	0.0533674	1.15482	5.71315	346.232	0.936196
mat_12	BS00086717_51	3B	140490743	2	1.64552	0.199985	-0.682295	2.95422	0.0898921	0.474147	0.343088	0.559859	74	0.0501107	0.893857	6.06137	353.031	0.936196
mat_12	Excalibur_c44487_642	2A	744447854	2	1.64571	0.200047	-0.616706	2.04497	0.157035	-1.0875	0.785253	0.37849	73	0.036512	0.453999	6.47108	345.514	0.936196
mat_12	Kukri_c18017_1696	1A	520338510	2	1.64519	0.200147	0.650535	2.99015	0.0880581	0.294547	0.096026	0.757547	73	0.0394961	0.605796	6.52675	348.523	0.936196
mat_12	Ra_c53208_433	5B	288305505	2	1.64446	0.200189	0.351614	0.759864	0.386229	1.81795	2.05032	0.156442	74	0.0383622	1.35807	5.46949	355.756	0.936196
mat_12	BS00071708_51	6A	530218616	2	1.64319	0.200529	0.0596523	0.0107351	0.917767	-2.8014	3.16768	0.0793288	73	0.0811333	2.18497	3.96047	341.767	0.936196
mat_12	BobWhite_c20382_117	4A	738750479	2	1.64101	0.200852	0.0239261	0.00364146	0.952046	-1.79245	3.15518	0.0798532	74	0.0393731	1.0808	5.7994	354.437	0.936196
mat_12	tplb0026o15_1634	4B	600655573	2	1.63751	0.201622	1.69038	2.29472	0.134193	-2.6854	3.02676	0.0861745	73	0.0526779	1.36446	5.57963	347.056	0.936196
mat_12	wsnp_Ex_c48087_53105842	1A	24943574	2	1.63709	0.201702	-0.359546	0.754457	0.387955	1.3702	2.41126	0.12485	73	0.0515854	1.51807	5.17497	345.669	0.936196
mat_12	GENE-0033_233	1A	542003086	2	1.63923	0.201707	0.781475	3.06784	0.0843642	0.796469	0.890928	0.348568	69	0.0412257	0.579566	6.85028	333.216	0.936196
mat_12	wsnp_Ex_c12433_19827016	5B	92223365	2	1.63624	0.201868	0.311511	0.66105	0.41887	-1.55213	3.02314	0.0863587	73	0.0396765	0.965532	6.02961	348.172	0.936196
mat_12	IAAV7221	UN	452910786	2	1.63546	0.20192	1.21332	1.4194	0.237361	-1.56895	0.520105	0.4731	74	0.0450541	0.911765	6.02447	352.885	0.936196
mat_12	BS00063625_51	6D	448960202	2	1.63541	0.201931	0.727379	3.25846	0.0751795	0.275888	0.0669644	0.796537	74	0.0388805	0.595528	6.51206	359.889	0.936196
mat_12	Kukri_c54678_88	1A	513625857	2	1.63854	0.201952	0.394443	1.34342	0.250546	-2.37172	2.30235	0.133883	68	0.0431704	1.01769	5.69395	318.771	0.936196
mat_12	wsnp_JD_c12333_12595897	5B	680352546	2	1.63628	0.201958	-0.096263	0.0292407	0.864711	-2.06881	3.09642	0.0827721	72	0.0433325	1.17214	5.93544	344.889	0.936196
mat_12	BS00010557_51	7B	560531600	2	1.63663	0.201995	-0.570815	1.38604	0.243063	1.5884	2.36057	0.128944	71	0.0423465	0.992942	6.11553	339.006	0.936196
mat_12	wsnp_Ex_c28429_37553452	4A	16191571	2	1.64072	0.202015	0.43523	1.0225	0.315796	1.50869	1.56227	0.215957	64	0.0492421	1.00422	6.35151	304.848	0.936196
mat_12	Kukri_c97631_275	2B	648912666	2	1.63546	0.202118	0.355708	0.61784	0.434467	-1.91171	3.04576	0.0852746	72	0.0475189	1.44017	5.36989	336.561	0.936196
mat_12	RAC875_c69_499	UN	40650947	2	1.633	0.202396	-0.110516	0.0586054	0.809393	1.75182	3.23275	0.076314	74	0.0392653	1.10598	5.77715	352.661	0.936196
mat_12	RAC875_c69_717	UN	40651276	2	1.633	0.202396	-0.110516	0.0586054	0.809393	1.75182	3.23275	0.076314	74	0.0392653	1.10598	5.77715	352.661	0.936196
mat_12	Excalibur_c34964_326	2A	677486275	2	1.63294	0.202408	0.662966	2.84983	0.0956516	0.359868	0.160211	0.690131	74	0.0420412	1.1746	5.69361	354.774	0.936196
mat_12	wsnp_Ex_c22401_31592784	3B	68466182	2	1.63539	0.202559	0.148855	0.0756228	0.784166	3.59531	3.2692	0.0750802	68	0.0953281	1.55553	5.27673	325.227	0.936196
mat_12	Kukri_c34806_112	3A	693158740	2	1.63187	0.202713	0.584435	1.4711	0.229137	0.89063	0.703245	0.404471	73	0.0384232	0.597917	6.53257	347.859	0.936196
mat_12	BS00072993_51	3B	739167876	2	1.63187	0.202713	0.584435	1.4711	0.229137	0.89063	0.703245	0.404471	73	0.0384232	0.597917	6.53257	347.859	0.936196
mat_12	CAP7_c7296_88	7A	642736749	2	1.63128	0.202731	0.790333	1.59257	0.210976	-2.4877	2.27306	0.135956	74	0.0599309	1.41303	5.39896	351.965	0.936196
mat_12	wsnp_Ku_c4560_8232439	7B	450677057	2	1.63176	0.202733	-0.0285239	0.00414109	0.948869	-2.28663	3.09404	0.0828284	73	0.0824582	1.4327	5.43097	349.822	0.936196
mat_12	Excalibur_rep_c69799_1999	2A	675896498	2	1.6321	0.202768	0.730656	3.23716	0.0762349	-0.378442	0.148408	0.701213	72	0.0508759	1.41027	5.47916	343.978	0.936196
mat_12	Excalibur_c92241_336	2A	32139600	2	1.63261	0.202772	0.611489	1.50947	0.223335	0.808108	0.575506	0.450626	71	0.0410389	0.588536	6.39028	332.167	0.936196
mat_12	BobWhite_rep_c50671_356	6A	14627384	2	1.63044	0.202893	-0.519414	0.993484	0.322185	-1.31536	1.18518	0.279885	74	0.0621741	1.55022	5.29241	350.399	0.936196
mat_12	Tdurum_contig59339_428	6B	715751134	2	1.63078	0.202924	-0.878939	0.688051	0.40957	-2.70298	3.16019	0.079677	73	0.0453607	1.1159	5.85467	354.319	0.936196
mat_12	wsnp_JD_c7325_8422075	6B	35368237	2	1.62982	0.203211	0.674813	2.74393	0.102038	0.592166	0.497366	0.482967	72	0.0461135	0.993312	6.0682	344.735	0.936196
mat_12	wsnp_CAP11_rep_c4157_1965583	3A	20020818	2	1.62868	0.20364	-0.289784	0.535295	0.466867	1.79433	2.99246	0.0881242	70	0.062974	1.62623	4.95271	332.6	0.936196
mat_12	Excalibur_rep_c104791_725	5D	548367494	2	1.62674	0.20371	0.710645	3.18633	0.0784684	0.244459	0.0506711	0.822537	73	0.042102	0.590251	6.56039	347.898	0.936196
mat_12	Kukri_c29592_559	6D	75871421	1	1.64449	0.203713	NaN	NaN	NaN	NaN	NaN	NaN	75	0.0308921	0.888632	6.1244	357.202	0.936196
mat_12	Ex_c36309_435	2D	628938282	2	1.62562	0.203833	-0.102212	0.0179609	0.893757	2.56533	2.46789	0.120518	74	0.0546196	1.15152	5.74027	353.522	0.936196
mat_12	Excalibur_c2217_731	7B	593185084	2	1.62514	0.203925	-0.18752	0.0327668	0.856857	-2.12385	1.67614	0.199518	74	0.04913	1.18473	5.70956	352.424	0.936196
mat_12	Kukri_c33374_1048	2A	4790334	2	1.62434	0.204179	-0.710083	3.18786	0.0783985	-0.405856	0.188402	0.665548	73	0.0408072	0.819075	6.21707	347.923	0.936196
mat_12	BS00092492_51	3B	49861348	2	1.62479	0.20419	0.601777	1.67267	0.200094	-0.700524	0.678736	0.412781	72	0.0392599	0.802407	6.33997	345.676	0.936196
mat_12	RFL_Contig3172_444	2D	577158461	2	1.6371	0.204227	-0.866617	3.20276	0.0792283	0.365992	0.0758579	0.784062	54	0.0482277	0.129595	7.80853	257.981	0.936196
mat_12	Kukri_c10757_183	7A	706908526	2	1.62399	0.204247	0.0331438	0.00536545	0.941811	1.58335	3.2299	0.0764984	73	0.0429294	1.72593	5.14346	349.219	0.936196
mat_12	Tdurum_contig17500_876	5B	516033281	2	1.62379	0.204386	-0.971205	1.40221	0.240303	-2.6477	0.924755	0.339493	72	0.0553803	1.1489	5.41743	340.487	0.936196
mat_12	wsnp_Ra_c16287_24904962	7A	610208884	2	1.62368	0.204407	-0.373582	0.418737	0.519655	1.99585	3.23161	0.0764816	72	0.0418831	0.741355	6.40753	345.572	0.936196
mat_12	BobWhite_c46338_76	5A	468462646	2	1.62295	0.204451	0.0378839	0.00219986	0.962721	3.43358	2.78423	0.0995395	73	0.0396992	1.13802	5.81567	348.404	0.936196
mat_12	Excalibur_c63344_424	5B	432175137	2	1.62295	0.204451	0.0378839	0.00219986	0.962721	3.43358	2.78423	0.0995395	73	0.0396992	1.13802	5.81567	348.404	0.936196
mat_12	BS00067895_51	5D	370450697	2	1.62295	0.204451	0.0378839	0.00219986	0.962721	3.43358	2.78423	0.0995395	73	0.0396992	1.13802	5.81567	348.404	0.936196
[truncated: 7,354 more rows]
